# Supplementary material for: The Combination of Both Heat and Water Stresses May Worsen Botryosphaeria Dieback Symptoms in Grapevine
Source: MDPI journal article supplement (doi:10.3390/plants12040753), 2023-02-08
Supplement: s1 [file s1]

**Supplemental Table 1**

| Genes                                         |                                                             | Genes ID           | Primers sequences                | Genbank no.    | Efficacy |
|-----------------------------------------------|-------------------------------------------------------------|--------------------|----------------------------------|----------------|----------|
| Housekeeping genes                            |                                                             |                    | 5'-AACCAAAATATCCGGAGTAAAAGA-3'   |                |          |
|                                               | <i>EF1-α</i> (elongation factor 1-α)                        | VIT_206s0004g03240 | 5'-GAACTGGGTGCTTGATAGGC-3'       | XM_002284888.3 | 100 %    |
|                                               | <i>39SRP</i> (39S ribosomal proteinL41-A)                   | VIT_218s0001g06410 | 5'-GATATAACAGGGAATACAGCAC-3'     | XM_002285709.4 | 100 %    |
| Photosynthesis                                | <i>CAB1</i> (chlorophyll a-b binding protein)               | VIT_207s0005g02220 | 5'-GGAAATCAAGAACGGGCGTC-3'       | XM_002273070.4 | 96.1 %   |
|                                               |                                                             |                    | 5'-GCGTTGTTGTTCACTGGGTC-3'       |                |          |
| Defense                                       | <i>CHIT1B</i> (chitinase class I basic)                     | VIT_203s0038g03400 | 5'-CCCAAGCCTTCTGCCATA-3'         | NM_001280962.1 | 101.7 %  |
|                                               |                                                             |                    | 5'-TGTGATAACACCAAAACCGGG-3'      |                |          |
|                                               | <i>PR5</i> (thaumatin-like protein)                         | VIT_202s0025g04270 | 5'-TTTGATCATCCTTAGGGTAGCTGTAA-3' | XM_002282994.3 | 99.6 %   |
| Secondary cell wall biogenesis                | <i>FLA11</i> (fasciclin-like arabinogalactan protein 11)    | VIT_208s0040g01970 | 5'-CGAAACCCCAAAGCCTAAGAA-3'      | XM_002280793.2 | 98.7 %   |
|                                               |                                                             |                    | 5'-GAAACACAAAGGGGTTGCA-3'        |                |          |
| Detoxification                                | <i>APX</i> (cytosolic ascorbate peroxidase)                 | VIT_208s0040g03150 | 5'-GGATTTGCTGATGCTGAGGAAC-3'     | EU280159.1     | 97.2 %   |
|                                               |                                                             |                    | 5'-ACCCAAATCACCGAGAAGCTCC-3'     |                |          |
| Stress tolerance                              | <i>GSTF9</i> (Glutathione S-transferase F9)                 | VIT_212s0028g00930 | 5'-GGAGCAGTGGCTAGAGTTGA-3'       | XM_002283173.3 | 101.6 %  |
|                                               |                                                             |                    | 5'-CATCTGCAGGAAACCCATCT-3'       |                |          |
|                                               | <i>sHSP</i> (class I small heat shock protein)              | VIT_206s0004g05770 | 5'-TCCTCGTGAAATGTGGGACC-3'       | XM_002281470.3 | 90.4 %   |
|                                               | <i>PIP2-2</i> (plasma membrane 2-2 aquaporin)               | VIT_203s0038g02520 | 5'-TCTCTATCCGGGCTTTGGC-3'        | NM_001281028.1 | 93.4 %   |
| Flavonoid/ isoflavonoid biosynthesis pathways |                                                             |                    | 5'-GCTGTGCCTTGTGTAGCC-3'         |                |          |
|                                               | <i>CHS</i> (chalcone synthase)                              | VIT_214s0068g00920 | 5'-CGAAGGAGCAATCGACGGA-3'        | NM_001280950.1 | 99.6 %   |
| Transcription factor                          |                                                             |                    | 5'-GTCGCTGATGCCTATCGGAG-3'       |                |          |
|                                               | <i>CRF2</i> (ethylene-responsive transcription factor CRF2) | VIT_202s0025g01055 | 5'-ACCTATGATACGGCGGAGGA-3'       | XM_002271490.3 | 99.5 %   |
|                                               |                                                             |                    | 5'-CACCGTCACCGGCTCTATTT-3'       |                |          |
