# Supplementary material for: The Combination of Both Heat and Water Stresses May Worsen Botryosphaeria Dieback Symptoms in Grapevine
Source: MDPI journal article supplement (doi:10.3390/plants12040753), 2023-02-08
Supplement: s1 [file s1]

## LIST OF STRESS MODULATED IDENTIFIED COMPOUNDS

**Lists of annotated significant  $m/z$  between fungus *Neofusicoccum parvum* and *Diplodia seriata* (Np or Ds) inoculated-grapevines and non-inoculated ones under abiotic stresses: none (NAS), water (WS), heat (HS) or both stresses (WSHS).** Comparisons were performed with Perseus software (Student T-test FDR < 0.05 and S0 = 0). Some lists are reduced to TOPs modulated compounds and the most specific ones selected by increasing the T-test stringency parameters (FDR and S0, specified in table legends) are highlighted in bold characters. Each compound is identified with an ID number. Measured  $m/z$  and calculated KEGG theoretical Mass and error (ppm) are indicated and the number of possible MassTrix identifications is indicated in the “n” column but only the first three ones are listed. Functional categories (Cat.) were manually determined according to KEGG annotations: Carbohydrates (Cb); Lipids (Lp); Phytochemicals (Ph); Peptides (Pp); Amino sugars (AmS); Nucleotides (Nu) and no match (NM). Functional categories counts are indicated in the table legends (Total and TOPs). Compounds are ranked according to their normalized value differences (up in green gradient and down in red gradient) between inoculated and non-inoculated samples. Identified isotopic compounds are indicated in italic characters.

### IDENTIFIED *Np* COMPOUNDS

**a) List of 33 identified “No abiotic stress” (NAS) *Np* vs NI (non-inoculated as control) from the significant 209  $m/z$  at time B** selected with T-test (FDR=0.05 and S0=0).

Total 33 functional category counts: Ph:15; Lp:5; Cb:6; Pp:1; AmS:2; Nu:2; NM:2.

| ID   | T-test<br><i>p-value</i> | NAS<br><i>Np-NI</i> | $m/z$      | Mass       | error<br>(ppm) | n | Cat. | Formula    | Identifications                                                              |                                                                                                                                                                                 |                                                                                                            |
|------|--------------------------|---------------------|------------|------------|----------------|---|------|------------|------------------------------------------------------------------------------|---------------------------------------------------------------------------------------------------------------------------------------------------------------------------------|------------------------------------------------------------------------------------------------------------|
| 7463 | 0.002902                 | -2.882              | 609.188462 | 610.195738 | 0.997565       | 1 | Ph   | C34H30N2O9 | Atalanine                                                                    |                                                                                                                                                                                 |                                                                                                            |
| 5540 | 0.001066                 | -2.815              | 472.146076 | 473.153353 | 0.058057       | 1 | Ph   | C20H27NO12 | Proteacin                                                                    |                                                                                                                                                                                 |                                                                                                            |
| 1590 | 0.016934                 | -2.706              | 299.113594 | 300.120870 | -0.109047      | 1 | Cb   | C14H20O7   | Salidroside; p-Hydroxyphenethyl alcohol 1-O-β-D-glucoside; Tyrosol glucoside |                                                                                                                                                                                 |                                                                                                            |
| 2931 | 0.031813                 | -2.544              | 351.127125 | 352.134401 | -0.124492      | 3 | Lp   | C18H24O5S  | Estradiol-17β 3-sulfate                                                      | Estradiol-17β 3-sulfate (see KEGG C08357); (8S,9S,13S,14S,17S)-17-hydroxy-13-methyl-3-sulfooxy-6,7,8,9,11,12,14,15,16,17-decahydrocyclopenta[a]phenanthrene [secondary alcohol] | Estradiol-17β 3-sulfate (see KEGG C08357); estra-1,3,5(10)-triene-3,17β-diol 3-sulfate [Sulfates [ST0502]] |
| 1194 | 0.006606                 | -2.456              | 274.056804 | 275.064080 | -0.131780      | 1 | Ph   | C10H13NO8  | 3-β-D-Glucopyranuronosyloxy-5-methylisoxazole                                |                                                                                                                                                                                 |                                                                                                            |
| 2347 | 0.000273                 | -2.287              | 330.119400 | 331.126676 | -0.122722      | 1 | AmS  | C14H21NO8  | 5'-O-β-D-Glucosylpyridoxine                                                  |                                                                                                                                                                                 |                                                                                                            |
| 149  | 0.025849                 | -2.240              | 195.033221 | 196.040497 | -0.242029      | 2 | Cb   | C6H12O5S   | Thioglucoside                                                                | Thiogalactoside                                                                                                                                                                 |                                                                                                            |
| 8451 | 0.018576                 | -2.217              | 721.416962 | 722.424238 | 0.153962       | 2 | Ph   | C39H62O12  | Yamogenin 3-O-neohesperidoside                                               | Ophiopogonin B                                                                                                                                                                  |                                                                                                            |
| 3153 | 0.033093                 | -2.118              | 359.134719 | 360.141996 | -0.102120      | 2 | Ph   | C16H24O9   | 7-Deoxyloganate                                                              | 8-Epideoxyloganic acid                                                                                                                                                          |                                                                                                            |
| 2999 | 0.011394                 | -2.076              | 353.124149 | 354.131425 | 0.362582       | 1 | Nu   | C16H20N2O7 | O18 isotope of Cotinineglucuronide; 3,4,5-                                   |                                                                                                                                                                                 |                                                                                                            |

|      |          |        |            |            |           |   |     |              |                                                                                                                                                                                                         |                                                                                                                                              |                                                                                                   |
|------|----------|--------|------------|------------|-----------|---|-----|--------------|---------------------------------------------------------------------------------------------------------------------------------------------------------------------------------------------------------|----------------------------------------------------------------------------------------------------------------------------------------------|---------------------------------------------------------------------------------------------------|
| 5002 | 0.007963 | -1.848 | 441.189684 | 442.196960 | 0.399232  | 1 | Lp  | C18H35O10P   | trihydroxy-6-[5-(1-methyl-5-oxo-pyrrolidin-2-yl)pyridin-1-yl]-oxane-2-carboxylic acid [cation] PG(6:/6:); 1,2-dihexanoyl-sn-glycero-3-phospho-(1'-sn-glycerol) [Diacylglycerophosphoglycerols [GP0401]] |                                                                                                                                              |                                                                                                   |
| 3775 | 0.049025 | -1.846 | 382.100408 | 383.107685 | -0.072174 | 1 | Nu  | C14H17N5O8   | Succinyladenosine; (2S)-2-[[9-[(2S,3R,4S,5R)-3,4-dihydroxy-5-(hydroxymethyl)oxolan-2-yl]purin-6-yl]amino]butanedioic acid [primary alcohol]                                                             |                                                                                                                                              |                                                                                                   |
| 3454 | 0.022085 | -1.838 | 369.082692 | 370.089969 | -0.075560 | 1 | Ph  | C16H18O10    | Fraxin                                                                                                                                                                                                  |                                                                                                                                              |                                                                                                   |
| 2745 | 0.003371 | -1.828 | 345.119057 | 346.126333 | -0.142585 | 4 | Lp  | C15H22O9     | Aucubin                                                                                                                                                                                                 | Deutzioside                                                                                                                                  | Aucubin (see KEGG C09771) [C10 isoprenoids (monoterpenes) [PR0102]]                               |
| 1864 | 0.019281 | -1.826 | 311.098334 | 312.105610 | -0.117249 | 6 | Cb  | C11H20O10    | Vicianose; O- $\alpha$ -L-Arabinopyranosyl-(1-6)-D-glucopyranose                                                                                                                                        | Arabino-galactose                                                                                                                            | 6-O- $\beta$ -D-Xylopyranosyl-D-glucose; Primeverose                                              |
| 1635 | 0.045664 | -1.784 | 301.056465 | 302.063741 | 0.451381  | 1 | NM  | C16H13ClN2O2 | Cl37 isotope of 3-(4-Chloro-benzyl)-5-(2-methoxy-phenyl)-[1,2,4]oxadiazole                                                                                                                              |                                                                                                                                              |                                                                                                   |
| 3591 | 0.048769 | -1.771 | 375.129648 | 376.136925 | -0.059642 | 3 | Ph  | C16H24O10    | Loganate; Loganic acid                                                                                                                                                                                  | 7-Epiloganic acid                                                                                                                            |                                                                                                   |
| 2925 | 0.039102 | -1.713 | 351.085174 | 352.092450 | 0.281489  | 3 | Lp  | C18H23BrO2   | O18 isotope of 16 $\alpha$ -Bromo-17 $\beta$ -estradiol; 16 $\alpha$ -Bromo-1,3,5(10)-estratriene-3,17 $\beta$ -diol                                                                                    | O18 isotope of 18-bromo-9E,17E-Octadecadiene-7,15-dienoic acid [Unsaturated fatty acids [FA0103]]                                            | O18 isotope of 18-bromo-9Z,17E-Octadecadiene-7,15-dienoic acid [Unsaturated fatty acids [FA0103]] |
| 5361 | 0.000000 | -1.692 | 461.202845 | 462.210121 | 0.020421  | 2 | Cb  | C21H34O11    | Patrinoside                                                                                                                                                                                             | Valerosidatum; Valerosidate                                                                                                                  |                                                                                                   |
| 2804 | 0.020608 | -1.688 | 347.116953 | 348.124230 | 0.459549  | 1 | NM  | C18H21ClN2O3 | Compound VII; 5-(5-(6-Chloro-4-(4,5-dihydro-2-oxazolyl)phenoxy)pentyl)-3-methylisoxazole                                                                                                                |                                                                                                                                              |                                                                                                   |
| 1730 | 0.064316 | -1.542 | 305.087764 | 306.095041 | 0.422086  | 2 | Pp  | C11H16N2O8   | O18 isotope of N-Acetyl-aspartyl-glutamate; NAAG                                                                                                                                                        | O18 isotope of N-Acetylasparylglutamic acid (see KEGG C12270); 2-[(2-acetamido-3-carboxy-propanoyl)amino]pentanedioic acid [carboxylic acid] |                                                                                                   |
| 4335 | 0.009150 | -1.527 | 405.119098 | 406.126375 | -0.018591 | 7 | Ph  | C20H22O9     | Astringin                                                                                                                                                                                               | Trichocarpin                                                                                                                                 | Anadanthoside [Flavans, Flavanols and Leucoanthocyanidins [PK1202]]                               |
| 1197 | 0.060528 | -1.524 | 274.093187 | 275.100463 | -0.141722 | 2 | AmS | C11H17NO7    | Cardiospermin                                                                                                                                                                                           | Sarmentosin; 2-Butenenitrile,4-( $\beta$ -D-glucopyranosyloxy)-2-(hydroxymethyl)-,(E)-                                                       |                                                                                                   |
| 254  | 0.002153 | -1.485 | 215.032742 | 216.040018 | 0.600053  | 1 | Cb  | C5H13O7P     | 2-C-Methyl-D-erythritol 4-phosphate                                                                                                                                                                     |                                                                                                                                              |                                                                                                   |

|      |          |        |            |            |           |   |    |           |                                                                                                                                                                |                                                                                                     |                                                                                      |
|------|----------|--------|------------|------------|-----------|---|----|-----------|----------------------------------------------------------------------------------------------------------------------------------------------------------------|-----------------------------------------------------------------------------------------------------|--------------------------------------------------------------------------------------|
| 3851 | 0.043273 | -1.480 | 385.077611 | 386.084888 | -0.061436 | 1 | Ph | C16H18O11 | O-Feruloylgalactarate; O-Feruloylgalactaric acid; 2'-(E)-O-Feruloylgalactaric acid                                                                             |                                                                                                     |                                                                                      |
| 3918 | 0.019872 | -1.461 | 387.129645 | 388.136921 | -0.066108 | 5 | Cb | C17H24O10 | Secologanin; (-)-Secologanin                                                                                                                                   | Geniposide                                                                                          | Verbenalin; Cornin (glycoside)                                                       |
| 3972 | 0.063208 | -1.458 | 389.181684 | 390.188961 | -0.055764 | 1 | Lp | C18H30O9  | (-)-11-hydroxy-9,10-dihydrojasmonic acid 11-β-D-glucoside; {(1R,2R)-2-[4-(β-D-glucopyranosyloxy)pentyl]-3-oxocyclopentyl}acetic acid [Jasmonic acids [FA0202]] |                                                                                                     |                                                                                      |
| 199  | 0.009689 | -1.402 | 205.035328 | 206.042604 | -0.236504 | 7 | Ph | C7H10O7   | (R)-2-Hydroxybutane-1,2,4-tricarboxylate; Homocitrate; Homocitric acid; 3-Hydroxy-3-carboxyadipic acid; (R)-2-Hydroxy-1,2,4-butanetricarboxylic acid           | 2-Methylcitrate; 2-Hydroxybutane-1,2,3-tricarboxylate; (2R,3S)-2-Hydroxybutane-1,2,3-tricarboxylate | (2S,3R)-3-Hydroxybutane-1,2,3-tricarboxylate; Methylisocitrate; Methylisocitric acid |
| 631  | 0.027726 | -1.267 | 261.007409 | 262.014685 | -0.147911 | 1 | Ph | C9H10O7S  | Homovanillic acid sulfate (see KEGG C05582) [alkyl aryl ether]                                                                                                 |                                                                                                     |                                                                                      |
| 3963 | 0.039111 | -1.216 | 389.108911 | 390.116188 | -0.061532 | 2 | Ph | C16H22O11 | Monotropein                                                                                                                                                    | Monotropein (see KEGG C09788) [C10 isoprenoids (monoterpenes) [PR0102]]                             |                                                                                      |
| 2668 | 0.037964 | -1.101 | 343.067029 | 344.074305 | -0.120136 | 1 | Ph | C14H16O10 | Theogallin                                                                                                                                                     |                                                                                                     |                                                                                      |
| 2127 | 0.067159 | -0.433 | 321.134320 | 322.141596 | -0.131584 | 2 | Ph | C17H22O6  | Tetraneurin A                                                                                                                                                  | epi-Tulipinolide diepoxide                                                                          |                                                                                      |
| 1219 | 0.042524 | -0.349 | 275.092466 | 276.099742 | -0.114667 | 5 | Ph | C15H16O5  | Lactucin                                                                                                                                                       | Vernolepin                                                                                          | Vernomenin                                                                           |

**b) List of 33 identified WS *Np* vs NI (non-inoculated as control) from the significant 157 *m/z* at time B** selected with T-test (FDR=0.05 and S0=0). Total 33 functional category counts: Ph:12; Lp:5; Cb:12; Pp:0; AmS:0; Nu:0; NM:4.

| ID   | T-test<br><i>p-value</i> | WS<br><i>Np-NI</i> | <i>m/z</i> | Mass       | error<br>(ppm) | n  | Cat. | Formula  | Identifications                                                                                                                            |                                                                                                |                                                                                                                                                                      |
|------|--------------------------|--------------------|------------|------------|----------------|----|------|----------|--------------------------------------------------------------------------------------------------------------------------------------------|------------------------------------------------------------------------------------------------|----------------------------------------------------------------------------------------------------------------------------------------------------------------------|
| 9    | 0.012805                 | +1.811             | 159.029884 | 160.037160 | -0.082384      | 14 | Lp   | C6H8O5   | 2-Oxoadipate; 2-Oxoadipic acid                                                                                                             | 3-Oxoadipate; 3-Oxoadipic acid; 3-Keto-adipate                                                 | 3D-(3,5/4)-Trihydroxycyclohexane-1,2-dione; D-2,3-Diketo-4-deoxy-epi-inositol; (3R,4S,5R)-3,4,5-Trihydroxy-1,2-cyclohexanedione; 3,5/4-Trihydroxycyclohexa-1,2-dione |
| 66   | 0.002355                 | +1.802             | 177.040444 | 178.047720 | -0.101633      | 28 | Cb   | C6H10O6  | D-Glucono-1,5-lactone; Gluconic lactone; Gluconic acid lactone; 1,5-Gluconolactone; delta-Gluconolactone; D-Gluconolactone; Gluconolactone | 2-Dehydro-3-deoxy-D-gluconate; 2-Keto-3-deoxy-D-gluconate                                      | 5-Dehydro-D-fructose                                                                                                                                                 |
| 1191 | 0.000000                 | +1.674             | 273.170718 | 274.177995 | -0.106789      | 2  | Lp   | C14H26O5 | 3-Hydroxytetradecanedioic acid; 3-hydroxy-tetradecanedioic acid [secondary alcohol]                                                        | 3-hydroxy-tetradecanedioic acid; 3-hydroxy-tetradecanedioic acid [Dicarboxylic acids [FA0117]] |                                                                                                                                                                      |

|      |          |        |            |            |           |    |    |              |                                                                                                                                                          |                                                                                                                                                          |                                                                                                                                   |
|------|----------|--------|------------|------------|-----------|----|----|--------------|----------------------------------------------------------------------------------------------------------------------------------------------------------|----------------------------------------------------------------------------------------------------------------------------------------------------------|-----------------------------------------------------------------------------------------------------------------------------------|
| 8272 | 0.054397 | +1.081 | 697.481468 | 698.488745 | 0.127128  | 14 | Lp | C39H71O8P    | PA(14:1(9Z)/22:2(13Z,16Z)); 1-(9Z-tetradecenoyl)-2-(13Z,16Z-docosadienoyl)-glycero-3-phosphate [Diacylglycerophosphates [GP1001]]                        | PA(16:1(9Z)/20:2(11Z,14Z)); 1-(9Z-hexadecenoyl)-2-(11Z,14Z-eicosadienoyl)-glycero-3-phosphate [Diacylglycerophosphates [GP1001]]                         | PA(17:2(9Z,12Z)/19:1(9Z)); 1-(9Z,12Z-heptadecadienoyl)-2-(9Z-nonadecenoyl)-glycero-3-phosphate [Diacylglycerophosphates [GP1001]] |
| 631  | 0.002411 | -2.932 | 261.007409 | 262.014685 | -0.147911 | 1  | Ph | C9H10O7S     | Homovanillic acid sulfate (see KEGG C05582) [alkyl aryl ether ]                                                                                          |                                                                                                                                                          |                                                                                                                                   |
| 2804 | 0.005229 | -2.512 | 347.116953 | 348.124230 | 0.459549  | 1  | NM | C18H21ClN2O3 | Compound VII; 5-(5-(6-Chloro-4-(4,5-dihydro-2-oxazolyl)phenoxy)pentyl)-3-methylisoxazole                                                                 |                                                                                                                                                          |                                                                                                                                   |
| 6424 | 0.013195 | -2.455 | 523.145770 | 524.153046 | 0.105903  | 1  | Ph | C24H28O13    | Barbatoflavan [Flavans, Flavanols and Leucoanthocyanidins [PK1202]]                                                                                      |                                                                                                                                                          |                                                                                                                                   |
| 2668 | 0.047706 | -2.182 | 343.067029 | 344.074305 | -0.120136 | 1  | Ph | C14H16O10    | Theogallin                                                                                                                                               |                                                                                                                                                          |                                                                                                                                   |
| 1635 | 0.000450 | -2.136 | 301.056465 | 302.063741 | 0.451381  | 1  | NM | C16H13ClN2O2 | Cl37 isotope of 3-(4-Chloro-benzyl)-5-(2-methoxy-phenyl)-[1,2,4]oxadiazole                                                                               |                                                                                                                                                          |                                                                                                                                   |
| 3594 | 0.000056 | -2.029 | 375.166033 | 376.173310 | 0.410054  | 1  | NM | C21H27ClN2O2 | Cl37 isotope of Hydroxyzine                                                                                                                              |                                                                                                                                                          |                                                                                                                                   |
| 517  | 0.015029 | -1.987 | 249.080184 | 250.087460 | -0.138795 | 2  | Lp | C10H18O5S    | 2-(5'-Methylthio)pentylmalic acid; 2-(5'-Methylthio)pentylmalate                                                                                         | 3-(5'-Methylthio)pentylmalic acid; 3-(5'-Methylthio)pentylmalate                                                                                         |                                                                                                                                   |
| 1194 | 0.007014 | -1.939 | 274.056804 | 275.064080 | -0.131780 | 1  | Ph | C10H13NO8    | 3-β-D-Glucopyranuronosyloxy-5-methylisoxazole                                                                                                            |                                                                                                                                                          |                                                                                                                                   |
| 7463 | 0.004680 | -1.736 | 609.188462 | 610.195738 | 0.997565  | 1  | Ph | C34H30N2O9   | Atalanine                                                                                                                                                |                                                                                                                                                          |                                                                                                                                   |
| 3500 | 0.000835 | -1.727 | 371.134722 | 372.141998 | -0.092343 | 1  | Ph | C17H24O9     | Syringin; Eleutheroside B                                                                                                                                |                                                                                                                                                          |                                                                                                                                   |
| 3454 | 0.003527 | -1.708 | 369.082692 | 370.089969 | -0.075560 | 1  | Ph | C16H18O10    | Fraxin                                                                                                                                                   |                                                                                                                                                          |                                                                                                                                   |
| 2222 | 0.039798 | -1.654 | 325.113981 | 326.121258 | -0.120525 | 6  | Cb | C12H22O10    | α-L-Fucosyl-1,2-β-D-galactoside; Glycoprotein α-L-fucosyl-(1,2)-D-galactose; Glycolipid α-L-fucosyl-1,2-β-D-galactose; α-L-Fucosyl-(1->2)-D-galactosyl-R | 2-O-α-L-Rhamnopyranosyl-D-glucopyranose; Neohesperidose                                                                                                  | Robinobiose                                                                                                                       |
| 3101 | 0.013537 | -1.646 | 357.119069 | 358.126345 | -0.103262 | 3  | Cb | C16H22O9     | Tarennoside                                                                                                                                              | 10-Deoxygeniposidic acid                                                                                                                                 | Sweroside                                                                                                                         |
| 2389 | 0.052927 | -1.636 | 331.176183 | 332.183459 | -0.132727 | 2  | Lp | C16H28O7     | (2S,3S)-2-Hydroxytridecane-1,2,3-tricarboxylate                                                                                                          | (2S,3S)-2-hydroxytridecane-1,2,3-tricarboxylic acid (see KEGG C04655); (2S,3S)-2-hydroxytridecane-1,2,3-tricarboxylic acid [Dicarboxylic acids [FA0117]] |                                                                                                                                   |
| 2224 | 0.002050 | -1.630 | 325.129232 | 326.136508 | -0.138273 | 1  | NM | C16H22O7     | Hinokitiol glucoside; β-Thujaplicin 2-O-β-D-glucoside                                                                                                    |                                                                                                                                                          |                                                                                                                                   |
| 2373 | 0.013486 | -1.628 | 331.067028 | 332.074304 | -0.128768 | 1  | Cb | C13H16O10    | 1-O-Galloyl-β-D-glucose; 1-Galloyl-β-glucose; β-Glucogallin; 1-Galloyl-β-D-glucose                                                                       |                                                                                                                                                          |                                                                                                                                   |
| 2074 | 0.027394 | -1.610 | 319.139804 | 320.147080 | -0.116812 | 2  | Cb | C14H24O8     | Valproic acid glucuronide (see KEGG C03033); 3,4,5-trihydroxy-6-(2-                                                                                      | Octanoylglucuronide (see KEGG C03033) [secondary alcohol]                                                                                                |                                                                                                                                   |

|      |          |        |            |            |           |    |    |           |                                                                                                                   |                                                                                                                                     |                                                                                                   |
|------|----------|--------|------------|------------|-----------|----|----|-----------|-------------------------------------------------------------------------------------------------------------------|-------------------------------------------------------------------------------------------------------------------------------------|---------------------------------------------------------------------------------------------------|
| 4335 | 0.004527 | -1.559 | 405.119098 | 406.126375 | -0.018591 | 7  | Ph | C20H22O9  | propylpentanoyloxy)oxane-2-carboxylic acid [secondary alcohol]<br>Astringin                                       | Trichocarpin                                                                                                                        | Anadanthoside [Flavans, Flavanols and Leucoanthocyanidins [PK1202]]                               |
| 3591 | 0.010757 | -1.521 | 375.129648 | 376.136925 | -0.059642 | 3  | Ph | C16H24O10 | Loganate; Loganic acid                                                                                            | 7-Epiloganic acid                                                                                                                   |                                                                                                   |
| 5934 | 0.013027 | -1.485 | 493.098797 | 494.106073 | 0.065861  | 31 | Ph | C22H22O13 | Pleurostimin 7-glucoside; 5,6,7,3',4'-Pentahydroxy-8-methoxyflavone 7-glucoside [Flavones and Flavanols [PK1211]] | Laricitrin 3-galactoside [Flavones and Flavanols [PK1211]]                                                                          | Laricitrin 3-glucoside [Flavones and Flavanols [PK1211]]                                          |
| 2920 | 0.008095 | -1.456 | 351.056857 | 352.064133 | -0.122128 | 2  | Cb | C12H16O12 | 4-(4-Deoxy-β-D-gluc-4-enuronosyl)-D-galacturonate                                                                 | 4-(4-Deoxy-α-D-gluc-4-enuronosyl)-D-galacturonate; 4-(4-Deoxy-α-D-galact-4-enuronosyl)-D-galacturonate; Unsaturated digalacturonate |                                                                                                   |
| 3977 | 0.001828 | -1.236 | 389.218068 | 390.225344 | -0.061128 | 2  | Cb | C19H34O8  | Rehmaionoside A                                                                                                   | Rehmaionoside B                                                                                                                     |                                                                                                   |
| 7699 | 0.012660 | -1.208 | 633.073451 | 634.080728 | 0.180016  | 1  | Ph | C27H22O18 | Corilagin                                                                                                         |                                                                                                                                     |                                                                                                   |
| 3540 | 0.039047 | -1.067 | 373.113993 | 374.121269 | -0.074217 | 4  | Ph | C16H22O10 | Secologanate                                                                                                      | Swertiamarin                                                                                                                        | Geniposidic acid                                                                                  |
| 1864 | 0.039079 | -1.066 | 311.098334 | 312.105610 | -0.117249 | 6  | Cb | C11H20O10 | Vicianose; O-α-L-Arabinopyranosyl-(1-6)-D-glucopyranose                                                           | Arabino-galactose                                                                                                                   | 6-O-β-D-Xylopyranosyl-D-glucose; Primeverose                                                      |
| 5732 | 0.053416 | -1.039 | 483.078040 | 484.085316 | 0.022519  | 1  | Cb | C20H20O14 | 1-O,6-O-Digalloyl-β-D-glucose                                                                                     |                                                                                                                                     |                                                                                                   |
| 2811 | 0.043362 | -1.020 | 347.171101 | 348.178377 | -0.116791 | 1  | Cb | C16H28O8  | Schizonepetoside E                                                                                                |                                                                                                                                     |                                                                                                   |
| 3926 | 0.002504 | -0.928 | 387.202414 | 388.209691 | -0.070880 | 5  | Cb | C19H32O8  | Rehmaionoside C                                                                                                   | methyl 9-hydroperoxy-10,12,13,15-bisepidioxy-16E-octadecenoate [Hydroperoxy fatty acids [FA0104]]                                   | methyl 10,12,13,15-bisepidioxy-16-hydroperoxy-8E-octadecenoate [Hydroperoxy fatty acids [FA0104]] |
| 1590 | 0.028032 | -0.798 | 299.113594 | 300.120870 | -0.109047 | 1  | Cb | C14H20O7  | Salidroside; p-Hydroxyphenethyl alcohol 1-O-β-D-glucoside; Tyrosol glucoside                                      |                                                                                                                                     |                                                                                                   |

**c) List of TOP 41 compounds identified HS *Np* vs NI (non-inoculated as control) from the significant 583 *m/z* at time A** selected with T-test (FDR=0.01 and S0=1). Total: 131 annotated compounds (128-/3+): Total 131 structure category counts: Ph:16; Lp:20; Cb:2; Pp:0; AmS:1; Nu:0; NM:2. The most specific compounds selected with higher stringency (FDR=0.08 and S0=1) are indicated in bolded lines. TOPs 41 functional category counts: Ph:66; Lp:18; Cb:33; Pp:3; AmS:3; Nu:1; NM:7.

| ID   | T-test<br><i>p-value</i> | HS<br><i>Np-NI</i> | <i>m/z</i> | Mass       | error<br>(ppm) | n  | Cat. | Formula   | Identifications                                                                                                     |                                                     |                                                                  |
|------|--------------------------|--------------------|------------|------------|----------------|----|------|-----------|---------------------------------------------------------------------------------------------------------------------|-----------------------------------------------------|------------------------------------------------------------------|
| 93   | 0.000183                 | +1.920             | 181.050603 | 182.057880 | -0.160171      | 17 | Ph   | C9H10O4   | 3-(4-Hydroxyphenyl)lactate; 4-Hydroxyphenyllactate; p-Hydroxyphenyllactate; 2-Hydroxy-3-(4-hydroxyphenyl)propanoate | (R)-3-(4-Hydroxyphenyl)lactate                      | 3-(2,3-Dihydroxyphenyl)propanoate; 2,3-Dihydroxyphenylpropanoate |
| 8177 | 0.010349                 | +1.845             | 685.481404 | 686.488680 | 0.035433       | 14 | Lp   | C38H71O8P | PA(13:0/22:2(13Z,16Z)); 1-tridecanoyl-2-(13Z,16Z-                                                                   | PA(15:0/20:2(11Z,14Z)); 1-pentadecanoyl-2-(11Z,14Z- | PA(15:1(9Z)/20:1(11Z)); 1-(9Z-pentadecenoyl)-2-(11Z-             |

|      |          |        |            |            |           |    |     |              |                                                                                                                   |                                                                                    |                                                                                           |
|------|----------|--------|------------|------------|-----------|----|-----|--------------|-------------------------------------------------------------------------------------------------------------------|------------------------------------------------------------------------------------|-------------------------------------------------------------------------------------------|
|      |          |        |            |            |           |    |     |              | docosadienoyl)-glycero-3-phosphate<br>[Diacylglycerophosphates<br>[GP1001]]                                       | eicosadienoyl)-glycero-3-phosphate<br>[Diacylglycerophosphates<br>[GP1001]]        | eicosenoyl)-glycero-3-phosphate<br>[Diacylglycerophosphates<br>[GP1001]]                  |
| 2579 | 0.001213 | -2.455 | 339.129643 | 340.136919 | -0.081507 | 1  | Cb  | C13H24O10    | Methyl-2- $\alpha$ -L-fucopyranosyl- $\beta$ -D-galactoside                                                       |                                                                                    |                                                                                           |
| 1677 | 0.002185 | -2.438 | 303.050993 | 304.058270 | -0.108829 | 7  | Ph  | C15H12O7     | Taxifolin; Dihydroquercetin; (+)-Dihydroquercetin; (+)-Taxifolin; <i>trans</i> -Dihydroquercetin                  | Pentahydroxyflavanone; Dihydrotricetin                                             | <i>cis</i> -Dihydroquercetin                                                              |
| 2347 | 0.044133 | -2.354 | 330.119400 | 331.126676 | -0.122722 | 1  | AmS | C14H21NO8    | 5'-O- $\beta$ -D-Glucosylpyridoxine                                                                               |                                                                                    |                                                                                           |
| 5361 | 0.034364 | -2.318 | 461.202845 | 462.210121 | 0.020421  | 2  | Cb  | C21H34O11    | Patrinoside                                                                                                       | Valerosidatum; Valerosidate                                                        |                                                                                           |
| 1158 | 0.011871 | -2.272 | 271.061181 | 272.068458 | -0.058348 | 37 | Ph  | C15H12O5     | Naringenin; 4',5,7-Trihydroxyflavanone                                                                            | (6aS,11aS)-3,6a,9-Trihydroxypterocarpan; 3,6,9-Trihydroxypterocarpan; (-)-Glycinol | Licodione                                                                                 |
| 4814 | 0.004251 | -2.258 | 431.155905 | 432.163181 | 0.044900  | 1  | Cb  | C19H28O11    | Zizybeoside I                                                                                                     |                                                                                    |                                                                                           |
| 11   | 0.007951 | -2.180 | 161.045532 | 162.052809 | -0.091525 | 30 | Cb  | C6H10O5      | Lichenin; Lichenan                                                                                                | (R)-3,3-Dimethylmalate                                                             | 3-Ethylmalate                                                                             |
| 65   | 0.013675 | -2.147 | 177.019326 | 178.026603 | -0.033633 | 4  | Ph  | C9H6O4       | 7,8-Dihydroxycoumarin; Daphnetin                                                                                  | 5,7-Dihydroxychromone                                                              | Esculetin; Aesculetin                                                                     |
| 5431 | 0.008132 | -2.144 | 465.103882 | 466.111159 | 0.069908  | 6  | Ph  | C21H22O12    | Quercetin 7-O-glucoside                                                                                           | Plantagoside                                                                       | 3,4,5,2',4',6'-Hexahydroxychalcone 2'-glucoside [Chalcones and dihydrochalcones [PK1212]] |
| 51   | 0.011332 | -2.107 | 173.009145 | 174.016422 | -0.092226 | 6  | Ph  | C6H6O6       | <i>cis</i> -Aconitate; <i>cis</i> -Aconitic acid                                                                  | <i>trans</i> -Aconitate; <i>trans</i> -Aconitic acid                               | Dehydroascorbate; Dehydroascorbic acid; L-Dehydroascorbate; L-Dehydroascorbic acid        |
| 2893 | 0.000054 | -2.104 | 350.306446 | 351.313723 | -0.019531 | 1  | Lp  | C22H41NO2    | Anandamide (20:2, n-6); N-(11Z,14Z-eicosadienoyl)-ethanolamine [N-acyl ethanolamines (endocannabinoids) [FA0804]] |                                                                                    |                                                                                           |
| 928  | 0.013838 | -2.092 | 263.128852 | 264.136128 | -0.116493 | 33 | Ph  | C15H20O4     | Abcisate; Absciscic acid; (+)-Absciscic acid                                                                      | Amaralin                                                                           | Artemisiifolin                                                                            |
| 4627 | 0.002328 | -2.091 | 421.114055 | 422.121331 | 0.081091  | 7  | Ph  | C20H22O10    | Catechin 7-O- $\beta$ -D-xyloside                                                                                 | Plicatic acid                                                                      | Catechin 7-O- $\beta$ -D-xyloside [Flavans, Flavanols and Leucoanthocyanidins [PK1202]]   |
| 4027 | 0.005346 | -2.088 | 391.160971 | 392.168248 | 0.453424  | 1  | NM  | C21H27ClN2O3 | Cl37 isotope of Compound II(R/S); 5-(7-(6-Chloro-4-(5-                                                            |                                                                                    |                                                                                           |

|             |          |               |                   |                   |                  |           |           |                  |                                                                                                                                                          |                                                                                                                                                                                            |                                                                                                                                   |
|-------------|----------|---------------|-------------------|-------------------|------------------|-----------|-----------|------------------|----------------------------------------------------------------------------------------------------------------------------------------------------------|--------------------------------------------------------------------------------------------------------------------------------------------------------------------------------------------|-----------------------------------------------------------------------------------------------------------------------------------|
| 3049        | 0.023822 | -2.081        | 355.103413        | 356.110690        | -0.119119        | 3         | Ph        | C16H20O9         | <i>hydro-4-methyl-2-oxazolyl)phenoxy)heptyl)-3-methylisoxazole</i><br>Gentiopicrin; Gentiopicroside                                                      | 1-O-Feruloyl-β-D-glucose; 1-Feruloyl-D-glucose                                                                                                                                             | Gentiopicrin (see KEGG C09782) [C10 isoprenoids (monoterpenes) [PR0102]]                                                          |
| 2277        | 0.020385 | -2.081        | 327.163515        | 328.170791        | -0.119791        | 1         | Lp        | C17H28O4S        | Steryl sulfate                                                                                                                                           |                                                                                                                                                                                            |                                                                                                                                   |
| 4847        | 0.021465 | -2.075        | 433.114041        | 434.121318        | 0.048061         | 32        | Ph        | C21H22O10        | Naringenin 7-O-β-D-glucoside; Prunin                                                                                                                     | Phlorizin chalcone; Chalcone 2'-O-glucoside                                                                                                                                                | 2',4,4',6'-Tetrahydrochalcone 4'-O-glucoside; THC 4'-glucoside                                                                    |
| 2506        | 0.012550 | -2.069        | 336.129968        | 337.137244        | -0.110462        | 3         | AmS       | C13H23NO9        | Streptobiosamine                                                                                                                                         |                                                                                                                                                                                            |                                                                                                                                   |
| 3153        | 0.016177 | -2.052        | 359.134719        | 360.141996        | -0.102120        | 2         | Ph        | C16H24O9         | 7-Deoxyloganate                                                                                                                                          | 8-Epideoxyloganic acid                                                                                                                                                                     |                                                                                                                                   |
| <b>5064</b> | 0.001825 | <b>-2.048</b> | <b>445.190118</b> | <b>446.197394</b> | <b>-0.100135</b> | <b>1</b>  | <b>Lp</b> | <b>C21H34O8S</b> | <b>Ptilosteroid A; 5α-pregn-20-en-2β,3β,4β,15β,16β-pentol 2-sulfate [C21 steroids (gluco/mineralocorticoids, progestogens) and derivatives [ST0203]]</b> |                                                                                                                                                                                            |                                                                                                                                   |
| 3922        | 0.003605 | -2.042        | 387.166034        | 388.173310        | -0.057526        | 2         | Lp        | C18H28O9         | Tuberonic acid glucoside                                                                                                                                 | Tuberonic acid glucoside (see KEGG C08558); (1R,2S)-3-oxo-2-(5'-O-β-D-glucopyranosyloxy-2''Z-pentenyl)-cyclopentaneacetic acid [Fatty acyl glycosides of mono- and disaccharides [FA1301]] |                                                                                                                                   |
| 5133        | 0.007019 | -2.027        | 449.108952        | 450.116229        | 0.038519         | 25        | Ph        | C21H22O11        | Neoastilbin; (2S,3S)-Taxifolin 3-rhamnoside                                                                                                              | 2',3,4,4',6'-Peptahydrochalcone 4'-O-glucoside; PHC 4'-O-glucoside                                                                                                                         | Astilbin                                                                                                                          |
| <b>80</b>   | 0.000435 | <b>-1.984</b> | <b>179.056091</b> | <b>180.063368</b> | <b>-0.114407</b> | <b>69</b> | <b>Cb</b> | <b>C6H12O6</b>   | <b>D-Glucose; Grape sugar; Dextrose</b>                                                                                                                  | <b>D-Fructose; Levulose; Fruit sugar; D-arabino-Hexulose</b>                                                                                                                               | <b>D-Galactose</b>                                                                                                                |
| 4511        | 0.005081 | -1.967        | 413.218120        | 414.225397        | 0.069673         | 3         | Lp        | C21H34O8         | methyl 5-hydroperoxy-6,8,9,11-bisepidioxy-12,14-eicosadienoate [Hydroperoxy fatty acids [FA0104]]                                                        | methyl 9,11-epidioxy-12,15-dihydroperoxy-5,7,13-eicosatrienoate [Hydroxy/hydroperoxyeicosatrienoic acids [FA0305]]                                                                         | methyl 6,8-epidioxy-5,15-dihydroperoxy-9,11,13-eicosatrienoate [Hydroxy/hydroperoxyeicosatrienoic acids [FA0305]]                 |
| 8870        | 0.005483 | -1.918        | 833.518322        | 834.525598        | -0.277170        | 23        | Lp        | C43H79O13P       | PI(16:0/18:2(9Z,12Z)) (see KEGG C00626); 1-hexadecanoyl-2-(9Z,12Z-octadecadienoyl)-sn-glycero-3-phosphoinositol [secondary alcohol]                      | PI(16:1(9Z)/18:1(11Z)) (see KEGG C00626); 1-(9Z-hexadecenoyl)-2-(11Z-octadecenoyl)-sn-glycero-3-phosphoinositol [secondary alcohol]                                                        | PI(16:1(9Z)/18:1(9Z)) (see KEGG C00626); 1-(9Z-hexadecenoyl)-2-(9Z-octadecenoyl)-sn-glycero-3-phosphoinositol [secondary alcohol] |
| <b>7603</b> | 0.000011 | <b>-1.906</b> | <b>623.255794</b> | <b>624.263070</b> | <b>0.216834</b>  | <b>1</b>  | <b>Cb</b> | <b>C27H44O16</b> | <b>Kanokoside D</b>                                                                                                                                      |                                                                                                                                                                                            |                                                                                                                                   |



|      |          |        |            |            |           |    |    |           |                                                                                                                                                                |                                                                                                          |                                                                                                         |
|------|----------|--------|------------|------------|-----------|----|----|-----------|----------------------------------------------------------------------------------------------------------------------------------------------------------------|----------------------------------------------------------------------------------------------------------|---------------------------------------------------------------------------------------------------------|
| 6367 | 0.010584 | -1.879 | 519.187226 | 520.194503 | 0.078545  | 2  | Ph | C26H32O11 | Brusatol                                                                                                                                                       | (-)-Pinoresinol glucoside                                                                                |                                                                                                         |
| 1303 | 0.006311 | -1.835 | 281.139425 | 282.146702 | -0.078970 | 6  | Ph | C15H22O5  | Hymenoxon                                                                                                                                                      | Qing Hau Sau; Artemisinin                                                                                | Dihydrophaseic acid; (-)-Dihydrophaseic acid                                                            |
| 3972 | 0.001427 | -1.830 | 389.181684 | 390.188961 | -0.055764 |    | Lp | C18H30O9  | (-)-11-hydroxy-9,10-dihydrojasmonic acid 11-β-D-glucoside; {(1R,2R)-2-[4-(β-D-glucopyranosyloxy)pentyl]-3-oxocyclopentyl}acetic acid [Jasmonic acids [FA0202]] |                                                                                                          |                                                                                                         |
| 4021 | 0.007441 | -1.828 | 391.124562 | 392.131838 | -0.059958 | 1  | Ph | C16H24O11 | Shanzhiside                                                                                                                                                    |                                                                                                          |                                                                                                         |
| 2745 | 0.009898 | -1.822 | 345.119057 | 346.126333 | -0.142585 | 4  | Lp | C15H22O9  | Aucubin                                                                                                                                                        | Deutzioside                                                                                              | Aucubin (see KEGG C09771) [C10 isoprenoids (monoterpenes) [PR0102]]                                     |
| 449  | 0.009663 | -1.808 | 243.066250 | 244.073527 | -0.131492 | 10 | Ph | C14H12O4  | 3,3',4'5-Tetrahydroxystilbene; Piceatannol                                                                                                                     | Wyerone acid                                                                                             | Eriobofuran                                                                                             |
| 6042 | 0.000000 | -1.751 | 499.291301 | 500.298577 | 0.088261  | 1  | NM | C26H44O9  | Mupirocin                                                                                                                                                      |                                                                                                          |                                                                                                         |
| 3508 | 0.001932 | -1.751 | 371.243903 | 372.251179 | -0.025932 | 5  | Lp | C20H36O6  | 8,8a-Deoxyoleandolide                                                                                                                                          | 19(R)-hydroxy-PGF1α; 9S,11R,15S,19R-tetrahydroxy-13E-prostaenoic acid [Prostaglandins [FA0301]]          | 13,14-dihydro-19(R)-hydroxyPGE1; 9-oxo-11R,15S,19R-trihydroxy-prostanoic acid [Prostaglandins [FA0301]] |
| 4022 | 0.007294 | -1.742 | 391.128449 | 392.135726 | 0.030165  | 5  | Ph | C20H22O8  | O18 isotope of Piceid; Polydatin; 3,4,5-Trihydroxystilbene-3-β-monoglucoside                                                                                   | O18 isotope of Populin                                                                                   | O18 isotope of Apigeniflavan 5-O-xyloside [Flavans, Flavanols and Leucoanthocyanidins [PK1202]]         |
| 5691 | 0.006981 | -1.739 | 481.098785 | 482.106061 | 0.042399  | 1  | Ph | C21H22O13 | 3,4,2',3',4',6',α-Heptahydroxychalcone 2'-glucoside [Chalcones and dihydrochalcones [PK1212]]                                                                  |                                                                                                          |                                                                                                         |
| 4329 | 0.001465 | -1.712 | 405.082709 | 406.089985 | -0.028041 | 7  | Ph | C19H18O10 | Lancerin; 4-C-Glucosyl-1,3,7-trihydroxyxanthone                                                                                                                | 5,7,3',5'-Tetrahydroxy-3,6,8,4'-tetramethoxyflavone [Flavones and Flavonols [PK1211]]                    | 5,7,3',4'-Tetrahydroxy-3,6,8,5'-tetramethoxyflavone [Flavones and Flavonols [PK1211]]                   |
| 4594 | 0.004359 | -1.690 | 419.134784 | 420.142061 | 0.067492  | 10 | Ph | C21H24O9  | Melampodin A                                                                                                                                                   | Glycyphyllin; Phloretin 2'-O-rhamnoside                                                                  | Isorhapontin                                                                                            |
| 2276 | 0.002669 | -1.688 | 327.144911 | 328.152188 | -0.047159 | 3  | Ph | C16H24O7  | Rhododendrin                                                                                                                                                   | Tetranor-PGEM; 11R-hydroxy-9,15-dioxo-2,3,4,5-tetranor-prostan-1,20-dioic acid [Prostaglandins [FA0301]] | Prostaglandin M; 7R-hydroxy-5,11-dioxotetranorprostane-1,16-dioic acid [Prostaglandins [FA0301]]        |



**d) List of TOP 39 identified WSHS *Np* vs NI (non-inoculated as control) from the significant 882 *m/z* at time A** selected with T-test (FDR=0.0001 and S0=3). Total: 187 annotated compounds (181-/6+): Total 187 functional category counts: Ph:102; Lp:25; Cb:37; Pp:6; AmS:6; Nu:1; NM:10. TOPs 39 functional category counts: Ph:19; Lp:5; Cb:9; Pp:2; AmS:0; Nu:0; NM:4.

| ID   | T-test<br><i>p-value</i> | WSHS<br><i>Np-NI</i> | <i>m/z</i> | Mass       | error<br>(ppm) | n  | Cat. | Formula    | Identifications                                                                                                                                                                                                                      |                                                                                                               |                                                                                                                                                         |
|------|--------------------------|----------------------|------------|------------|----------------|----|------|------------|--------------------------------------------------------------------------------------------------------------------------------------------------------------------------------------------------------------------------------------|---------------------------------------------------------------------------------------------------------------|---------------------------------------------------------------------------------------------------------------------------------------------------------|
| 502  | 0.00252                  | +3.023               | 247.047368 | 248.054644 | -0.228030      | 1  | Lp   | C6H15O8P   | O18 isotope of<br>Glycerophosphoglycerol                                                                                                                                                                                             |                                                                                                               |                                                                                                                                                         |
| 2474 | 0.008504                 | +2.930               | 335.063417 | 336.070694 | -0.151416      | 5  | Cb   | C9H19O11P  | O18 isotope of <i>sn</i> -glycero-3-<br>Phospho-1-inositol; 1-( <i>sn</i> -<br>glycero-3-Phospho)-1D-myo-<br>inositol                                                                                                                | O18 isotope of 2-( $\alpha$ -D-<br>Galactosyl)- <i>sn</i> -glycerol 3-<br>phosphate                           | O18 isotope of $\alpha$ -D-Galactosyl-<br>(1,1')- <i>sn</i> -glycerol 3-phosphate; 1-<br>O- $\alpha$ -D-Galactosyl- <i>sn</i> -glycerol 3-<br>phosphate |
| 7699 | 0.000388                 | -2.997               | 633.073451 | 634.080728 | 0.180016       | 1  | Ph   | C27H22O18  | Corilagin                                                                                                                                                                                                                            |                                                                                                               |                                                                                                                                                         |
| 5781 | 0.001096                 | -2.818               | 485.108961 | 486.116238 | 0.054370       | 2  | Ph   | C24H22O11  | Flavonol 3-O-(6-O-malonyl- $\beta$ -D-<br>glucoside)                                                                                                                                                                                 | Epigallocatechin 3-O-(3,5-di-O-<br>methylgallate) [Flavans,<br>Flavanols and<br>Leucoanthocyanidins [PK1202]] |                                                                                                                                                         |
| 4393 | 0.014393                 | -2.795               | 407.171139 | 408.178415 | -0.005805      | 2  | Ph   | C21H28O8   | Vernoflexuoside                                                                                                                                                                                                                      |                                                                                                               |                                                                                                                                                         |
| 4717 | 0.032512                 | -2.791               | 425.087827 | 426.095103 | 0.049636       | 2  | Ph   | C22H18O9   | Epiafzelechin 3-O-gallate<br>[Flavans, Flavanols and<br>Leucoanthocyanidins [PK1202]]                                                                                                                                                | Epigallocatechin 3-O-(4-<br>hydroxybenzoate) [Flavans,<br>Flavanols and<br>Leucoanthocyanidins [PK1202]]      |                                                                                                                                                         |
| 1087 | 0.000557                 | -2.766               | 265.144542 | 266.151818 | 0.677275       | 6  | Pp   | C14H20N2O3 | O18 isotope of Subaphyllin;<br><i>Feruloylputrescine</i>                                                                                                                                                                             | <i>Mukaadial</i>                                                                                              | <i>Rugosal</i>                                                                                                                                          |
| 4985 | 0.015744                 | -2.728               | 441.082837 | 442.090114 | 0.264769       | 10 | Ph   | C22H18O10  | Robinetinidol 3-O-gallate<br>[Flavans, Flavanols and<br>Leucoanthocyanidins [PK1202]]                                                                                                                                                | ent-Robinetinidol 3-O-gallate<br>[Flavans, Flavanols and<br>Leucoanthocyanidins [PK1202]]                     | Catechin 3-O-gallate [Flavans,<br>Flavanols and<br>Leucoanthocyanidins [PK1202]]                                                                        |
| 5457 | 0.022641                 | -2.645               | 467.098394 | 468.105671 | 0.051411       | 2  | Ph   | C24H20O10  | Epigallocatechin 3-O-caffeate<br>[Flavans, Flavanols and<br>Leucoanthocyanidins [PK1202]]                                                                                                                                            | Apocynin A [Flavans, Flavanols<br>and Leucoanthocyanidins<br>[PK1202]]                                        |                                                                                                                                                         |
| 291  | 0.007195                 | -2.619               | 221.066628 | 222.073904 | -0.220142      | 4  | Cb   | C8H14O7    | 6-Acetyl-D-glucose                                                                                                                                                                                                                   | 6-Acetyl- $\beta$ -D-galactoside                                                                              | Ethyl glucuronide;<br>(2S,3S,4S,5R)-6-ethoxy-3,4,5-<br>trihydroxyoxane-2-carboxylic<br>acid [acetal]<br>Robinobiose                                     |
| 2222 | 0.002763                 | -2.601               | 325.113981 | 326.121258 | -0.120525      | 6  | Cb   | C12H22O10  | $\alpha$ -L-Fucosyl-1,2- $\beta$ -D-galactoside;<br>Glycoprotein $\alpha$ -L-fucosyl-(1,2)-<br>D-galactose; Glycolipid $\alpha$ -L-<br>fucosyl-1,2- $\beta$ -D-galactose; $\alpha$ -L-<br>Fucosyl-(1 $\rightarrow$ 2)-D-galactosyl-R | 2-O- $\alpha$ -L-Rhamnopyranosyl-D-<br>glucopyranose; Neohesperidose                                          |                                                                                                                                                         |
| 1130 | 0.000774                 | -2.584               | 269.045564 | 270.052841 | 0.064429       | 42 | Ph   | C15H10O5   | Apigenin; 4',5,7-<br>Trihydroxyflavone; 5,7,4'-<br>Trihydroxyflavone                                                                                                                                                                 | 2'-Hydroxydaidzein                                                                                            | Genistein; 5,7,4'-<br>Trihydroxyisoflavone                                                                                                              |
| 1622 | 0.011095                 | -2.589               | 300.998953 | 302.006230 | -0.124868      | 2  | Ph   | C14H6O8    | Ellagic acid                                                                                                                                                                                                                         | Ellagic acid (see KEGG C10788)<br>[phenol or hydroxyhetarene]                                                 |                                                                                                                                                         |
| 1135 | 0.002842                 | -2.546               | 269.081904 | 270.089181 | -0.104475      | 35 | Lp   | C16H14O4   | (+)-Medicarpin; 3-Hydroxy-9-<br>methoxypterocarpan                                                                                                                                                                                   | Vignafuran                                                                                                    | Alloimperatorin                                                                                                                                         |
| 4289 | 0.007513                 | -2.539               | 403.124570 | 404.131847 | -0.036646      | 2  | Ph   | C17H24O11  | Gardenoside                                                                                                                                                                                                                          | Scandoside methyl ester                                                                                       |                                                                                                                                                         |

|      |          |        |            |            |           |    |    |              |                                                                                                                                                                 |                                                                                                                                         |                                                                                              |
|------|----------|--------|------------|------------|-----------|----|----|--------------|-----------------------------------------------------------------------------------------------------------------------------------------------------------------|-----------------------------------------------------------------------------------------------------------------------------------------|----------------------------------------------------------------------------------------------|
| 233  | 0.008054 | -2.480 | 211.133944 | 212.141220 | -0.115861 | 15 | Lp | C12H20O3     | Cucurbic acid                                                                                                                                                   | Putaminoxin                                                                                                                             | Traumatin; (10E)-12-Oxododecenoic acid                                                       |
| 1843 | 0.000007 | -2.474 | 310.093192 | 311.100468 | -0.108516 | 4  | Ph | C14H17NO7    | Taxiphyllin; (R)-4-Hydroxymandelonitrile $\beta$ -D-glucoside                                                                                                   | Dhurrin; (S)-4-Hydroxymandelonitrile $\beta$ -D-glucoside                                                                               | p-Glucosyloxymandelonitrile                                                                  |
| 5778 | 0.000002 | -2.458 | 485.082492 | 486.089768 | 0.446498  | 1  | Cb | C20H20O14    | O18 isotope of 1-O,6-O-Digalloyl- $\beta$ -D-glucose                                                                                                            |                                                                                                                                         |                                                                                              |
| 3121 | 0.005300 | -2.451 | 358.114330 | 359.121606 | -0.070431 | 1  | Pp | C15H21NO9    | Epinephrine glucuronide (see KEGG C03033); (2S,3S,4S,6S)-3,4,5,5-tetrahydroxy-3-[(1R)-1-hydroxy-2-methylaminoethyl]-6-(phenoxy)oxane-2-carboxylic acid [acetal] |                                                                                                                                         |                                                                                              |
| 4441 | 0.001599 | -2.412 | 409.150412 | 410.157688 | 0.014166  | 2  | Ph | C20H26O9     | Bruceine D                                                                                                                                                      | C20H26O9                                                                                                                                |                                                                                              |
| 132  | 0.000032 | -2.410 | 191.034952 | 192.042228 | -0.159394 | 10 | Ph | C10H8O4      | Scopoletin                                                                                                                                                      | Naphthazarin; 5,8-Dihydroxy-1,4-naphthoquinone                                                                                          | 3,4-Dehydro-6-hydroxymellein                                                                 |
| 2684 | 0.000005 | -2.383 | 343.124543 | 344.131820 | -0.121434 | 4  | Cb | C12H24O11    | Melibiiitol; 6-O- $\alpha$ -D-Galactosyl-D-glucitol                                                                                                             | Clusianose                                                                                                                              | Maltitol; 4-[3,4,5-trihydroxy-6-(hydroxymethyl)oxan-2-yl]oxyhexane-1,2,3,5,6-pentol [acetal] |
| 3969 | 0.007159 | -2.378 | 389.145306 | 390.152582 | 0.415595  | 4  | NM | C21H25ClN2O3 | Cl37 isotope of Cetirizine                                                                                                                                      | Cl37 isotope of Cetirizine (see KEGG C07778); 2-[2-[4-[(4-chlorophenyl)-phenyl-methyl]piperazin-1-yl]ethoxy]acetic acid [dialkyl ether] | Loganin                                                                                      |
| 3099 | 0.000347 | -2.369 | 357.107697 | 358.114974 | -0.013607 | 4  | Ph | C16H20O9     | O18 isotope of Gentiopicrocin; Gentiopicroside                                                                                                                  | O18 isotope of 1-O-Feruloyl- $\beta$ -D-glucose; 1-Feruloyl-D-glucose                                                                   | O18 isotope of Gentiopicrocin (see KEGG C09782) [C10 isoprenoids (monoterpenes)] [PR0102]]   |
| 6042 | 0.000214 | -2.337 | 499.291301 | 500.298577 | 0.088261  | 1  | NM | C26H44O9     | Mupirocin                                                                                                                                                       |                                                                                                                                         |                                                                                              |
| 4635 | 0.002498 | -2.320 | 421.186827 | 422.194104 | 0.084740  | 4  | Ph | C22H30O8     | Valtratum; Valtrate                                                                                                                                             | Isovaltrate                                                                                                                             | Picrasin F                                                                                   |
| 3088 | 0.001545 | -2.319 | 357.061579 | 358.068856 | -0.032332 | 10 | Ph | C18H14O8     | 5,3'-Dihydroxy-4',5'-dimethoxy-6,7-methylenedioxyisoflavone [Isoflavonoids [PK1205]]                                                                            | Dalpalatin [Isoflavonoids [PK1205]]                                                                                                     | Luteolin 7-lactate [Flavones and Flavonols [PK1211]]                                         |
| 6216 | 0.003172 | -2.313 | 511.218562 | 512.225838 | 0.149097  | 1  | Ph | C25H36O11    | gibberellin A2 O- $\beta$ -D-glucoside [C20 isoprenoids (diterpenes)] [PR0104]]                                                                                 |                                                                                                                                         |                                                                                              |
| 1138 | 0.001137 | -2.284 | 269.175813 | 270.183090 | -0.072009 | 1  | Lp | C15H26O4     | (10S)-Juvenile hormone III acid diol                                                                                                                            |                                                                                                                                         |                                                                                              |
| 2893 | 0.001210 | -2.258 | 350.306446 | 351.313723 | -0.019531 | 1  | Lp | C22H41NO2    | Anandamide (20:2, n-6); N-(11Z,14Z-eicosadienoyl)-ethanolamine [N-acyl ethanolamines (endocannabinoids)] [FA0804]]                                              |                                                                                                                                         |                                                                                              |
| 4730 | 0.000106 | -2.237 | 425.181737 | 426.189014 | 0.073384  | 2  | Ph | C21H30O9     | Abscisic acid glucose ester; abscisic acid- $\beta$ -D-glucopyranosyl ester                                                                                     | $\gamma$ -CEHC Glc; $\gamma$ -carboxyethyl-hydroxychroman $\beta$ -D-glucoside [Vitamin E [PR0202]]                                     |                                                                                              |
| 11   | 0.000069 | -2.234 | 161.045532 | 162.052809 | -0.091525 | 30 | Cb | C6H10O5      | Lichenin; Lichenan                                                                                                                                              | (R)-3,3-Dimethylmalate                                                                                                                  | 3-Ethylmalate                                                                                |
| 3918 | 0.000909 | -2.229 | 387.129645 | 388.136921 | -0.066108 | 5  | Cb | C17H24O10    | Secologanin; (-)-Secologanin                                                                                                                                    | Geniposide                                                                                                                              | Verbenalin; Cornin (glycoside)                                                               |

|      |          |        |            |            |           |   |    |            |                                                                      |                                                                                      |                                        |
|------|----------|--------|------------|------------|-----------|---|----|------------|----------------------------------------------------------------------|--------------------------------------------------------------------------------------|----------------------------------------|
| 306  | 0.000004 | -2.204 | 223.133928 | 224.141204 | -0.180408 | 8 | Ph | C13H20O3   | Vomifolioside; (6S,9R)-6-hydroxy-3-oxo- $\alpha$ -ionol              | (+/-)-6-Hydroxy-3-oxo- $\alpha$ -ionol                                               | Methyl jasmonate; (-)-Methyl jasmonate |
| 6299 | 0.000011 | -2.172 | 515.286219 | 516.293495 | 0.092665  | 2 | Lp | C26H44O10  | L-Olivosyl-oleandolide                                               | L-Olivosyl-oleandolide (see KEGG C11991) [Macrolides and lactone polyketides [PK04]] |                                        |
| 1869 | 0.000018 | -2.162 | 313.147866 | 314.155142 | 0.528679  | 1 | NM | C19H23ClN2 | Clomipramine                                                         |                                                                                      |                                        |
| 1252 | 0.000042 | -2.153 | 277.144506 | 278.151783 | -0.095744 | 7 | NM | C16H22O4   | 2-Ethylhexyl phthalate                                               | Dibutyl phthalate; Di-n-butyl phthalate; Dibutyl 1,2-benzenedicarboxylate            | Diisobutyl phthalate; DIBP             |
| 4597 | 0.000028 | -2.126 | 419.155889 | 420.163166 | 0.009385  | 2 | Ph | C18H28O11  | Lamioside                                                            | Lamioside (see KEGG C11645) [C10 isoprenoids (monoterpenes) [PR0102]]                |                                        |
| 3598 | 0.000034 | -2.111 | 375.202440 | 376.209716 | -0.005151 | 1 | Cb | C18H32O8   | 2,3-di--hexanoyl- $\alpha$ -glucopyranose [Other acyl sugars [SL05]] |                                                                                      |                                        |

## TABLES IDENTIFIED *Ds* COMPOUNDS

e) List of 25 identified “No abiotic stress” (NAS) *Ds* vs NI (non-inoculated as control) from the significant 135 *m/z* at time B selected with T-test (FDR=0.05 and S0=0).

Total 25 functional category counts: Ph:12; Lp:4; Cb:7; Pp:0; AmS:1; Nu:1; NM:0.

| ID   | T-test<br><i>p-value</i> | NAS<br><i>Ds-NI</i> | <i>m/z</i> | Mass       | error<br>(ppm) | n  | Cat. | Formula    | Identifications                                                                                              |                                                                           |                                                                                       |
|------|--------------------------|---------------------|------------|------------|----------------|----|------|------------|--------------------------------------------------------------------------------------------------------------|---------------------------------------------------------------------------|---------------------------------------------------------------------------------------|
| 7463 | 0.004622                 | -2.686              | 609.188462 | 610.195738 | 0.997565       | 1  | Ph   | C34H30N2O9 | Atalanine                                                                                                    |                                                                           |                                                                                       |
| 3591 | 0.022328                 | -2.367              | 375.129648 | 376.136925 | -0.059642      | 3  | Ph   | C16H24O10  | Loganate; Loganic acid                                                                                       | 7-Epiloganic acid                                                         |                                                                                       |
| 5540 | 0.019670                 | -2.302              | 472.146076 | 473.153353 | 0.058057       | 1  | Ph   | C20H27NO12 | Proteacin                                                                                                    |                                                                           |                                                                                       |
| 3851 | 0.001480                 | -2.301              | 385.077611 | 386.084888 | -0.061436      | 1  | Ph   | C16H18O11  | O-Feruloylgalactarate; O-Feruloylgalactaric acid; 2'-(E)-O-Feruloylgalactaric acid                           |                                                                           |                                                                                       |
| 2347 | 0.000273                 | -2.287              | 330.119400 | 331.126676 | -0.122722      | 1  | AmS  | C14H21NO8  | 5'-O- $\beta$ -D-Glucosylpyridoxine                                                                          |                                                                           |                                                                                       |
| 3153 | 0.022575                 | -2.279              | 359.134719 | 360.141996 | -0.102120      | 2  | Ph   | C16H24O9   | 7-Deoxyloganate                                                                                              | 8-Epideoxyloganic acid                                                    |                                                                                       |
| 1590 | 0.035859                 | -2.233              | 299.113594 | 300.120870 | -0.109047      | 1  | Cb   | C14H20O7   | Salidroside; p-Hydroxyphenethyl alcohol 1-O- $\beta$ -D-glucoside; Tyrosol glucoside                         |                                                                           |                                                                                       |
| 2681 | 0.042487                 | -2.173              | 343.113128 | 344.120404 | -0.156273      | 45 | Cb   | C12H22O11  | O18 isotope of Sucrose; Cane sugar; Saccharose; 1- $\alpha$ -D-Glucopyranosyl-2- $\beta$ -D-fructofuranoside | O18 isotope of Cellobiose; 1- $\beta$ -D-Glucopyranosyl-4-D-glucopyranose | O18 isotope of Maltose; Malt sugar; $\alpha$ -D-Glucopyranosyl-(1->4)-D-glucopyranose |
| 2745 | 0.004061                 | -2.156              | 345.119057 | 346.126333 | -0.142585      | 4  | Lp   | C15H22O9   | Aucubin                                                                                                      | Deutzioside                                                               | Aucubin (see KEGG C09771) [C10 isoprenoids (monoterpenes) [PR0102]]                   |
| 2614 | 0.027651                 | -1.971              | 341.108884 | 342.116161 | -0.149462      | 45 | Cb   | C12H22O11  | Sucrose; Cane sugar; Saccharose; 1- $\alpha$ -D-Glucopyranosyl-2- $\beta$ -D-fructofuranoside                | Cellobiose; 1- $\beta$ -D-Glucopyranosyl-4-D-glucopyranose                | Maltose; Malt sugar; $\alpha$ -D-Glucopyranosyl-(1->4)-D-glucopyranose                |

|      |          |        |            |            |           |    |    |            |                                                                                                                                                                                                                             |                                                                                                                                                                |                                                                                                                                                           |
|------|----------|--------|------------|------------|-----------|----|----|------------|-----------------------------------------------------------------------------------------------------------------------------------------------------------------------------------------------------------------------------|----------------------------------------------------------------------------------------------------------------------------------------------------------------|-----------------------------------------------------------------------------------------------------------------------------------------------------------|
| 3775 | 0.045960 | -1.871 | 382.100408 | 383.107685 | -0.072174 | 1  | Nu | C14H17N5O8 | Succinyladenosine; (2S)-2-[[9-<br>[(2S,3R,4S,5R)-3,4-dihydroxy-5-<br>(hydroxymethyl)oxolan-2-<br>yl]purin-6-yl]amino]butanedioic<br>acid [primary alcohol]                                                                  |                                                                                                                                                                |                                                                                                                                                           |
| 1864 | 0.018181 | -1.860 | 311.098334 | 312.105610 | -0.117249 | 6  | Cb | C11H20O10  | Vicianose; O- $\alpha$ -L-<br>Arabinopyranosyl-(1-6)-D-<br>glucopyranose                                                                                                                                                    | Arabino-galactose                                                                                                                                              | 6-O- $\beta$ -D-Xylopyranosyl-D-<br>glucose; Primeverose                                                                                                  |
| 8272 | 0.003918 | -1.639 | 697.481468 | 698.488745 | 0.127128  | 14 | Lp | C39H71O8P  | PA(14:1(9Z)/22:2(13Z,16Z)); 1-<br>(9Z-tetradecenoyl)-2-(13Z,16Z-<br>docosadienoyl)-glycero-3-<br>phosphate<br>[Diacylglycerophosphates<br>[GP1001]]                                                                         | PA(16:1(9Z)/20:2(11Z,14Z)); 1-<br>(9Z-hexadecenoyl)-2-(11Z,14Z-<br>eicosadienoyl)-glycero-3-<br>phosphate<br>[Diacylglycerophosphates<br>[GP1001]]             | PA(17:2(9Z,12Z)/19:1(9Z)); 1-<br>(9Z,12Z-heptadecadienoyl)-2-<br>(9Z-nonadecenoyl)-glycero-3-<br>phosphate<br>[Diacylglycerophosphates<br>[GP1001]]       |
| 8293 | 0.021010 | -1.567 | 699.497125 | 700.504401 | 0.135904  | 20 | Lp | C39H73O8P  | PA(18:1(18:2(9Z,12Z)) (see<br>KEGG C00416); 1-octadecanoyl-<br>2-(9Z,12Z-octadecadienoyl)-sn-<br>glycero-3-phosphate [carboxylic<br>acid ester]                                                                             | PA(18:1(11Z)/18:1(11Z)) (see<br>KEGG C00416); 1,2-di(11Z-<br>octadecenoyl)-rac-glycero-3-<br>phosphate [carboxylic acid ester]                                 | PA(18:1(11Z)/18:1(9Z)) (see<br>KEGG C00416); 1-(11Z-<br>octadecenoyl)-2-(9Z-<br>octadecenoyl)-sn-glycero-3-<br>phosphate [carboxylic acid ester]          |
| 1194 | 0.036655 | -1.551 | 274.056804 | 275.064080 | -0.131780 | 1  | Ph | C10H13NO8  | 3- $\beta$ -D-Glucopyranuronosyloxy-5-<br>methylisoxazole                                                                                                                                                                   |                                                                                                                                                                |                                                                                                                                                           |
| 3101 | 0.018617 | -1.520 | 357.119069 | 358.126345 | -0.103262 | 3  | Cb | C16H22O9   | Tarennoside                                                                                                                                                                                                                 | 10-Deoxygeniposidic acid                                                                                                                                       | Sweroside                                                                                                                                                 |
| 414  | 0.005905 | -1.488 | 239.056069 | 240.063345 | -0.178947 | 1  | Ph | C11H12O6   | (1R,6R)-6-Hydroxy-2-<br>succinylcyclohexa-2,4-diene-1-<br>carboxylate; (1R,6R)-2-Succinyl-<br>6-hydroxy-2,4-cyclohexadiene-1-<br>carboxylate; SHCHC                                                                         |                                                                                                                                                                |                                                                                                                                                           |
| 3454 | 0.001419 | -1.415 | 369.082692 | 370.089969 | -0.075560 | 1  | Ph | C16H18O10  | Fraxin                                                                                                                                                                                                                      |                                                                                                                                                                |                                                                                                                                                           |
| 5069 | 0.000031 | -1.191 | 445.368738 | 446.376015 | 0.043363  | 4  | Lp | C29H50O3   | 13'-hydroxy- $\alpha$ -tocopherol<br>[primary alcohol]                                                                                                                                                                      | Nebrosteroid M; 4 $\alpha$ -methyl-24-<br>methylene-cholestan-3 $\beta$ ,8 $\beta$ ,11 $\beta$ -<br>triol [Ergosterols and C24-methyl<br>derivatives [ST0103]] | 24-hydroperoxy-24-<br>vinylcholesterol; 24-<br>hydroperoxy-24-vinyl-cholest-5-<br>en-3 $\beta$ -ol [Stigmasterols and C24-<br>ethyl derivatives [ST0104]] |
| 2373 | 0.027657 | -0.876 | 331.067028 | 332.074304 | -0.128768 | 1  | Cb | C13H16O10  | 1-O-Galloyl- $\beta$ -D-glucose; 1-<br>Galloyl- $\beta$ -glucose; $\beta$ -Glucogallin;<br>1-Galloyl- $\beta$ -D-glucose                                                                                                    |                                                                                                                                                                |                                                                                                                                                           |
| 2668 | 0.040378 | -0.818 | 343.067029 | 344.074305 | -0.120136 | 1  | Ph | C14H16O10  | Theogallin                                                                                                                                                                                                                  |                                                                                                                                                                |                                                                                                                                                           |
| 2222 | 0.036017 | -0.753 | 325.113981 | 326.121258 | -0.120525 | 6  | Cb | C12H22O10  | $\alpha$ -L-Fucosyl-1,2- $\beta$ -D-<br>galactoside; Glycoprotein $\alpha$ -L-<br>fucosyl-(1,2)-D-galactose;<br>Glycolipid $\alpha$ -L-fucosyl-1,2- $\beta$ -D-<br>galactose; $\alpha$ -L-Fucosyl-(1->2)-D-<br>galactosyl-R | 2-O- $\alpha$ -L-Rhamnopyranosyl-D-<br>glucopyranose; Neohesperidose                                                                                           | Robinobiose                                                                                                                                               |
| 1219 | 0.024786 | -0.494 | 275.092466 | 276.099742 | -0.114667 | 5  | Ph | C15H16O5   | Lactucin                                                                                                                                                                                                                    | Vernolepin                                                                                                                                                     | Vernomenin                                                                                                                                                |
| 4380 | 0.034810 | -0.351 | 407.098363 | 408.105640 | -0.017139 | 1  | Ph | C19H20O10  | Khellol glucoside; Khelloside                                                                                                                                                                                               |                                                                                                                                                                |                                                                                                                                                           |
| 2127 | 0.023288 | -0.294 | 321.134320 | 322.141596 | -0.131584 | 2  | Ph | C17H22O6   | Tetraneurin A                                                                                                                                                                                                               | epi-Tulipinolide diepoxide                                                                                                                                     |                                                                                                                                                           |

**f) List of TOP 80 identified HS Ds vs NI (non-inoculated ascontrol) from the significant 538 m/z at time A** selected with T-test (FDR=0.01 and S0=1). Total: 128 annotated compounds (121-/7+): Total 128 functional category counts: Ph:52; Lp:9; Cb:14; Pp:0; AmS:1; Nu:1; NM:3. The most specific compounds selected with higher stringency (FDR=0.005 and S0=1) are indicated in bolded lines. TOPs 80 functional category counts: Ph:73; Lp:15; Cb:29; Pp:2; AmS:3; Nu:1; NM:5.

| ID   | T-test<br><i>p-value</i> | HS<br><i>Ds-NI</i> | <i>m/z</i> | Mass       | error<br>(ppm) | n  | Cat. | Formula    | Identifications                                                                                                      |                                                                        |                                                                                                                                                                      |
|------|--------------------------|--------------------|------------|------------|----------------|----|------|------------|----------------------------------------------------------------------------------------------------------------------|------------------------------------------------------------------------|----------------------------------------------------------------------------------------------------------------------------------------------------------------------|
| 4953 | 0.024454                 | +2.652             | 439.124589 | 440.131866 | 0.009877       | 2  | Ph   | C20H24O11  | Ginkgolide C; BN 52022                                                                                               | Ginkgolide C (see KEGG C07603) [C20 isoprenoids (diterpenes) [PR0104]] |                                                                                                                                                                      |
| 4380 | 0.038096                 | +2.449             | 407.098363 | 408.105640 | -0.017139      | 1  | Ph   | C19H20O10  | Khellol glucoside; Khelloside                                                                                        |                                                                        |                                                                                                                                                                      |
| 1219 | 0.030303                 | +2.380             | 275.092466 | 276.099742 | -0.114667      | 5  | Ph   | C15H16O5   | Lactucin                                                                                                             | Vernolepin                                                             | Vernomenin                                                                                                                                                           |
| 1788 | 0.027959                 | +2.052             | 307.118678 | 308.125954 | -0.110488      | 3  | Ph   | C16H20O6   | 14-Dihydroxycornestin; Cornexistin                                                                                   | Monocerin                                                              |                                                                                                                                                                      |
| 2467 | 0.001702                 | +2.033             | 335.040834 | 336.048111 | -0.990151      | 1  | Nu   | C11H15NO9P | Nicotinate D-ribonucleotide; β-Nicotinate D-ribonucleotide; Nicotinate ribonucleotide; Nicotinic acid ribonucleotide |                                                                        |                                                                                                                                                                      |
| 1918 | 0.058023                 | -2.620             | 313.147866 | 314.155142 | 0.528679       | 1  | NM   | C19H23ClN2 | Clomipramine                                                                                                         |                                                                        |                                                                                                                                                                      |
| 1677 | 0.071333                 | -2.589             | 303.050993 | 304.058270 | -0.108829      | 7  | Ph   | C15H12O7   | Taxifolin; Dihydroquercetin; (+)-Dihydroquercetin; (+)-Taxifolin; trans-Dihydroquercetin                             | Pentahydroxyflavanone; Dihydrotricetin                                 | cis-Dihydroquercetin                                                                                                                                                 |
| 5431 | 0.039450                 | -2.508             | 465.103882 | 466.111159 | 0.069908       | 6  | Ph   | C21H22O12  | Quercetin 7-O-glucoside                                                                                              | Plantagoside                                                           | 3,4,5,2',4',6'-Hexahydroxychalcone 2'-glucoside [Chalcones and dihydrochalcones [PK1212]]                                                                            |
| 1590 | 0.031800                 | -2.490             | 299.113594 | 300.120870 | -0.109047      | 1  | Cb   | C14H20O7   | Salidroside; p-Hydroxyphenethyl alcohol 1-O-β-D-glucoside; Tyrosol glucoside                                         |                                                                        |                                                                                                                                                                      |
| 2057 | 0.046867                 | -2.427             | 319.045905 | 320.053181 | -0.113324      | 3  | Ph   | C15H12O8   | Dihydromyricetin; Ampelopsin; (+)-Dihydromyricetin; (+)-Ampelopsin                                                   | 2,3-Dihydrogossypetin                                                  | Amaranol A; (+)- 2,4,6-Trihydroxy-2-[(3,4,5-trihydroxyphenyl)methyl]-3(2H)-benzofuranone [Aurone flavonoids [PK1213]]                                                |
| 478  | 0.006533                 | -2.395             | 245.081895 | 246.089171 | -0.153334      | 6  | Ph   | C14H14O4   | Columbianetin                                                                                                        | Decursinol                                                             | Marmesin; (+)-Marmesin                                                                                                                                               |
| 1409 | 0.065922                 | -2.383             | 289.071731 | 290.079007 | -0.106598      | 35 | Ph   | C15H14O6   | cis-3,4-Leucopelargonidin                                                                                            | Luteoforol; 3-Deoxy-leucocyanidin                                      | (+)-Catechin; D-Catechin; Cyanidanol; (2R-trans)-2-(3,4-dihydroxyphenyl)-3,4-dihydro-2H-1-Benzopyran-3,5,7-triol; (2R,3S)-Catechin; (2R,3S)-(+)-Catechin; Cianidanol |
| 5133 | 0.069413                 | -2.371             | 449.108952 | 450.116229 | 0.038519       | 25 | Ph   | C21H22O11  | Neoastilbin; (2S,3S)-Taxifolin 3-rhamnoside                                                                          | 2',3,4,4',6'-Peptahydroxychalcone 4'-O-glucoside; PHC 4'-O-glucoside   | Astilbin                                                                                                                                                             |
| 4847 | 0.088631                 | -2.358             | 433.114041 | 434.121318 | 0.048061       | 32 | Ph   | C21H22O10  | Naringenin 7-O-β-D-glucoside; Prunin                                                                                 | Phlorizin chalcone; Chalcone 2'-O-glucoside                            | 2',4,4',6'-Tetrahydroxychalcone 4'-O-glucoside; THC 4'-glucoside                                                                                                     |
| 1186 | 0.069386                 | -2.356             | 273.076829 | 274.084105 | -0.067655      | 26 | Ph   | C15H14O5   | Phloretin                                                                                                            | α-Pyrufuluran                                                          | β-Pyrufuluran                                                                                                                                                        |
| 5493 | 0.031666                 | -2.297             | 469.135176 | 470.142452 | 0.055729       | 1  | Ph   | C21H26O12  | Plumieride                                                                                                           |                                                                        |                                                                                                                                                                      |

|      |          |        |            |            |           |    |     |           |                                                                                                                   |                                                                                                                                                                                                                                                                                       |                                                                                 |
|------|----------|--------|------------|------------|-----------|----|-----|-----------|-------------------------------------------------------------------------------------------------------------------|---------------------------------------------------------------------------------------------------------------------------------------------------------------------------------------------------------------------------------------------------------------------------------------|---------------------------------------------------------------------------------|
| 2347 | 0.016412 | -2.288 | 330.119400 | 331.126676 | -0.122722 | 1  | AmS | C14H21NO8 | 5'-O-β-D-Glucosylpyridoxine                                                                                       |                                                                                                                                                                                                                                                                                       |                                                                                 |
| 2277 | 0.070602 | -2.285 | 327.163515 | 328.170791 | -0.119791 | 1  | Lp  | C17H28O4S | Steryl sulfate                                                                                                    |                                                                                                                                                                                                                                                                                       |                                                                                 |
| 1158 | 0.039929 | -2.272 | 271.061181 | 272.068458 | -0.058348 | 37 | Ph  | C15H12O5  | Naringenin; 4',5,7-Trihydroxyflavanone                                                                            | (6aS,11aS)-3,6a,9-Trihydroxypterocarpan; 3,6,9-Trihydroxypterocarpan; (-)-Glycinol                                                                                                                                                                                                    | Licodione                                                                       |
| 1346 | 0.05955  | -2.212 | 285.040436 | 286.047712 | -0.089823 | 34 | Ph  | C15H10O6  | Luteolin; 3',4',5,7-Tetrahydroxyflavone; 5,7,3',4'-Tetrahydroxyflavone                                            | Kaempferol; 3,4',5,7-Tetrahydroxyflavone; 4H-1-Benzopyran-4-one,3,5,7-trihydroxy-2-(4-hydroxyphenyl)-5,7,4'-Trihydroxyflavonol; C.I. 75640; Indigo yellow; Kaempferol; Kempferol; Nimbecetin; Pelargidenolon; Populnetin; Rhamnolutein; Rhamnolutin; Robigenin; Swartziol; Trifolitin | Aureusidin                                                                      |
| 7597 | 0.053253 | -2.207 | 623.161749 | 624.169025 | -0.015889 | 60 | Ph  | C28H32O16 | Tectorigenin 7-O-gentiobioside [Isoflavonoids [PK1205]]                                                           | Isorhamnetin 3-neohesperidoside [Flavones and Flavonols [PK1211]]                                                                                                                                                                                                                     | Narcissin [Flavones and Flavonols [PK1211]]                                     |
| 3049 | 0.030753 | -2.183 | 355.103413 | 356.110690 | -0.119119 | 3  | Ph  | C16H20O9  | Gentiopicrin; Gentiopicroside                                                                                     | 1-O-Feruloyl-β-D-glucose; 1-Feruloyl-D-glucose                                                                                                                                                                                                                                        | Gentiopicrin (see KEGG C09782) [C10 isoprenoids (monoterpenes) [PR0102]]        |
| 4887 | 0.064083 | -2.146 | 435.129686 | 436.136963 | 0.036110  | 16 | Ph  | C21H24O10 | Phlorizin; Phlorhizin; Phloridzin                                                                                 | Epiafzelechin 3-O-β-D-allopyranoside [Flavans, Flavanols and Leucoanthocyanidins [PK1202]]                                                                                                                                                                                            | Arthromerin B [Flavans, Flavanols and Leucoanthocyanidins [PK1202]]             |
| 1376 | 0.049557 | -2.130 | 287.056089 | 288.063365 | -0.079954 | 33 | Ph  | C15H12O6  | Dihydrokaempferol; Aromadendrin; (+)-Dihydrokaempferol; (+)-Aromadendrin                                          | Fustin; 2,3-Dihydrofisetin                                                                                                                                                                                                                                                            | Eriodictyol                                                                     |
| 5691 | 0.065446 | -2.127 | 481.098785 | 482.106061 | 0.042399  | 1  | Ph  | C21H22O13 | 3,4,2',3',4',6',α-Heptahydroxychalcone 2'-glucoside [Chalcones and dihydrochalcones [PK1212]]                     |                                                                                                                                                                                                                                                                                       |                                                                                 |
| 2893 | 0.055781 | -2.104 | 350.306446 | 351.313723 | -0.019531 | 1  | Lp  | C22H41NO2 | Anandamide (20:2, n-6); N-(11Z,14Z-eicosadienoyl)-ethanolamine [N-acyl ethanolamines (endocannabinoids) [FA0804]] |                                                                                                                                                                                                                                                                                       |                                                                                 |
| 4627 | 0.000164 | -2.091 | 421.114055 | 422.121331 | 0.081091  | 7  | Ph  | C20H22O10 | Catechin 7-O-β-D-xyloside                                                                                         | Plicatic acid                                                                                                                                                                                                                                                                         | Catechin 7-O-β-D-xyloside [Flavans, Flavanols and Leucoanthocyanidins [PK1202]] |
| 2745 | 0.004778 | -2.084 | 345.119057 | 346.126333 | -0.142585 | 4  | Lp  | C15H22O9  | Aucubin                                                                                                           | Deutzioside                                                                                                                                                                                                                                                                           | Aucubin (see KEGG C09771) [C10 isoprenoids (monoterpenes) [PR0102]]             |
| 3088 | 0.046723 | -2.079 | 357.061579 | 358.068856 | -0.032332 | 10 | Ph  | C18H14O8  | 5,3'-Dihydroxy-4',5'-dimethoxy-6,7-methylenedioxyisoflavone [Isoflavonoids [PK1205]]                              | Dalpalatin [Isoflavonoids [PK1205]]                                                                                                                                                                                                                                                   | Luteolin 7-lactate [Flavones and Flavonols [PK1211]]                            |

|      |          |        |            |            |           |    |    |           |                                                                                                                                                                                                                                                                        |                                                                                                                                                               |                                                                                          |
|------|----------|--------|------------|------------|-----------|----|----|-----------|------------------------------------------------------------------------------------------------------------------------------------------------------------------------------------------------------------------------------------------------------------------------|---------------------------------------------------------------------------------------------------------------------------------------------------------------|------------------------------------------------------------------------------------------|
| 5064 | 0.032395 | -2.048 | 445.190118 | 446.197394 | -0.100135 | 1  | Lp | C21H34O8S | Ptilosteroid A; 5 $\alpha$ -pregn-20-en-2 $\beta$ ,3 $\beta$ ,4 $\beta$ ,15 $\beta$ ,16 $\beta$ -pentol 2-sulfate [C21 steroids (gluco/mineralocorticoids, progestogens) and derivatives [ST0203]]                                                                     |                                                                                                                                                               |                                                                                          |
| 3153 | 0.075825 | -2.043 | 359.134719 | 360.141996 | -0.102120 | 2  | Ph | C16H24O9  | 7-Deoxyloganate                                                                                                                                                                                                                                                        | 8-Epideoxyloganic acid                                                                                                                                        |                                                                                          |
| 2579 | 0.067408 | -2.037 | 339.129643 | 340.136919 | -0.081507 | 1  | Cb | C13H24O10 | Methyl-2- $\alpha$ -L-fucopyranosyl- $\beta$ -D-galactoside                                                                                                                                                                                                            |                                                                                                                                                               |                                                                                          |
| 3154 | 0.025590 | -2.025 | 359.149987 | 360.157263 | -0.070751 | 11 | Ph | C20H24O6  | Antheridiogen-An                                                                                                                                                                                                                                                       | Triptolide                                                                                                                                                    | Euponin                                                                                  |
| 2111 | 0.002536 | -2.019 | 321.061550 | 322.068827 | -0.126928 | 3  | Ph | C15H14O8  | Leucodelphinidin                                                                                                                                                                                                                                                       | Elephantorrhizol [Flavans, Flavanols and Leucoanthocyanidins [PK1202]]                                                                                        | Galocatechin-4 $\beta$ -ol [Flavans, Flavanols and Leucoanthocyanidins [PK1202]]         |
| 3857 | 0.048409 | -1.998 | 385.113996 | 386.121273 | -0.063172 | 2  | Ph | C17H22O10 | 1-O-Sinapoyl- $\beta$ -D-glucose; 1-O-Sinapoyl $\beta$ -D-glucoside                                                                                                                                                                                                    | 4-O- $\beta$ -D-Glucosyl-sinapate                                                                                                                             |                                                                                          |
| 328  | 0.000022 | -1.992 | 227.071321 | 228.078597 | -0.205916 | 10 | Ph | C14H12O3  | 3,4',5-Trihydroxystilbene; Resveratrol                                                                                                                                                                                                                                 | Seselin                                                                                                                                                       | Trioxsalen; Trioxysalen; 4,8,5'-Trimethylpsoralen                                        |
| 1722 | 0.003721 | -1.980 | 305.066640 | 306.073916 | -0.120233 | 11 | Ph | C15H14O7  | Leucocyanidin; 2-(3,4-Dihydroxyphenyl)-3,4-dihydro-2H-1-benzopyran-3,4,5,7-tetrol; 3,3',4,4',5,7-Flavanhexol; 3,4-Cyanidiol; Leucoanthocyanidol; Leucocianidol; Leucocyanidol; Leukocyanidine; Procyanidol; Resivit; 2,3- <i>trans</i> -3,4- <i>cis</i> -Leucocyanidin | (+)-Galocatechin; Gallocatechol                                                                                                                               | (-)-Epigallocatechin                                                                     |
| 1255 | 0.000667 | -1.977 | 277.217271 | 278.224548 | -0.117541 | 62 | Lp | C18H30O2  | (6Z,9Z,12Z)-Octadecatrienoic acid; 6,9,12-Octadecatrienoic acid; $\gamma$ -Linolenic acid; Gamolenic acid                                                                                                                                                              | (9Z,12Z,15Z)-Octadecatrienoic acid; $\alpha$ -Linolenic acid; 9,12,15-Octadecatrienoic acid; Linolenate; $\alpha$ -Linolenate                                 | Crepenynate; (9Z)-Octadec-9-en-12-ynoate; (Z)-9-Octadecen-12-ynoic acid; Crepenynic acid |
| 5457 | 0.052513 | -1.967 | 467.098394 | 468.105671 | 0.051411  | 2  | Ph | C24H20O10 | Epigallocatechin 3-O-cafeate [Flavans, Flavanols and Leucoanthocyanidins [PK1202]]                                                                                                                                                                                     | Apocynin A [Flavans, Flavanols and Leucoanthocyanidins [PK1202]]                                                                                              |                                                                                          |
| 51   | 0.002089 | -1.967 | 173.009145 | 174.016422 | -0.092226 | 6  | Ph | C6H6O6    | <i>cis</i> -Aconitate; <i>cis</i> -Aconitic acid                                                                                                                                                                                                                       | <i>trans</i> -Aconitate; <i>trans</i> -Aconitic acid                                                                                                          | Dehydroascorbate; Dehydroascorbic acid; L-Dehydroascorbate; L-Dehydroascorbic acid       |
| 3101 | 0.051993 | -1.932 | 357.119069 | 358.126345 | -0.103262 | 3  | Cb | C16H22O9  | Tarennoside                                                                                                                                                                                                                                                            | 10-Deoxygeniposidic acid                                                                                                                                      | Sweroside                                                                                |
| 1247 | 0.071058 | -1.922 | 277.092868 | 278.100145 | -0.082506 | 5  | Ph | C11H18O8  | Tuliposide A                                                                                                                                                                                                                                                           | Isovalerylglucuronide (see KEGG C03033); (2S,3S,4S,5R,6S)-3,4,5-trihydroxy-6-(3-methylbutanoyloxy)oxane-2-carboxylic acid [secondary alcohol]                 |                                                                                          |
| 7603 | 0.048851 | -1.906 | 623.255794 | 624.263070 | 0.216834  | 1  | Cb | C27H44O16 | Kanokoside D                                                                                                                                                                                                                                                           | (9E)-Octadecenoic acid; 9-Octadecenoic acid, (E)-; (E)-Oleic acid; D9- <i>trans</i> -Octadecenoic acid; 9- <i>trans</i> -Octadecenoic acid; <i>trans</i> -D9- | (6Z)-Octadecenoic acid; Petroselinic acid; <i>cis</i> -6-Octadecenoic acid               |
| 1304 | 0.040718 | -1.898 | 281.248574 | 282.255850 | -0.106353 | 58 | Lp | C18H34O2  | (9Z)-Octadecenoic acid; (Z)-Octadec-9-enoic acid; Oleate; Oleic acid                                                                                                                                                                                                   |                                                                                                                                                               |                                                                                          |



|      |          |        |            |            |           |    |    |              |                                                                                                                                                                                                                          |                                                                                                                                |                                                                                                                                   |
|------|----------|--------|------------|------------|-----------|----|----|--------------|--------------------------------------------------------------------------------------------------------------------------------------------------------------------------------------------------------------------------|--------------------------------------------------------------------------------------------------------------------------------|-----------------------------------------------------------------------------------------------------------------------------------|
| 8583 | 0.004363 | -1.884 | 743.486985 | 744.494261 | 0.169877  | 18 | Lp | C40H73O10P   | PG(16:/18:3(6Z,9Z,12Z)); 1-hexadecanoyl-2-(6Z,9Z,12Z-octadecatrienoyl)-sn-glycero-3-phospho-(1'-sn-glycerol) [primary alcohol]                                                                                           | Octadecenoic acid; <i>trans</i> -9-Octadecenoic acid; <i>trans</i> -Elaidic acid; Acide elaidique; Elaidinsaure                |                                                                                                                                   |
| 4814 | 0.052664 | -1.857 | 431.155905 | 432.163181 | 0.044900  | 1  | Cb | C19H28O11    | Zizybeoside I                                                                                                                                                                                                            | PG(16:/18:3(9Z,12Z,15Z)); 1-hexadecanoyl-2-(9Z,12Z,15Z-octadetrienoil)-sn-glycero-3-phospho-(1'-sn-glycerol) [primary alcohol] | PG(16:1(9Z)/18:2(9Z,12Z)); 1-(9Z-hexadecenoyl)-2-(9Z,12Z-octadecadienoyl)-sn-glycero-3-phospho-(1'-sn-glycerol) [primary alcohol] |
| 5036 | 0.080100 | -1.831 | 443.192275 | 444.199552 | 0.009678  | 1  | Cb | C21H32O10    | dihydrophaseic acid 4-O-β-D-glucoside; (2Z,4E)-5-[(1R,3S,5R,8S)-3-(β-D-glucopyranosyloxy)-8-hydroxy-1,5-dimethyl-6-oxabicyclo[3.2.1]oct-8-yl]-3-methylpenta-2,4-dienoic acid [C15 isoprenoids (sesquiterpenes) [PR0103]] |                                                                                                                                |                                                                                                                                   |
| 4021 | 0.027272 | -1.828 | 391.124562 | 392.131838 | -0.059958 | 1  | Ph | C16H24O11    | Shanzhiside                                                                                                                                                                                                              |                                                                                                                                |                                                                                                                                   |
| 449  | 0.023042 | -1.808 | 243.066250 | 244.073527 | -0.131492 | 10 | Ph | C14H12O4     | 3,3',4'5-Tetrahydroxystilbene; Piceatannol                                                                                                                                                                               | Wyerone acid                                                                                                                   | Eriobofuran                                                                                                                       |
| 5171 | 0.056776 | -1.806 | 451.103475 | 452.110751 | 0.041592  | 6  | Ph | C24H20O9     | Cinchonain 1a                                                                                                                                                                                                            | 9,10-Dihydro-10-(3,4-dihydroxyphenyl)-pyrano[2,3-h]catechin-8-one [Flavans, Flavanols and Leucoanthocyanidins [PK1202]]        | Cinchonain Ib [Flavans, Flavanols and Leucoanthocyanidins [PK1202]]                                                               |
| 4027 | 0.047126 | -1.795 | 391.160971 | 392.168248 | 0.453424  | 1  | NM | C21H27ClN2O3 | Cl37 isotope of Compound II(R/S); 5-(7-(6-Chloro-4-(5-hydro-4-methyl-2-oxazolyl)phenoxy)heptyl)-3-methylisoxazole                                                                                                        |                                                                                                                                |                                                                                                                                   |
| 2219 | 0.012638 | -1.754 | 325.092849 | 326.100126 | -0.128228 | 8  | Ph | C15H18O8     | 4-O-β-D-Glucosyl-4-hydroxycinnamate                                                                                                                                                                                      | <i>trans</i> -β-D-Glucosyl-2-hydroxycinnamate; β-D-Glucosyl-2-coumarate                                                        | <i>cis</i> -β-D-Glucosyl-2-hydroxycinnamate; β-D-Glucosyl-2-coumarinate                                                           |
| 6042 | 0.001942 | -1.751 | 499.291301 | 500.298577 | 0.088261  | 1  | NM | C26H44O9     | Mupirocin                                                                                                                                                                                                                |                                                                                                                                |                                                                                                                                   |
| 4022 | 0.001195 | -1.742 | 391.128449 | 392.135726 | 0.030165  | 5  | Ph | C20H22O8     | O18 isotope of Piceid; Polydatin; 3,4,5-Trihydroxystilbene-3-β-monoglucoside                                                                                                                                             | O18 isotope of Populin                                                                                                         | O18 isotope of Apigeniflavan 5-O-xyloside [Flavans, Flavanols and Leucoanthocyanidins [PK1202]]                                   |
| 2179 | 0.049689 | -1.738 | 323.098329 | 324.105606 | -0.127735 | 2  | Cb | C12H20O10    | Bis-D-fructose 2',1:2,1'-dianhydride; Difructose anhydride I; Di-D-fructose 1,2'; 2,1' dianhydride                                                                                                                       | D-Fructofuranose 1,2':2,3'-dianhydride                                                                                         |                                                                                                                                   |
| 4636 | 0.050494 | -1.720 | 421.207924 | 422.215201 | 0.008100  | 1  | Cb | C19H34O10    | 1-Octen-3-ol-3-o-β-D-xylopyranosyl(1->6)-β-D-glucopyranoside                                                                                                                                                             |                                                                                                                                |                                                                                                                                   |
| 6367 | 0.048713 | -1.714 | 519.187226 | 520.194503 | 0.078545  | 2  | Ph | C26H32O11    | Brusatol                                                                                                                                                                                                                 | (-)-Pinoresinol glucoside                                                                                                      |                                                                                                                                   |
| 11   | 0.079341 | -1.706 | 161.045532 | 162.052809 | -0.091525 | 30 | Cb | C6H10O5      | Lichenin; Lichenan                                                                                                                                                                                                       | (R)-3,3-Dimethylmalate                                                                                                         | 3-Ethylmalate                                                                                                                     |

|      |          |        |            |            |           |    |    |            |                                                                                                                                                                                                                                                |                                                                                                                                                          |                                                                                                  |
|------|----------|--------|------------|------------|-----------|----|----|------------|------------------------------------------------------------------------------------------------------------------------------------------------------------------------------------------------------------------------------------------------|----------------------------------------------------------------------------------------------------------------------------------------------------------|--------------------------------------------------------------------------------------------------|
| 4393 | 0.077835 | -1.694 | 407.171139 | 408.178415 | -0.005805 | 2  | Ph | C21H28O8   | Vernoflexuoside                                                                                                                                                                                                                                |                                                                                                                                                          |                                                                                                  |
| 4594 | 0.003211 | -1.690 | 419.134784 | 420.142061 | 0.067492  | 10 | Ph | C21H24O9   | Melampodin A                                                                                                                                                                                                                                   | Glycyphyllin; Phloretin 2'-O-rhamnoside                                                                                                                  | Isorhapontin                                                                                     |
| 2276 | 0.028060 | -1.688 | 327.144911 | 328.152188 | -0.047159 | 3  | Ph | C16H24O7   | Rhododendrin                                                                                                                                                                                                                                   | Tetranor-PGEM; 11R-hydroxy-9,15-dioxo-2,3,4,5-tetranor-prostan-1,20-dioic acid [Prostaglandins [FA0301]]                                                 | Prostaglandin M; 7R-hydroxy-5,11-dioxotetranorprostane-1,16-dioic acid [Prostaglandins [FA0301]] |
| 4292 | 0.052111 | -1.672 | 403.139861 | 404.147137 | 0.048967  | 4  | Ph | C21H24O8   | Mallotophenone                                                                                                                                                                                                                                 | Koaburanin [Flavans, Flavanols and Leucoanthocyanidins [PK1202]]                                                                                         | Orientanol A [Pterocarpans [PK1207]]                                                             |
| 6989 | 0.000813 | -1.658 | 563.140743 | 564.148019 | 0.201658  | 52 | Ph | C26H28O14  | Apigenin 7-O-[β-D-apiosyl-(1->2)-β-D-glucoside]; 7-O-(β-D-Apiofuranosyl-1,2-β-D-glucosyl)-5,7,4'-trihydroxyflavone; Apiin; 7-[(2-O-D-Apio-β-D-furanosyl-β-D-glucopyranosyl)oxy]-5-hydroxy-2-(4-hydroxy-phenyl)-4H-1-benzopyran-4-one; Apioside | Neoschaftoside                                                                                                                                           | Schaftoside                                                                                      |
| 3591 | 0.049406 | -1.657 | 375.129648 | 376.136925 | -0.059642 | 3  | Ph | C16H24O10  | Loganate; Loganic acid                                                                                                                                                                                                                         | 7-Epiloganic acid                                                                                                                                        |                                                                                                  |
| 2539 | 0.038221 | -1.650 | 337.113983 | 338.121259 | 0.392818  | 1  | Ph | C12H20N2O9 | <i>O18 isotope of 3-Epihydroxymugineic acid</i>                                                                                                                                                                                                |                                                                                                                                                          |                                                                                                  |
| 3972 | 0.000701 | -1.622 | 389.181684 | 390.188961 | -0.055764 | 1  | Lp | C18H30O9   | (-)-11-hydroxy-9,10-dihydrojasmonic acid 11-β-D-glucoside; {(1R,2R)-2-[4-(β-D-glucopyranosyloxy)pentyl]-3-oxocyclopentyl}acetic acid [Jasmonic acids [FA0202]]                                                                                 |                                                                                                                                                          |                                                                                                  |
| 7153 | 0.006694 | -1.619 | 577.135234 | 578.142510 | 0.145859  | 12 | Ph | C30H26O12  | Epicatechin-(4β->8)-ent-epicatechin                                                                                                                                                                                                            | Procyanidin B4; Catechin-(4α->8)-epicatechin                                                                                                             | Procyanidin B2; Procyanidol B2                                                                   |
| 3967 | 0.00036  | -1.597 | 389.124168 | 390.131444 | -0.060382 | 5  | Ph | C20H22O8   | Piceid; Polydatin; 3,4,5-Trihydroxystilbene-3-β-monoglucoside                                                                                                                                                                                  | Populin                                                                                                                                                  | Apigeniflavan 5-O-xyloside [Flavans, Flavanols and Leucoanthocyanidins [PK1202]]                 |
| 1480 | 0.046372 | -1.569 | 293.030257 | 294.037533 | -0.115504 | 1  | Ph | C13H10O8   | Tricrozarin A                                                                                                                                                                                                                                  |                                                                                                                                                          |                                                                                                  |
| 1303 | 0.050254 | -1.544 | 281.139425 | 282.146702 | -0.078970 | 6  | Ph | C15H22O5   | Hymenoxon                                                                                                                                                                                                                                      | Qing Hau Sau; Artemisinin                                                                                                                                | Dihydrophaseic acid; (-)-Dihydrophaseic acid                                                     |
| 80   | 0.006086 | -1.538 | 179.056091 | 180.063368 | -0.114407 | 69 | Cb | C6H12O6    | D-Glucose; Grape sugar; Dextrose                                                                                                                                                                                                               | D-Fructose; Levulose; Fruit sugar; D-arabino-Hexulose                                                                                                    | D-Galactose                                                                                      |
| 1351 | 0.000212 | -1.532 | 285.097947 | 286.105223 | -0.104355 | 4  | Cb | C13H18O7   | Salicin; Salicoside                                                                                                                                                                                                                            | Gastrodin; 4-(Hydroxymethyl)phenyl-β-D-glucopyranoside                                                                                                   | Methylarbutin                                                                                    |
| 5778 | 7.93E-08 | -1.528 | 485.082492 | 486.089768 | 0.446498  | 1  | Cb | C20H20O14  | <i>O18 isotope of 1-O,6-O-Digalloyl-β-D-glucose</i>                                                                                                                                                                                            |                                                                                                                                                          |                                                                                                  |
| 3922 | 0.035977 | -1.497 | 387.166034 | 388.173310 | -0.057526 | 2  | Lp | C18H28O9   | Tuberonic acid glucoside                                                                                                                                                                                                                       | Tuberonic acid glucoside (see KEGG C08558); (1R,2S)-3-oxo-2-(5'-O-β-D-glucopyranosyloxy-2''Z-pentenyl)-cyclopentaneacetic acid [Fatty acyl glycosides of |                                                                                                  |

|      |          |        |            |            |           |    |    |           |                                                                      |                                   |                                                                     |
|------|----------|--------|------------|------------|-----------|----|----|-----------|----------------------------------------------------------------------|-----------------------------------|---------------------------------------------------------------------|
| 6824 | 0.011486 | -1.451 | 549.182543 | 550.189820 | 0.089857  | 1  | Ph | C23H34O15 | Genipin 1-β-gentiobioside                                            | mono- and disaccharides [FA1301]] |                                                                     |
| 6097 | 0.005081 | -1.407 | 503.161797 | 504.169074 | 0.077257  | 21 | Cb | C18H32O16 | Raffinose; Melitose; Melitriose; Gossypose; 6G-α-D-galactosylsucrose | Panose                            | Galactomannan; Galactomannoglycan                                   |
| 7699 | 0.011577 | -1.389 | 633.073451 | 634.080728 | 0.180016  | 1  | Ph | C27H22O18 | Corilagin                                                            |                                   |                                                                     |
| 1586 | 0.023494 | -1.363 | 299.077209 | 300.084485 | -0.108396 | 1  | Ph | C13H16O8  | 4-(β-D-Glucosyloxy)benzoate                                          |                                   |                                                                     |
| 4335 | 0.082859 | -1.358 | 405.119098 | 406.126375 | -0.018591 | 7  | Ph | C20H22O9  | Astringin                                                            | Trichocarpin                      | Anadanthoside [Flavans, Flavanols and Leucoanthocyanidins [PK1202]] |
| 5732 | 0.068787 | -1.325 | 483.078040 | 484.085316 | 0.022519  | 1  | Cb | C20H20O14 | 1-O,6-O-Digalloyl-β-D-glucose                                        |                                   |                                                                     |

**g) List of TOP 51 identified WSHS *Ds* vs NI (non-inoculated as control) from the significant 802 *m/z* at time A** selected with T-test (FDR=0.005 and S0=2). Total: 174 annotated compounds (173-/1+); Total 174 functional category counts: Ph:31; Lp:8; Cb:8; Pp:1; AmS:2; Nu:0; NM:1. The most specific compounds selected with higher stringency (FDR=0.001 and S0=2) are indicated in bolded lines. TOPs 51 functional category counts: Ph:91; Lp:26; Cb:37; Pp:6; AmS:4; Nu:0; NM:10.

| ID   | T-test<br><i>p-value</i> | WSHS<br><i>Ds</i> -NI | <i>m/z</i> | Mass       | error<br>(ppm) | n  | Cat. | Formula    | Identifications                                                                    |                                                                                                     |                                                                                                                                                                 |
|------|--------------------------|-----------------------|------------|------------|----------------|----|------|------------|------------------------------------------------------------------------------------|-----------------------------------------------------------------------------------------------------|-----------------------------------------------------------------------------------------------------------------------------------------------------------------|
| 5781 | 0.023383                 | -2.818                | 485.108961 | 486.116238 | 0.054370       | 2  | Ph   | C24H22O11  | Flavonol 3-O-(6-O-malonyl-β-D-glucoside)                                           | Epigallocatechin 3-O-(3,5-di-O-methylgallate) [Flavans, Flavanols and Leucoanthocyanidins [PK1202]] |                                                                                                                                                                 |
| 1087 | 0.116299                 | -2.766                | 265.144542 | 266.151818 | 0.677275       | 6  | Pp   | C14H20N2O3 | O18 isotope of Subaphyllin; Feruloylputrescine                                     | Mukaadial                                                                                           | Rugosal                                                                                                                                                         |
| 5566 | 0.021056                 | -2.662                | 473.363676 | 474.370953 | 0.090535       | 15 | Ph   | C30H50O4   | Sapelin A                                                                          | Bryodulcosigenin                                                                                    | Soyasapogenol A                                                                                                                                                 |
| 4717 | 0.000313                 | -2.655                | 425.087827 | 426.095103 | 0.049636       | 2  | Ph   | C22H18O9   | Epiafzelechin 3-O-gallate [Flavans, Flavanols and Leucoanthocyanidins [PK1202]]    | Epigallocatechin 3-O-(4-hydroxybenzoate) [Flavans, Flavanols and Leucoanthocyanidins [PK1202]]      |                                                                                                                                                                 |
| 1130 | 0.038652                 | -2.584                | 269.045564 | 270.052841 | 0.064429       | 42 | Ph   | C15H10O5   | Apigenin; 4',5,7-Trihydroxyflavone; 5,7,4'-Trihydroxyflavone                       | 2'-Hydroxydaidzein                                                                                  | Genistein; 5,7,4'-Trihydroxyisoflavone                                                                                                                          |
| 7699 | 0.068581                 | -2.575                | 633.073451 | 634.080728 | 0.180016       | 1  | Ph   | C27H22O18  | Corilagin                                                                          |                                                                                                     |                                                                                                                                                                 |
| 5278 | 0.081839                 | -2.563                | 457.077691 | 458.084967 | 0.122575       | 7  | Ph   | C22H18O11  | Epigallocatechin 3-gallate                                                         | 8-Demethyltetracenomycin C                                                                          | Epigallocatechin gallate (see KEGG C09731); [(2R,3R)-5,7-dihydroxy-2-(3,4,5-trihydroxyphenyl)chroman-3-yl] 3,4,5-trihydroxybenzoate [phenol or hydroxyhetarene] |
| 233  | 0.034641                 | -2.480                | 211.133944 | 212.141220 | -0.115861      | 15 | Lp   | C12H20O3   | Cucurbic acid                                                                      | Putaminoxin                                                                                         | Traumatins; (10E)-12-Oxododecenoic acid                                                                                                                         |
| 5457 | 0.036977                 | -2.465                | 467.098394 | 468.105671 | 0.051411       | 2  | Ph   | C24H20O10  | Epigallocatechin 3-O-cafeate [Flavans, Flavanols and Leucoanthocyanidins [PK1202]] | Apocynin A [Flavans, Flavanols and Leucoanthocyanidins [PK1202]]                                    |                                                                                                                                                                 |
| 3970 | 0.029056                 | -2.462                | 389.160552 | 390.167829 | -0.062778      | 2  | Ph   | C21H26O7   | Erioflorin acetate                                                                 |                                                                                                     |                                                                                                                                                                 |

|      |          |        |            |            |           |    |    |           |                                                                                                                   |                                                                                                                    |                                                                                                                                                              |
|------|----------|--------|------------|------------|-----------|----|----|-----------|-------------------------------------------------------------------------------------------------------------------|--------------------------------------------------------------------------------------------------------------------|--------------------------------------------------------------------------------------------------------------------------------------------------------------|
| 5778 | 0.056400 | -2.458 | 485.082492 | 486.089768 | 0.446498  | 1  | Cb | C20H20O14 | O18 isotope of 1-O,6-O-Digalloyl- $\beta$ -D-glucose                                                              |                                                                                                                    |                                                                                                                                                              |
| 132  | 0.116164 | -2.410 | 191.034952 | 192.042228 | -0.159394 | 10 | Ph | C10H8O4   | Scopoletin                                                                                                        | Naphthazarin; 5,8-Dihydroxy-1,4-naphthoquinone                                                                     | 3,4-Dehydro-6-hydroxymellein                                                                                                                                 |
| 3099 | 0.000109 | -2.369 | 357.107697 | 358.114974 | -0.013607 | 4  | Ph | C16H20O9  | O18 isotope of Gentiopicrin; Gentiopicroside                                                                      | O18 isotope of 1-O-Feruloyl- $\beta$ -D-glucose; 1-Feruloyl-D-glucose                                              | O18 isotope of Gentiopicrin (see KEGG C09782) [C10 isoprenoids (monoterpenes) [PR0102]]                                                                      |
| 3831 | 0.000344 | -2.353 | 384.145333 | 385.152609 | 0.187448  | 1  | Ph | C21H23NO6 | Polycarpine                                                                                                       |                                                                                                                    |                                                                                                                                                              |
| 6042 | 0.076656 | -2.337 | 499.291301 | 500.298577 | 0.088261  | 1  | NM | C26H44O9  | Mupirocin                                                                                                         |                                                                                                                    |                                                                                                                                                              |
| 1843 | 0.058426 | -2.335 | 310.093192 | 311.100468 | -0.108516 | 4  | Ph | C14H17NO7 | Taxiphyllin; (R)-4-Hydroxymandelonitrile $\beta$ -D-glucoside                                                     | Dhurrin; (S)-4-Hydroxymandelonitrile $\beta$ -D-glucoside                                                          | p-Glucosyloxymandelonitrile                                                                                                                                  |
| 4635 | 0.018222 | -2.320 | 421.186827 | 422.194104 | 0.084740  | 4  | Ph | C22H30O8  | Valtratum; Valtrate                                                                                               | Isovaltrate                                                                                                        | Picrasin F                                                                                                                                                   |
| 3088 | 0.022141 | -2.319 | 357.061579 | 358.068856 | -0.032332 | 10 | Ph | C18H14O8  | 5,3'-Dihydroxy-4',5'-dimethoxy-6,7-methylenedioxyisoflavone [Isoflavonoids [PK1205]]                              | Dalpalatin [Isoflavonoids [PK1205]]                                                                                | Luteolin 7-lactate [Flavones and Flavonols [PK1211]]                                                                                                         |
| 5262 | 0.023223 | -2.317 | 455.353108 | 456.360385 | 0.086530  | 20 | Ph | C30H48O3  | Betulinic acid                                                                                                    | $\alpha$ -Elemolic acid                                                                                            | Ursolic acid                                                                                                                                                 |
| 4511 | 0.029686 | -2.304 | 413.218120 | 414.225397 | 0.069673  | 3  | Lp | C21H34O8  | methyl 5-hydroperoxy-6,8,9,11-bisepidioxy-12,14-eicosadienoate [Hydroperoxy fatty acids [FA0104]]                 | methyl 9,11-epidioxy-12,15-dihydroperoxy-5,7,13-eicosatrienoate [Hydroxy/hydroperoxyeicosatrienoic acids [FA0305]] | methyl 6,8-epidioxy-5,15-dihydroperoxy-9,11,13-eicosatrienoate [Hydroxy/hydroperoxyeicosatrienoic acids [FA0305]]                                            |
| 4985 | 0.045130 | -2.295 | 441.082837 | 442.090114 | 0.264769  | 10 | Ph | C22H18O10 | Robinetinidol 3-O-gallate [Flavans, Flavanols and Leucoanthocyanidins [PK1202]]                                   | ent-Robinetinidol 3-O-gallate [Flavans, Flavanols and Leucoanthocyanidins [PK1202]]                                | Catechin 3-O-gallate [Flavans, Flavanols and Leucoanthocyanidins [PK1202]]                                                                                   |
| 2893 | 0.072813 | -2.258 | 350.306446 | 351.313723 | -0.019531 | 1  | Lp | C22H41NO2 | Anandamide (20:2, n-6); N-(11Z,14Z-eicosadienoyl)-ethanolamine [N-acyl ethanolamines (endocannabinoids) [FA0804]] |                                                                                                                    |                                                                                                                                                              |
| 3591 | 0.076360 | -2.248 | 375.129648 | 376.136925 | -0.059642 | 3  | Ph | C16H24O10 | Loganate; Loganic acid                                                                                            | 7-Epiloganic acid                                                                                                  |                                                                                                                                                              |
| 4688 | 0.013266 | -2.246 | 423.326893 | 424.334170 | 0.092124  | 4  | Lp | C29H44O2  | $\alpha$ -Tocotrienol                                                                                             | 4,4'-Methylenebis(2,6-di-tert-butylphenol)                                                                         | $\alpha$ -Tocotrienol (see KEGG C14153); (2R)-2,5,7,8-tetramethyl-2-[(3E,7E)-4,8,12-trimethyltrideca-3,7,11-trienyl]chroman-6-ol [phenol or hydroxyhetarene] |
| 4730 | 0.023538 | -2.237 | 425.181737 | 426.189014 | 0.073384  | 2  | Ph | C21H30O9  | Abscisic acid glucose ester; abscisic acid- $\beta$ -D-glucopyranosyl ester                                       | $\gamma$ -CEHC Glc; $\gamma$ -carboxyethyl-hydroxychroman $\beta$ -D-glucoside [Vitamin E [PR0202]]                |                                                                                                                                                              |
| 2684 | 0.022418 | -2.216 | 343.124543 | 344.131820 | -0.121434 | 4  | Cb | C12H24O11 | Melibiiitol; 6-O- $\alpha$ -D-Galactosyl-D-glucitol                                                               | Clusianose                                                                                                         | Maltitol; 4-[3,4,5-trihydroxy-6-(hydroxymethyl)oxan-2-yl]oxyhexane-1,2,3,5,6-pentol [acetal]                                                                 |
| 5171 | 0.006168 | -2.211 | 451.103475 | 452.110751 | 0.041592  | 6  | Ph | C24H20O9  | Cinchonain 1a                                                                                                     | 9,10-Dihydro-10-(3,4-dihydroxyphenyl)-pyrano[2,3-h]catechin-8-one [Flavans,                                        | Cinchonain Ib [Flavans, Flavanols and Leucoanthocyanidins [PK1202]]                                                                                          |

|             |                 |               |                   |                   |                  |          |            |                   |                                                                                               |                                                                                                                                                      |                                                                                                                                                                                                |
|-------------|-----------------|---------------|-------------------|-------------------|------------------|----------|------------|-------------------|-----------------------------------------------------------------------------------------------|------------------------------------------------------------------------------------------------------------------------------------------------------|------------------------------------------------------------------------------------------------------------------------------------------------------------------------------------------------|
| 4636        | 0.008933        | -2.209        | 421.207924        | 422.215201        | 0.008100         | 1        | Cb         | C19H34O10         | 1-Octen-3-ol-3-o-β-D-xylopyranosyl(1->6)-β-D-glucopyranoside                                  | Flavanols and Leucoanthocyanidins [PK1202]]                                                                                                          |                                                                                                                                                                                                |
| <b>306</b>  | <b>0.033012</b> | <b>-2.204</b> | <b>223.133928</b> | <b>224.141204</b> | <b>-0.180408</b> | <b>8</b> | <b>Ph</b>  | <b>C13H20O3</b>   | <b>Vomifoliol; (6S,9R)-6-hydroxy-3-oxo-α-ionol</b>                                            | <b>(+/-)-6-Hydroxy-3-oxo-α-ionol</b>                                                                                                                 | <b>Methyl jasmonate; (-)-Methyl jasmonate</b>                                                                                                                                                  |
| 928         | 0.084980        | -2.200        | 263.128852        | 264.136128        | -0.116493        | 33       | Ph         | C15H20O4          | Abscisate; Absciscic acid; (+)-Absciscic acid                                                 | Amaralin                                                                                                                                             | Artemisiifolin                                                                                                                                                                                 |
| 1583        | 0.055928        | -2.176        | 299.056112        | 300.063389        | 0.002400         | 77       | Ph         | C16H12O6          | 5,7,4'-Trihydroxy-3'-methoxyflavone; 3'-O-Methyluteolin; Chrysoeriol                          | 3-Methoxyapigenin; 3-O-Methylkaempferol                                                                                                              | Leptosidin                                                                                                                                                                                     |
| <b>6299</b> | <b>0.003170</b> | <b>-2.172</b> | <b>515.286219</b> | <b>516.293495</b> | <b>0.092665</b>  | <b>2</b> | <b>Lp</b>  | <b>C26H44O10</b>  | <b>L-Olivosyl-oleandolide</b>                                                                 | <b>L-Olivosyl-oleandolide (see KEGG C11991) [Macrolides and lactone polyketides [PK04]]</b>                                                          |                                                                                                                                                                                                |
| <b>1247</b> | <b>0.008038</b> | <b>-2.143</b> | <b>277.092868</b> | <b>278.100145</b> | <b>-0.082506</b> | <b>5</b> | <b>Ph</b>  | <b>C11H18O8</b>   | <b>Tuliposide A</b>                                                                           | <b>Isovalerylglucuronide (see KEGG C03033); (2S,3S,4S,5R,6S)-3,4,5-trihydroxy-6-(3-methylbutanoyloxy)oxane-2-carboxylic acid [secondary alcohol]</b> |                                                                                                                                                                                                |
| 2506        | 0.010083        | -2.134        | 336.129968        | 337.137244        | -0.110462        | 3        | AmS        | C13H23NO9         | Streptobiosamine                                                                              |                                                                                                                                                      |                                                                                                                                                                                                |
| 5460        | 0.026091        | -2.126        | 467.119547        | 468.126824        | 0.101485         | 3        | Ph         | C21H24O12         | Catechin-4-ol 3-O-β-D-galactopyranoside [Flavans, Flavanols and Leucoanthocyanidins [PK1202]] | Catechin-4-ol 3-O-β-D-glycopyranoside [Flavans, Flavanols and Leucoanthocyanidins [PK1202]]                                                          | Leucodelphinidin 3-O-α-L-rhamnopyranoside [Flavans, Flavanols and Leucoanthocyanidins [PK1202]]                                                                                                |
| 6097        | 0.002255        | -2.126        | 503.161797        | 504.169074        | 0.077257         | 21       | Cb         | C18H32O16         | Raffinose; Melitose; Melitriose; Gossypose; 6G-α-D-galactosylsucrose                          | Panose                                                                                                                                               | Galactomannan; Galactomannoglycan                                                                                                                                                              |
| <b>1303</b> | <b>0.013100</b> | <b>-2.121</b> | <b>281.139425</b> | <b>282.146702</b> | <b>-0.078970</b> | <b>6</b> | <b>Ph</b>  | <b>C15H22O5</b>   | <b>Hymenoxon</b>                                                                              | <b>Qing Hau Sau; Artemisinin</b>                                                                                                                     | <b>Dihydrophaseic acid; (-)-Dihydrophaseic acid</b>                                                                                                                                            |
| 3153        | 0.069033        | -2.095        | 359.134719        | 360.141996        | -0.102120        | 2        | Ph         | C16H24O9          | 7-Deoxyloganate                                                                               | 8-Epideoxyloganic acid                                                                                                                               |                                                                                                                                                                                                |
| 3540        | 0.038126        | -2.086        | 373.113993        | 374.121269        | -0.074217        | 4        | Ph         | C16H22O10         | Secologanate                                                                                  | Swertiamarin                                                                                                                                         | Geniposidic acid                                                                                                                                                                               |
| <b>4590</b> | <b>0.022306</b> | <b>-2.077</b> | <b>419.098382</b> | <b>420.105659</b> | <b>0.027948</b>  | <b>7</b> | <b>Ph</b>  | <b>C20H20O10</b>  | <b>5,3',5'-Trihydroxy-3,6,7,8,4'-pentamethoxyflavone [Flavones and Flavonols [PK1211]]</b>    | <b>5,7,4'-Trihydroxy-3,6,8,3',5'-pentamethoxyflavone [Flavones and Flavonols [PK1211]]</b>                                                           | <b>5,7,3'-Trihydroxy-3,6,8,4',5'-pentamethoxyflavone [Flavones and Flavonols [PK1211]]</b>                                                                                                     |
| <b>3355</b> | <b>0.001644</b> | <b>-2.075</b> | <b>366.140542</b> | <b>367.147819</b> | <b>-0.074144</b> | <b>3</b> | <b>AmS</b> | <b>C14H25NO10</b> | <b>N-Acetyl-6-O-L-fucosyl-D-glucosamine [aldehyde]</b>                                        | <b>2-Acetamido-2-deoxy-6-O-a-L-fucopyranosyl-D-glucose [aldehyde]</b>                                                                                | <b>3-O-fucopyranosyl-2-acetamido-2-deoxyglucopyranose; N-[(2R,3R,4R,5R)-4,5,6-trihydroxy-1-oxo-3-[(2R,3S,4R,5S,6S)-3,4,5-trihydroxy-6-methyl-oxan-2-yl]oxy-hexan-2-yl]acetamide [aldehyde]</b> |
| 5493        | 0.050417        | -2.050        | 469.135176        | 470.142452        | 0.055729         | 1        | Ph         | C21H26O12         | Plumieride                                                                                    |                                                                                                                                                      |                                                                                                                                                                                                |
| 80          | 0.028026        | -2.026        | 179.056091        | 180.063368        | -0.114407        | 69       | Cb         | C6H12O6           | D-Glucose; Grape sugar; Dextrose                                                              | D-Fructose; Levulose; Fruit sugar; D-arabino-Hexulose                                                                                                | D-Galactose                                                                                                                                                                                    |

|      |          |        |            |            |           |    |    |           |                                                                                                                                                                                                          |                                                                      |                                                                                                        |
|------|----------|--------|------------|------------|-----------|----|----|-----------|----------------------------------------------------------------------------------------------------------------------------------------------------------------------------------------------------------|----------------------------------------------------------------------|--------------------------------------------------------------------------------------------------------|
| 2222 | 0.013499 | -2.026 | 325.113981 | 326.121258 | -0.120525 | 6  | Cb | C12H22O10 | $\alpha$ -L-Fucosyl-1,2- $\beta$ -D-galactoside; Glycoprotein $\alpha$ -L-fucosyl-(1,2)-D-galactose; Glycolipid $\alpha$ -L-fucosyl-1,2- $\beta$ -D-galactose; $\alpha$ -L-Fucosyl-(1->2)-D-galactosyl-R | 2-O- $\alpha$ -L-Rhamnopyranosyl-D-glucopyranose; Neohesperidose     | Robinobiose                                                                                            |
| 4022 | 0.003224 | -2.017 | 391.128449 | 392.135726 | 0.030165  | 5  | Ph | C20H22O8  | <i>018 isotope of Piceid; Polydatin; 3,4,5-Trihydroxystilbene-3-<math>\beta</math>-monoglucoside</i>                                                                                                     | <i>018 isotope of Populin</i>                                        | <i>018 isotope of Apigeniflavan 5-O-xyloside [Flavans, Flavanols and Leucoanthocyanidins [PK1202]]</i> |
| 3544 | 0.008113 | -2.003 | 373.150383 | 374.157659 | -0.062393 | 4  | Ph | C17H26O9  | Deoxyloganin; 7-Deoxyloganin                                                                                                                                                                             | 8-Epideoxyloganin                                                    | Deoxyloganin (see KEGG C06071) [C10 isoprenoids (monoterpenes) [PR0102]]                               |
| 3927 | 0.049133 | -1.972 | 387.238811 | 388.246087 | -0.041617 | 1  | Lp | C20H36O7  | 5,6-Dihydroxyprostaglandin F1a (see KEGG C06475) [secondary alcohol]                                                                                                                                     |                                                                      |                                                                                                        |
| 2179 | 0.008813 | -1.911 | 323.098329 | 324.105606 | -0.127735 | 2  | Cb | C12H20O10 | Bis-D-fructose 2',1:2,1'-dianhydride; Difructose anhydride I; Di-D-fructose 1,2'; 2,1' dianhydride                                                                                                       | D-Fructofuranose 1,2':2,3'-dianhydride                               |                                                                                                        |
| 1864 | 0.088433 | -1.896 | 311.098334 | 312.105610 | -0.117249 | 6  | Cb | C11H20O10 | Vicianose; O- $\alpha$ -L-Arabinopyranosyl-(1-6)-D-glucopyranose                                                                                                                                         | Arabino-galactose                                                    | 6-O- $\beta$ -D-Xylopyranosyl-D-glucose; Primeverose                                                   |
| 3972 | 0.029020 | -1.878 | 389.181684 | 390.188961 | -0.055764 | 1  | Lp | C18H30O9  | (-)-11-hydroxy-9,10-dihydrojasmonic acid 11- $\beta$ -D-glucoside; {(1R,2R)-2-[4-( $\beta$ -D-glucopyranosyloxy)pentyl]-3-oxocyclopentyl}acetic acid [Jasmonic acids [FA0202]]                           |                                                                      |                                                                                                        |
| 170  | 0.004956 | -1.761 | 199.170322 | 200.177598 | -0.159280 | 13 | Lp | C12H24O2  | Dodecanoic acid; Dodecanoate; Dodecylcarboxylate; Lauric acid                                                                                                                                            | Dodecanoic acid (see KEGG C02679); Dodecanoic acid [carboxylic acid] | Lauric acid (see KEGG C02679); dodecanoic acid [Straight chain fatty acids [FA0101]]                   |

### TABLES of COMMON *Ds* and *Np* DOWN-ACCUMULATED COMPOUNDS

Table lists of common annotated down-accumulated significant *m/z* between fungus *Neofusicoccum parvum* and *Diplodia seriata* (*Np* or *Ds*) inoculated-vines and non-inoculated ones under abiotic stresses: none (NAS), water (WS), heat (HS) or both stresses (WSHS). Lists of down-accumulated significant *m/z* in inoculated vines were compared per stress at Time-points A or B. Each compound is identified with an ID number and level of down-regulation is expressed by the difference versus non-infected samples by Perseus software (Student T-test FDR < 0.05, S0=0). Measured *m/z* and calculated KEGG theoretical Mass and error (ppm) are indicated and the number of possible MassTrix identifications is indicated in the “n” column but only the first three ones are listed. Functional categories (Cat.) were determined according to KEGG annotations: Carbohydrates (Cb); Lipids (Lp); Phytochemicals (Ph); Peptides (Pp); Amino sugars (AmS); Nucleotides (Nu) and no match (NM). Down-accumulated (-) compounds are colored in red gradient. Identified isotopic compounds are indicated in italic characters.

**h) List of the 15 identified compounds from the 105 common significant *m/z* of no abiotic stress (NAS) samples at time B.** Functional category counts: Ph:10; Lp:1; Cb:2; Pp:0; AmS:1; Nu:1; NM:0.

| ID   | NAS<br><i>Ds</i> - NI | NAS<br><i>Np</i> - NI | Cat. | <i>m/z</i> | Mass       | error<br>(ppm) | Formula    | n | Identification                                                                                                                              |                            |                                                                     |
|------|-----------------------|-----------------------|------|------------|------------|----------------|------------|---|---------------------------------------------------------------------------------------------------------------------------------------------|----------------------------|---------------------------------------------------------------------|
| 7463 | -2.686                | -2.882                | Ph   | 609.188462 | 610.195738 | 0.997565       | C34H30N2O9 | 1 | Atalanine                                                                                                                                   |                            |                                                                     |
| 3591 | -2.367                | -1.771                | Ph   | 375.129648 | 376.136925 | -0.059642      | C16H24O10  | 3 | Loganate; Loganic acid                                                                                                                      | 7-Epiloganic acid          |                                                                     |
| 5540 | -2.302                | -2.815                | Ph   | 472.146076 | 473.153353 | 0.058057       | C20H27NO12 | 1 | Proteacin                                                                                                                                   |                            |                                                                     |
| 3851 | -2.301                | -1.480                | Ph   | 385.077611 | 386.084888 | -0.061436      | C16H18O11  | 1 | O-Feruloylgalactarate; O-Feruloylgalactaric acid; 2'-(E)-O-Feruloylgalactaric acid                                                          |                            |                                                                     |
| 2347 | -2.287                | -2.287                | AmS  | 330.119400 | 331.126676 | -0.122722      | C14H21NO8  | 1 | 5'-O-β-D-Glucosylpyridoxine                                                                                                                 |                            |                                                                     |
| 3153 | -2.279                | -2.118                | Ph   | 359.134719 | 360.141996 | -0.102120      | C16H24O9   | 2 | 7-Deoxyloganate                                                                                                                             | 8-Epideoxyloganic acid     |                                                                     |
| 1590 | -2.233                | -2.706                | Cb   | 299.113594 | 300.120870 | -0.109047      | C14H20O7   | 1 | Salidroside; p-Hydroxyphenethyl alcohol 1-O-β-D-glucoside; Tyrosol glucoside                                                                |                            |                                                                     |
| 2745 | -2.156                | -1.828                | Lp   | 345.119057 | 346.126333 | -0.142585      | C15H22O9   | 4 | Aucubin                                                                                                                                     | Deutzioside                | Aucubin (see KEGG C09771) [C10 isoprenoids (monoterpenes) [PR0102]] |
| 3775 | -1.871                | -1.846                | Nu   | 382.100408 | 383.107685 | -0.072174      | C14H17N5O8 | 1 | Succinyladenosine; (2S)-2-[[9-[(2S,3R,4S,5R)-3,4-dihydroxy-5-(hydroxymethyl)oxolan-2-yl]purin-6-yl]amino]butanedioic acid [primary alcohol] |                            |                                                                     |
| 1864 | -1.860                | -1.826                | Cb   | 311.098334 | 312.105610 | -0.117249      | C11H20O10  | 6 | Vicianose; O-α-L-Arabinopyranosyl-(1-6)-D-glucopyranose                                                                                     | Arabino-galactose          | 6-O-β-D-Xylopyranosyl-D-glucose; Primeverose                        |
| 1194 | -1.551                | -2.456                | Ph   | 274.056804 | 275.064080 | -0.131780      | C10H13NO8  | 1 | 3-β-D-Glucopyranuronosyloxy-5-methylisoxazole                                                                                               |                            |                                                                     |
| 3454 | -1.415                | -1.838                | Ph   | 369.082692 | 370.089969 | -0.075560      | C16H18O10  | 1 | Fraxin                                                                                                                                      |                            |                                                                     |
| 2668 | -0.818                | -1.101                | Ph   | 343.067029 | 344.074305 | -0.120136      | C14H16O10  | 1 | Theogallin                                                                                                                                  |                            |                                                                     |
| 1219 | -0.494                | -0.349                | Ph   | 275.092466 | 276.099742 | -0.114667      | C15H16O5   | 5 | Lactucin                                                                                                                                    | Vernolepin                 | Vernomenin                                                          |
| 2127 | -0.294                | -0.433                | Ph   | 321.134320 | 322.141596 | -0.131584      | C17H22O6   | 2 | Tetraneurin A                                                                                                                               | epi-Tulipinolide diepoxide |                                                                     |

**i) List of the 106 identified compounds from the 486 common significant *m/z* of HS stress samples at time A.** Structure category counts: Ph:56; Lp:13; Cb:28; Pp:2; AmS:3; Nu:0; NM:4

| ID   | HS<br><i>Ds</i> -NI | HS<br><i>Np</i> -NI | Cat. | <i>m/z</i> | Mass       | error<br>(ppm) | Formula    | n | Identification                                                                                   |                                        |                                                                                           |
|------|---------------------|---------------------|------|------------|------------|----------------|------------|---|--------------------------------------------------------------------------------------------------|----------------------------------------|-------------------------------------------------------------------------------------------|
| 1918 | -2.620              | -2.307              | NM   | 313.147866 | 314.155142 | 0.528679       | C19H23ClN2 | 1 | Clomipramine                                                                                     |                                        |                                                                                           |
| 1677 | -2.589              | -2.438              | Ph   | 303.050993 | 304.058270 | -0.108829      | C15H12O7   | 7 | Taxifolin; Dihydroquercetin; (+)-Dihydroquercetin; (+)-Taxifolin; <i>trans</i> -Dihydroquercetin | Pentahydroxyflavanone; Dihydrotricetin | <i>cis</i> -Dihydroquercetin                                                              |
| 5431 | -2.508              | -2.144              | Ph   | 465.103882 | 466.111159 | 0.069908       | C21H22O12  | 6 | Quercetin 7-O-glucoside                                                                          | Plantagoside                           | 3,4,5,2',4',6'-Hexahydroxychalcone 2'-glucoside [Chalcones and dihydrochalcones [PK1212]] |
| 1590 | -2.490              | -2.126              | Cb   | 299.113594 | 300.120870 | -0.109047      | C14H20O7   | 1 | Salidroside; p-Hydroxyphenethyl alcohol 1-O-β-D-glucoside; Tyrosol glucoside                     |                                        |                                                                                           |



|      |        |        |     |            |            |           |           |    |                                                                          |                                                                                                                                                                                                                                                                                       |                                                                                                                                                                               |
|------|--------|--------|-----|------------|------------|-----------|-----------|----|--------------------------------------------------------------------------|---------------------------------------------------------------------------------------------------------------------------------------------------------------------------------------------------------------------------------------------------------------------------------------|-------------------------------------------------------------------------------------------------------------------------------------------------------------------------------|
| 2057 | -2.427 | -1.793 | Ph  | 319.045905 | 320.053181 | -0.113324 | C15H12O8  | 3  | Dihydromyricetin; Ampelopsin; (+)-Dihydromyricetin; (+)-Ampelopsin       | 2,3-Dihydrogossypetin                                                                                                                                                                                                                                                                 | Amaranol A; (+)- 2,4,6-Trihydroxy-2-[(3,4,5-trihydroxyphenyl)methyl]-3(2H)-benzofuranone [Aurone flavonoids [PK1213]]                                                         |
| 1409 | -2.383 | -1.745 | Ph  | 289.071731 | 290.079007 | -0.106598 | C15H14O6  | 35 | cis-3,4-Leucopelargonidin                                                | Luteoforol; 3-Deoxyleucocyanidin                                                                                                                                                                                                                                                      | (+)-Catechin; D-Catechin; Cyanidanol; (2R- <i>trans</i> )-2-(3,4-dihydroxyphenyl)-3,4-dihydro-2H-1-Benzopyran-3,5,7-triol; (2R,3S)-Catechin; (2R,3S)-(+)-Catechin; Cianidanol |
| 5133 | -2.371 | -2.027 | Ph  | 449.108952 | 450.116229 | 0.038519  | C21H22O11 | 25 | Neoastilbin; (2S,3S)-Taxifolin 3-rhamnoside                              | 2',3,4,4',6'-Peptahydroxychalcone 4'-O-glucoside; PHC 4'-O-glucoside                                                                                                                                                                                                                  | Astilbin                                                                                                                                                                      |
| 4847 | -2.358 | -2.075 | Ph  | 433.114041 | 434.121318 | 0.048061  | C21H22O10 | 32 | Naringenin 7-O-β-D-glucoside; Prunin                                     | Phlorizin chalcone; Chalcone 2'-O-glucoside                                                                                                                                                                                                                                           | 2',4,4',6'-Tetrahydroxychalcone 4'-O-glucoside; THC 4'-glucoside                                                                                                              |
| 2347 | -2.288 | -2.354 | AmS | 330.119400 | 331.126676 | -0.122722 | C14H21NO8 | 1  | 5'-O-β-D-Glucosylpyridoxine                                              |                                                                                                                                                                                                                                                                                       |                                                                                                                                                                               |
| 2277 | -2.285 | -2.081 | Lp  | 327.163515 | 328.170791 | -0.119791 | C17H28O4S | 1  | Steryl sulfate                                                           |                                                                                                                                                                                                                                                                                       |                                                                                                                                                                               |
| 1158 | -2.272 | -2.272 | Ph  | 271.061181 | 272.068458 | -0.058348 | C15H12O5  | 37 | Naringenin; 4',5,7-Trihydroxyflavanone                                   | (6aS,11aS)-3,6a,9-Trihydroxypterocarpan; 3,6,9-Trihydroxypterocarpan; (-)-Glycinol                                                                                                                                                                                                    | Licodione                                                                                                                                                                     |
| 1346 | -2.212 | -2.212 | Ph  | 285.040436 | 286.047712 | -0.089823 | C15H10O6  | 34 | Luteolin; 3',4',5,7-Tetrahydroxyflavone; 5,7,3',4'-Tetrahydroxyflavone   | Kaempferol; 3,4',5,7-Tetrahydroxyflavone; 4H-1-Benzopyran-4-one,3,5,7-trihydroxy-2-(4-hydroxyphenyl)-5,7,4'-Trihydroxyflavonol; C,I, 75640; Indigo yellow; Kaempferol; Kempferol; Nimbecetin; Pelargidenolon; Populnetin; Rhamnolutein; Rhamnolutin; Robigenin; Swartziol; Trifolitin | Aureusidin                                                                                                                                                                    |
| 7597 | -2.207 | -2.207 | Ph  | 623.161749 | 624.169025 | -0.015889 | C28H32O16 | 60 | Tectorigenin 7-O-gentiobioside [Isoflavonoids [PK1205]]                  | Isorhamnetin 3-neohesperidoside [Flavones and Flavonols [PK1211]]                                                                                                                                                                                                                     | Narcissin [Flavones and Flavonols [PK1211]]                                                                                                                                   |
| 3049 | -2.183 | -2.081 | Ph  | 355.103413 | 356.110690 | -0.119119 | C16H20O9  | 3  | Gentiopicrin; Gentiopicroside                                            | 1-O-Feruloyl-β-D-glucose; 1-Feruloyl-D-glucose                                                                                                                                                                                                                                        | Gentiopicrin (see KEGG C09782) [C10 isoprenoids (monoterpenes) [PR0102]]                                                                                                      |
| 4887 | -2.146 | -2.028 | Ph  | 435.129686 | 436.136963 | 0.036110  | C21H24O10 | 16 | Phlorizin; Phlorhizin; Phloridzin                                        | Epiafzelechin 3-O-β-D-allopyranoside [Flavans, Flavanols and Leucoanthocyanidins [PK1202]]                                                                                                                                                                                            | Arthromerin B [Flavans, Flavanols and Leucoanthocyanidins [PK1202]]                                                                                                           |
| 1376 | -2.130 | -1.998 | Ph  | 287.056089 | 288.063365 | -0.079954 | C15H12O6  | 33 | Dihydrokaempferol; Aromadendrin; (+)-Dihydrokaempferol; (+)-Aromadendrin | Fustin; 2,3-Dihydrofisetin                                                                                                                                                                                                                                                            | Eriodictyol                                                                                                                                                                   |
| 5691 | -2.127 | -1.739 | Ph  | 481.098785 | 482.106061 | 0.042399  | C21H22O13 | 1  | 3,4,2',3',4',6',α-Heptahydroxychalcone 2'-                               |                                                                                                                                                                                                                                                                                       |                                                                                                                                                                               |

|      |        |        |    |            |            |           |           |    |                                                                                                                                                                          |                                                                                                                                               |                                                                                          |
|------|--------|--------|----|------------|------------|-----------|-----------|----|--------------------------------------------------------------------------------------------------------------------------------------------------------------------------|-----------------------------------------------------------------------------------------------------------------------------------------------|------------------------------------------------------------------------------------------|
| 2893 | -2.104 | -2.104 | Lp | 350.306446 | 351.313723 | -0.019531 | C22H41NO2 | 1  | glucoside [Chalcones and dihydrochalcones [PK1212]]<br>Anandamide (20:2, n-6); N-(11Z,14Z-eicosadienoyl)-ethanolamine [N-acyl ethanolamines (endocannabinoids) [FA0804]] |                                                                                                                                               |                                                                                          |
| 4627 | -2.091 | -2.091 | Ph | 421.114055 | 422.121331 | 0.081091  | C20H22O10 | 7  | Catechin 7-O-β-D-xyloside                                                                                                                                                | Plicatic acid                                                                                                                                 | Catechin 7-O-β-D-xyloside [Flavans, Flavanols and Leucoanthocyanidins [PK1202]]          |
| 2745 | -2.084 | -1.822 | Lp | 345.119057 | 346.126333 | -0.142585 | C15H22O9  | 4  | Aucubin                                                                                                                                                                  | Deutzioside                                                                                                                                   | Aucubin (see KEGG C09771) [C10 isoprenoids (monoterpenes) [PR0102]]                      |
| 3088 | -2.079 | -2.079 | Ph | 357.061579 | 358.068856 | -0.032332 | C18H14O8  | 10 | 5,3'-Dihydroxy-4',5'-dimethoxy-6,7-methylenedioxyisoflavone [Isoflavonoids [PK1205]]                                                                                     | Dalpalatin [Isoflavonoids [PK1205]]                                                                                                           | Luteolin 7-lactate [Flavones and Flavanols [PK1211]]                                     |
| 5064 | -2.048 | -2.048 | Lp | 445.190118 | 446.197394 | -0.100135 | C21H34O8S | 1  | Ptilosteroid A; 5α-pregn-20-en-2β,3β,4β,15β,16β-pentol 2-sulfate [C21 steroids (gluco/mineralocorticoids, progestogens) and derivatives [ST0203]]                        |                                                                                                                                               |                                                                                          |
| 3153 | -2.043 | -2.052 | Ph | 359.134719 | 360.141996 | -0.102120 | C16H24O9  | 2  | 7-Deoxyloganate                                                                                                                                                          | 8-Epideoxyloganic acid                                                                                                                        |                                                                                          |
| 2579 | -2.037 | -2.455 | Cb | 339.129643 | 340.136919 | -0.081507 | C13H24O10 | 1  | Methyl-2-α-L-fucopyranosyl-β-D-galactoside                                                                                                                               |                                                                                                                                               |                                                                                          |
| 3154 | -2.025 | -1.682 | Ph | 359.149987 | 360.157263 | -0.070751 | C20H24O6  | 11 | Antheridiogen-An                                                                                                                                                         | Triptolide                                                                                                                                    | Euponin                                                                                  |
| 3857 | -1.998 | -1.469 | Ph | 385.113996 | 386.121273 | -0.063172 | C17H22O10 | 2  | 1-O-Sinapoyl-β-D-glucose; 1-O-Sinapoyl β-D-glucoside                                                                                                                     | 4-O-β-D-Glucosyl-sinapate                                                                                                                     |                                                                                          |
| 328  | -1.992 | -1.482 | Ph | 227.071321 | 228.078597 | -0.205916 | C14H12O3  | 10 | 3,4',5'-Trihydroxystilbene; Resveratrol                                                                                                                                  | Seselin                                                                                                                                       | Trioxsalen; Trioxysalen; 4,8,5'-Trimethylpsoralen                                        |
| 1255 | -1.977 | -2.051 | Lp | 277.217271 | 278.224548 | -0.117541 | C18H30O2  | 62 | (6Z,9Z,12Z)-Octadecatrienoic acid; 6,9,12-Octadecatrienoic acid; γ-Linolenic acid; Gamolenic acid                                                                        | (9Z,12Z,15Z)-Octadecatrienoic acid; α-Linolenic acid; 9,12,15-Octadecatrienoic acid; Linolenate; α-Linolenate                                 | Crepenynate; (9Z)-Octadec-9-en-12-ynoate; (Z)-9-Octadecen-12-ynoic acid; Crepenynic acid |
| 5457 | -1.967 | -1.760 | Ph | 467.098394 | 468.105671 | 0.051411  | C24H20O10 | 2  | Epigallocatechin 3-O-cafeate [Flavans, Flavanols and Leucoanthocyanidins [PK1202]]                                                                                       | Apocynin A [Flavans, Flavanols and Leucoanthocyanidins [PK1202]]                                                                              |                                                                                          |
| 51   | -1.967 | -2.107 | Ph | 173.009145 | 174.016422 | -0.092226 | C6H6O6    | 6  | cis-Aconitate; cis-Aconitic acid                                                                                                                                         | trans-Aconitate; trans-Aconitic acid                                                                                                          | Dehydroascorbate; Dehydroascorbic acid; L-Dehydroascorbate; L-Dehydroascorbic acid       |
| 3101 | -1.932 | -1.938 | Cb | 357.119069 | 358.126345 | -0.103262 | C16H22O9  | 3  | Tarennoside                                                                                                                                                              | 10-Deoxygeniposidic acid                                                                                                                      | Sweroside                                                                                |
| 1247 | -1.922 | -1.922 | Ph | 277.092868 | 278.100145 | -0.082506 | C11H18O8  | 5  | Tuliposide A                                                                                                                                                             | Isovalerylglucuronide (see KEGG C03033); (2S,3S,4S,5R,6S)-3,4,5-trihydroxy-6-(3-methylbutanoyloxy)oxane-2-carboxylic acid [secondary alcohol] |                                                                                          |
| 7603 | -1.906 | -1.906 | Cb | 623.255794 | 624.263070 | 0.216834  | C27H44O16 | 1  | Kanokoside D                                                                                                                                                             |                                                                                                                                               |                                                                                          |

|      |        |        |    |            |            |           |              |    |                                                                                                                                                                                                                          |                                                                                                                                                                                                                                                                                                                       |                                                                                                                                   |
|------|--------|--------|----|------------|------------|-----------|--------------|----|--------------------------------------------------------------------------------------------------------------------------------------------------------------------------------------------------------------------------|-----------------------------------------------------------------------------------------------------------------------------------------------------------------------------------------------------------------------------------------------------------------------------------------------------------------------|-----------------------------------------------------------------------------------------------------------------------------------|
| 1304 | -1.898 | -2.205 | Lp | 281.248574 | 282.255850 | -0.106353 | C18H34O2     | 58 | (9Z)-Octadecenoic acid; (Z)-Octadec-9-enoic acid; Oleate; Oleic acid                                                                                                                                                     | (9E)-Octadecenoic acid; 9-Octadecenoic acid, (E)-; (E)-Oleic acid; D9- <i>trans</i> -Octadecenoic acid; 9- <i>trans</i> -Octadecenoic acid; <i>trans</i> -D9-Octadecenoic acid; <i>trans</i> -9-Octadecenoic acid; <i>trans</i> -Elaidic acid; <i>trans</i> -Oleic acid; Elaidic acid; Acide elaidique; Elaidinsauure | (6Z)-Octadecenoic acid; Petroselinic acid; <i>cis</i> -6-Octadecenoic acid                                                        |
| 8583 | -1.884 | -1.348 | Lp | 743.486985 | 744.494261 | 0.169877  | C40H73O10P   | 18 | PG(16:0/18:3(6Z,9Z,12Z)); 1-hexadecanoyl-2-(6Z,9Z,12Z-octadecatrienoyl)-sn-glycero-3-phospho-(1'-sn-glycerol) [primary alcohol]                                                                                          | PG(16:0/18:3(9Z,12Z,15Z)); 1-hexadecanoyl-2-(9Z,12Z,15Z-octadecatrienoyl)-sn-glycero-3-phospho-(1'-sn-glycerol) [primary alcohol]                                                                                                                                                                                     | PG(16:1(9Z)/18:2(9Z,12Z)); 1-(9Z-hexadecenoyl)-2-(9Z,12Z-octadecadienoyl)-sn-glycero-3-phospho-(1'-sn-glycerol) [primary alcohol] |
| 4814 | -1.857 | -2.258 | Cb | 431.155905 | 432.163181 | 0.044900  | C19H28O11    | 1  | Zizybeoside I                                                                                                                                                                                                            |                                                                                                                                                                                                                                                                                                                       |                                                                                                                                   |
| 5036 | -1.831 | -2.007 | Cb | 443.192275 | 444.199552 | 0.009678  | C21H32O10    | 1  | dihydrophaseic acid 4-O-β-D-glucoside; (2Z,4E)-5-[(1R,3S,5R,8S)-3-(β-D-glucopyranosyloxy)-8-hydroxy-1,5-dimethyl-6-oxabicyclo[3,2,1]oct-8-yl]-3-methylpenta-2,4-dienoic acid [C15 isoprenoids (sesquiterpenes) [PR0103]] |                                                                                                                                                                                                                                                                                                                       |                                                                                                                                   |
| 4021 | -1.828 | -1.828 | Ph | 391.124562 | 392.131838 | -0.059958 | C16H24O11    | 1  | Shanzhiside                                                                                                                                                                                                              |                                                                                                                                                                                                                                                                                                                       |                                                                                                                                   |
| 449  | -1.808 | -1.808 | Ph | 243.066250 | 244.073527 | -0.131492 | C14H12O4     | 10 | 3,3',4'5-Tetrahydroxystilbene; Piceatannol                                                                                                                                                                               | Wyerone acid                                                                                                                                                                                                                                                                                                          | Eriobofuran                                                                                                                       |
| 5171 | -1.806 | -1.648 | Ph | 451.103475 | 452.110751 | 0.041592  | C24H20O9     | 6  | Cinchonain 1a                                                                                                                                                                                                            | 9,10-Dihydro-10-(3,4-dihydroxyphenyl)-pyrano[2,3-h]catechin-8-one [Flavans, Flavanols and Leucoanthocyanidins [PK1202]]                                                                                                                                                                                               | Cinchonain Ib [Flavans, Flavanols and Leucoanthocyanidins [PK1202]]                                                               |
| 4599 | -1.804 | -1.804 | Ph | 419.171164 | 420.178440 | 0.053946  | C22H28O8     | 6  | Eupacunolin                                                                                                                                                                                                              | Eupacunoxin                                                                                                                                                                                                                                                                                                           | Eupaformosanin                                                                                                                    |
| 4027 | -1.795 | -2.088 | NM | 391.160971 | 392.168248 | 0.453424  | C21H27ClN2O3 | 1  | <i>Cl37 isotope of Compound II(R/S); 5-(7-(6-Chloro-4-(5-hydro-4-methyl-2-oxazolyl)phenoxy)heptyl)-3-methylisoxazole</i>                                                                                                 |                                                                                                                                                                                                                                                                                                                       |                                                                                                                                   |
| 6042 | -1.751 | -1.751 | NM | 499.291301 | 500.298577 | 0.088261  | C26H44O9     | 1  | Mupirocin                                                                                                                                                                                                                |                                                                                                                                                                                                                                                                                                                       |                                                                                                                                   |
| 4022 | -1.742 | -1.742 | Ph | 391.128449 | 392.135726 | 0.030165  | C20H22O8     | 5  | <i>O18 isotope of Piceid; Polydatin; 3,4,5-Trihydroxystilbene-3-β-monoglucoside</i>                                                                                                                                      | <i>O18 isotope of Populin</i>                                                                                                                                                                                                                                                                                         | <i>O18 isotope of Apigeniflavan 5-O-xyloside [Flavans, Flavanols and Leucoanthocyanidins [PK1202]]</i>                            |
| 2179 | -1.738 | -1.506 | Cb | 323.098329 | 324.105606 | -0.127735 | C12H20O10    | 2  | Bis-D-fructose 2',1:2,1'-dianhydride; Difructose anhydride I; Di-D-fructose 1,2'; 2,1' dianhydride                                                                                                                       | D-Fructofuranose 1,2':2,3'-dianhydride                                                                                                                                                                                                                                                                                |                                                                                                                                   |

|      |        |        |     |            |            |           |              |    |                                                                                                                                                                                                                                                |                                                                                                                                         |                                                                                                  |
|------|--------|--------|-----|------------|------------|-----------|--------------|----|------------------------------------------------------------------------------------------------------------------------------------------------------------------------------------------------------------------------------------------------|-----------------------------------------------------------------------------------------------------------------------------------------|--------------------------------------------------------------------------------------------------|
| 4636 | -1.720 | -1.525 | Cb  | 421.207924 | 422.215201 | 0.008100  | C19H34O10    | 1  | 1-Octen-3-ol-3-o-β-D-xylopyranosyl(1->6)-β-D-glucopyranoside                                                                                                                                                                                   |                                                                                                                                         |                                                                                                  |
| 6367 | -1.714 | -1.879 | Ph  | 519.187226 | 520.194503 | 0.078545  | C26H32O11    | 2  | Brusatol                                                                                                                                                                                                                                       | (-)-Pinoresinol glucoside                                                                                                               |                                                                                                  |
| 3918 | -1.713 | -2.081 | Cb  | 387.129645 | 388.136921 | -0.066108 | C17H24O10    | 5  | Secologanin; (-)-Secologanin                                                                                                                                                                                                                   | Geniposide                                                                                                                              | Verbenalin; Cornin (glycoside)                                                                   |
| 3969 | -1.713 | -1.783 | NM  | 389.145306 | 390.152582 | 0.415595  | C21H25ClN2O3 | 4  | Cl37 isotope of Cetirizine                                                                                                                                                                                                                     | Cl37 isotope of Cetirizine (see KEGG C07778); 2-[2-[4-[(4-chlorophenyl)-phenyl-methyl]piperazin-1-yl]ethoxy]acetic acid [dialkyl ether] | Loganin                                                                                          |
| 11   | -1.706 | -2.180 | Cb  | 161.045532 | 162.052809 | -0.091525 | C6H10O5      | 30 | Lichenin; Lichenan                                                                                                                                                                                                                             | (R)-3,3-Dimethylmalate                                                                                                                  | 3-Ethylmalate                                                                                    |
| 1843 | -1.705 | -1.839 | Ph  | 310.093192 | 311.100468 | -0.108516 | C14H17NO7    | 4  | Taxiphyllin; (R)-4-Hydroxymandelonitrile β-D-glucoside                                                                                                                                                                                         | Dhurrin; (S)-4-Hydroxymandelonitrile β-D-glucoside                                                                                      | p-Glucosyloxymandelonitrile                                                                      |
| 2811 | -1.696 | -1.429 | Cb  | 347.171101 | 348.178377 | -0.116791 | C16H28O8     | 1  | Schizonepetoside E                                                                                                                                                                                                                             |                                                                                                                                         |                                                                                                  |
| 4393 | -1.694 | -1.526 | Ph  | 407.171139 | 408.178415 | -0.005805 | C21H28O8     | 2  | Vernoflexuoside                                                                                                                                                                                                                                |                                                                                                                                         |                                                                                                  |
| 4594 | -1.690 | -1.690 | Ph  | 419.134784 | 420.142061 | 0.067492  | C21H24O9     | 10 | Melampodin A                                                                                                                                                                                                                                   | Glycyphyllin; Phloretin 2'-O-rhamnoside                                                                                                 | Isorhapontin                                                                                     |
| 2276 | -1.688 | -1.688 | Ph  | 327.144911 | 328.152188 | -0.047159 | C16H24O7     | 3  | Rhododendrin                                                                                                                                                                                                                                   | Tetranor-PGEM; 11R-hydroxy-9,15-dioxo-2,3,4,5-tetranor-prostan-1,20-dioic acid [Prostaglandins [FA0301]]                                | Prostaglandin M; 7R-hydroxy-5,11-dioxotetranorprostane-1,16-dioic acid [Prostaglandins [FA0301]] |
| 4985 | -1.682 | -1.799 | Ph  | 441.082837 | 442.090114 | 0.264769  | C22H18O10    | 10 | Robinetinidol 3-O-gallate [Flavans, Flavanols and Leucoanthocyanidins [PK1202]]                                                                                                                                                                | ent-Robinetinidol 3-O-gallate [Flavans, Flavanols and Leucoanthocyanidins [PK1202]]                                                     | Catechin 3-O-gallate [Flavans, Flavanols and Leucoanthocyanidins [PK1202]]                       |
| 4292 | -1.672 | -1.672 | Ph  | 403.139861 | 404.147137 | 0.048967  | C21H24O8     | 4  | Mallotophenone                                                                                                                                                                                                                                 | Koaburanin [Flavans, Flavanols and Leucoanthocyanidins [PK1202]]                                                                        | Orientanol A [Pterocarpan [PK1207]]                                                              |
| 4338 | -1.666 | -1.699 | Ph  | 405.140233 | 406.147509 | -0.005430 | C17H26O11    | 4  | Ipolamiide                                                                                                                                                                                                                                     | 10-Hydroxyloganin                                                                                                                       | Morroniside                                                                                      |
| 6989 | -1.658 | -1.658 | Ph  | 563.140743 | 564.148019 | 0.201658  | C26H28O14    | 52 | Apigenin 7-O-[β-D-apiosyl-(1->2)-β-D-glucoside]; 7-O-(β-D-Apiofuranosyl-1,2-β-D-glucosyl)-5,7,4'-trihydroxyflavone; Apiin; 7-[(2-O-D-Apio-β-D-furanosyl-β-D-glucopyranosyl)oxy]-5-hydroxy-2-(4-hydroxy-phenyl)-4H-1-benzopyran-4-one; Apioside | Neoschaftoside                                                                                                                          | Schaftoside                                                                                      |
| 3591 | -1.657 | -1.724 | Ph  | 375.129648 | 376.136925 | -0.059642 | C16H24O10    | 3  | Loganate; Loganic acid                                                                                                                                                                                                                         | 7-Epiloganic acid                                                                                                                       |                                                                                                  |
| 3500 | -1.657 | -1.646 | Ph  | 371.134722 | 372.141998 | -0.092343 | C17H24O9     | 1  | Syringin; Eleutheroside B                                                                                                                                                                                                                      |                                                                                                                                         |                                                                                                  |
| 3072 | -1.653 | -1.633 | AmS | 356.098668 | 357.105944 | -0.103781 | C15H19NO9    | 1  | cyclo-Dopa 5-O-glucoside                                                                                                                                                                                                                       |                                                                                                                                         |                                                                                                  |
| 2539 | -1.650 | -1.757 | Ph  | 337.113983 | 338.121259 | 0.392818  | C12H20N2O9   | 1  | O18 isotope of 3-Epihydroxymugineic acid                                                                                                                                                                                                       |                                                                                                                                         |                                                                                                  |
| 4597 | -1.648 | -1.696 | Ph  | 419.155889 | 420.163166 | 0.009385  | C18H28O11    | 2  | Lamioside                                                                                                                                                                                                                                      | Lamioside (see KEGG C11645) [C10 isoprenoids (monoterpenes) [PR0102]]                                                                   |                                                                                                  |
| 3972 | -1.622 | -1.830 | Lp  | 389.181684 | 390.188961 | -0.055764 | C18H30O9     | 1  | (-)-11-hydroxy-9,10-dihydrojasmonic acid 11-β-D-                                                                                                                                                                                               |                                                                                                                                         |                                                                                                  |

|      |        |        |    |            |            |           |            |    |                                                                                                                                                          |                                                                                                                                                                                           |                                                                                                                   |
|------|--------|--------|----|------------|------------|-----------|------------|----|----------------------------------------------------------------------------------------------------------------------------------------------------------|-------------------------------------------------------------------------------------------------------------------------------------------------------------------------------------------|-------------------------------------------------------------------------------------------------------------------|
|      |        |        |    |            |            |           |            |    | glucoside; {(1R,2R)-2-[4-(β-D-glucopyranosyloxy)pentyl]-3-oxocyclopentyl}acetic acid [Jasmonic acids [FA0202]]                                           |                                                                                                                                                                                           |                                                                                                                   |
| 7153 | -1.619 | -1.227 | Ph | 577.135234 | 578.142510 | 0.145859  | C30H26O12  | 22 | Epicatechin-(4β->8)-ent-epicatechin                                                                                                                      | Procyanidin B4; Catechin-(4α->8)-epicatechin                                                                                                                                              | Procyanidin B2; Procyanidol B2                                                                                    |
| 1733 | -1.603 | -1.800 | Ph | 305.124160 | 306.131437 | 0.457167  | C12H20N2O7 | 1  | O18 isotope of 2'-Deoxymugineic acid                                                                                                                     |                                                                                                                                                                                           |                                                                                                                   |
| 3967 | -1.597 | -1.371 | Ph | 389.124168 | 390.131444 | -0.060382 | C20H22O8   | 5  | Piceid; Polydatin; 3,4,5-Trihydroxystilbene-3-β-monoglucoside                                                                                            | Populin                                                                                                                                                                                   | Apigeniflavan 5-O-xyloside [Flavans, Flavanols and Leucoanthocyanidins [PK1202]]                                  |
| 3651 | -1.590 | -1.643 | Ph | 377.160554 | 378.167830 | -0.061522 | C20H26O7   | 5  | Chaparrinone                                                                                                                                             | Cnicin                                                                                                                                                                                    | Eupahyssopin                                                                                                      |
| 4289 | -1.586 | -1.765 | Ph | 403.124570 | 404.131847 | -0.036646 | C17H24O11  | 2  | Gardenoside                                                                                                                                              | Scandoside methyl ester                                                                                                                                                                   |                                                                                                                   |
| 4511 | -1.585 | -1.967 | Lp | 413.218120 | 414.225397 | 0.069673  | C21H34O8   | 3  | methyl 5-hydroperoxy-6,8,9,11-bisepidioxy-12,14-eicosadienoate [Hydroperoxy fatty acids [FA0104]]                                                        | methyl 9,11-epidioxy-12,15-dihydroperoxy-5,7,13-eicosatrienoate [Hydroxy/hydroperoxyeicosatrienoic acids [FA0305]]                                                                        | methyl 6,8-epidioxy-5,15-dihydroperoxy-9,11,13-eicosatrienoate [Hydroxy/hydroperoxyeicosatrienoic acids [FA0305]] |
| 2807 | -1.560 | -1.481 | Cb | 347.134705 | 348.141981 | -0.146980 | C15H24O9   | 1  | Leonuridine                                                                                                                                              |                                                                                                                                                                                           |                                                                                                                   |
| 1303 | -1.544 | -1.835 | Ph | 281.139425 | 282.146702 | -0.078970 | C15H22O5   | 6  | Hymenoxon                                                                                                                                                | Qing Hau Sau; Artemisinin                                                                                                                                                                 | Dihydrophaseic acid; (-)-Dihydrophaseic acid                                                                      |
| 4441 | -1.541 | -1.531 | Ph | 409.150412 | 410.157688 | 0.014166  | C20H26O9   | 2  | Bruceine D                                                                                                                                               | C20H26O9                                                                                                                                                                                  |                                                                                                                   |
| 80   | -1.538 | -1.984 | Cb | 179.056091 | 180.063368 | -0.114407 | C6H12O6    | 69 | D-Glucose; Grape sugar; Dextrose                                                                                                                         | D-Fructose; Levulose; Fruit sugar; D-arabino-Hexulose                                                                                                                                     | D-Galactose                                                                                                       |
| 1351 | -1.532 | -1.627 | Cb | 285.097947 | 286.105223 | -0.104355 | C13H18O7   | 4  | Salicin; Salicoside                                                                                                                                      | Gastrodin; 4-(Hydroxymethyl)phenyl-β-D-glucopyranoside                                                                                                                                    | Methylarbutin                                                                                                     |
| 3540 | -1.529 | -1.619 | Ph | 373.113993 | 374.121269 | -0.074217 | C16H22O10  | 4  | Secologanate                                                                                                                                             | Swertiamarin                                                                                                                                                                              | Geniposidic acid                                                                                                  |
| 5778 | -1.528 | -1.528 | Cb | 485.082492 | 486.089768 | 0.446498  | C20H20O14  | 1  | O18 isotope of 1-O,6-O-Digalloyl-β-D-glucose                                                                                                             |                                                                                                                                                                                           |                                                                                                                   |
| 2684 | -1.519 | -1.787 | Cb | 343.124543 | 344.131820 | -0.121434 | C12H24O11  | 4  | Melibiiitol; 6-O-α-D-Galactosyl-D-glucitol                                                                                                               | Clusianose                                                                                                                                                                                | Maltitol; 4-[3,4,5-trihydroxy-6-(hydroxymethyl)oxan-2-yl]oxyhexane-1,2,3,5,6-pentol [acetal]                      |
| 2222 | -1.506 | -1.601 | Cb | 325.113981 | 326.121258 | -0.120525 | C12H22O10  | 6  | α-L-Fucosyl-1,2-β-D-galactoside; Glycoprotein α-L-fucosyl-(1,2)-D-galactose; Glycolipid α-L-fucosyl-1,2-β-D-galactose; α-L-Fucosyl-(1->2)-D-galactosyl-R | 2-O-α-L-Rhamnopyranosyl-D-glucopyranose; Neohesperidose                                                                                                                                   | Robinobiose                                                                                                       |
| 6404 | -1.504 | -1.603 | Ph | 521.202869 | 522.210145 | 0.064409  | C26H34O11  | 2  | Isobrucein A                                                                                                                                             | Quassamarin                                                                                                                                                                               |                                                                                                                   |
| 3922 | -1.497 | -2.042 | Lp | 387.166034 | 388.173310 | -0.057526 | C18H28O9   | 2  | Tuberonic acid glucoside                                                                                                                                 | Tuberonic acid glucoside (see KEGG C08558); (1R,2S)-3-oxo-2-(5'-O-β-D-glucopyranosyloxy-2'Z-pentenyl)-cyclopentaneacetic acid [Fatty acyl glycosides of mono- and disaccharides [FA1301]] |                                                                                                                   |

|      |        |        |    |            |            |           |            |    |                                                                                                                                                      |                                                                                                                                                     |                                                                                                         |
|------|--------|--------|----|------------|------------|-----------|------------|----|------------------------------------------------------------------------------------------------------------------------------------------------------|-----------------------------------------------------------------------------------------------------------------------------------------------------|---------------------------------------------------------------------------------------------------------|
| 199  | -1.489 | -1.629 | Ph | 205.035328 | 206.042604 | -0.236504 | C7H10O7    | 7  | (R)-2-Hydroxybutane-1,2,4-tricarboxylate; Homocitrate; Homocitric acid; 3-Hydroxy-3-carboxyadipic acid; (R)-2-Hydroxy-1,2,4-butanetricarboxylic acid | 2-Methylcitrate; 2-Hydroxybutane-1,2,3-tricarboxylate; (2R,3S)-2-Hydroxybutane-1,2,3-tricarboxylate                                                 | (2S,3R)-3-Hydroxybutane-1,2,3-tricarboxylate; Methylisocitrate; Methylisocitric acid                    |
| 2088 | -1.470 | -1.476 | Pp | 320.062277 | 321.069553 | -0.132751 | C11H15NO10 | 1  | $\beta$ -Citryl-L-glutamic acid; 3-[[[(2S)-1,5-dihydroxy-1, 5-dioxopentan-2-yl]carbamoyl]-3-hydroxypentanedioic acid [tertiary alcohol]              |                                                                                                                                                     |                                                                                                         |
| 3977 | -1.467 | -1.400 | Cb | 389.218068 | 390.225344 | -0.061128 | C19H34O8   | 2  | Rehmaionoside A                                                                                                                                      | Rehmaionoside B                                                                                                                                     |                                                                                                         |
| 3598 | -1.437 | -1.789 | Cb | 375.202440 | 376.209716 | -0.005151 | C18H32O8   | 1  | 2,3-di-O-hexanoyl- $\alpha$ -glucopyranose [Other acyl sugars [SL05]]                                                                                |                                                                                                                                                     |                                                                                                         |
| 3508 | -1.433 | -1.751 | Lp | 371.243903 | 372.251179 | -0.025932 | C20H36O6   | 5  | 8,8a-Deoxyoleandolide                                                                                                                                | 19(R)-hydroxy-PGF1 $\alpha$ ; 9S,11R,15S,19R-tetrahydroxy-13E-prostaenoic acid [Prostaglandins [FA0301]]                                            | 13,14-dihydro-19(R)-hydroxyPGE1; 9-oxo-11R,15S,19R-trihydroxy-prostanoic acid [Prostaglandins [FA0301]] |
| 2074 | -1.420 | -1.372 | Cb | 319.139804 | 320.147080 | -0.116812 | C14H24O8   | 2  | Valproic acid glucuronide (see KEGG C03033); 3,4,5-trihydroxy-6-(2-propylpentanoyloxy)oxane-2-carboxylic acid [secondary alcohol]                    | Octanoylglucuronide (see KEGG C03033) [secondary alcohol]                                                                                           |                                                                                                         |
| 6097 | -1.407 | -1.308 | Cb | 503.161797 | 504.169074 | 0.077257  | C18H32O16  | 21 | Raffinose; Melitose; Melitriose; Gossypose; 6G- $\alpha$ -D-galactosylsucrose                                                                        | Panose                                                                                                                                              | Galactomannan; Galactomannoglycan                                                                       |
| 7699 | -1.389 | -1.146 | Ph | 633.073451 | 634.080728 | 0.180016  | C27H22O18  | 1  | Corilagin                                                                                                                                            |                                                                                                                                                     |                                                                                                         |
| 574  | -1.380 | -1.420 | Lp | 255.232918 | 256.240194 | -0.141782 | C16H32O2   | 23 | Hexadecanoic acid; Hexadecanoate; Hexadecylic acid; Palmitic acid; Palmitate; Cetylic acid                                                           | Palmitic acid (see KEGG C00249); Hexadecanoic acid [carboxylic acid]                                                                                | Trimethyltridecanoic acid; 4,8,12-trimethyltridecanoic acid [carboxylic acid]                           |
| 1730 | -1.378 | -1.467 | Pp | 305.087764 | 306.095041 | 0.422086  | C11H16N2O8 | 2  | <i>O18 isotope of N-Acetyl-aspartyl-glutamate; NAAG</i>                                                                                              | <i>O18 isotope of N-Acetylaspartylglutamic acid (see KEGG C12270); 2-[(2-acetamido-3-carboxypropanoyl)amino]pentanedioic acid [carboxylic acid]</i> |                                                                                                         |
| 1586 | -1.363 | -1.218 | Ph | 299.077209 | 300.084485 | -0.108396 | C13H16O8   | 1  | 4-( $\beta$ -D-Glucosyloxy)benzoate                                                                                                                  |                                                                                                                                                     |                                                                                                         |
| 4335 | -1.358 | -1.064 | Ph | 405.119098 | 406.126375 | -0.018591 | C20H22O9   | 7  | Astringin                                                                                                                                            | Trichocarpin                                                                                                                                        | Anadanthoside [Flavans, Flavanols and Leucoanthocyanidins [PK1202]]                                     |
| 7306 | -1.352 | -1.032 | Cb | 593.130164 | 594.137440 | 0.167509  | C30H26O13  | 16 | Tribuloside                                                                                                                                          | Apigenin 7-glucoside-4'- <i>trans</i> -caffeate [Flavones and Flavonols [PK1211]]                                                                   | Apigenin 7-(6"-E-Caffeoylglucoside) [Flavones and Flavonols [PK1211]]                                   |
| 3145 | -1.292 | -1.382 | Cb | 359.098337 | 360.105614 | -0.091802 | C15H20O10  | 1  | 3-Methoxy-4-hydroxyphenylglycol glucuronide (see KEGG C03033);                                                                                       |                                                                                                                                                     |                                                                                                         |

|      |        |        |     |            |            |           |            |    |                                                                                                                                                       |                                                                                                                                                         |                                                                                                                                                          |
|------|--------|--------|-----|------------|------------|-----------|------------|----|-------------------------------------------------------------------------------------------------------------------------------------------------------|---------------------------------------------------------------------------------------------------------------------------------------------------------|----------------------------------------------------------------------------------------------------------------------------------------------------------|
| 2575 | -1.287 | -1.307 | Cb  | 339.093245 | 340.100522 | -0.117669 | C12H20O11  | 4  | (2S,3S,4S,5R,6R)-3,4,5-trihydroxy-6-[2-hydroxy-2-(4-hydroxy-3-methoxy-phenyl)ethoxy]oxane-2-carboxylic acid [acetal]                                  | 3-Ketolactose                                                                                                                                           | 3-Ketosucrose; 3-Dehydro- $\alpha$ -D-glucosyl- $\beta$ -D-fructofuranoside                                                                              |
| 291  | -1.279 | -1.736 | Cb  | 221.066628 | 222.073904 | -0.220142 | C8H14O7    | 4  | Cellobiono-1,5-lactone; Cellobiose-1,5-lactone                                                                                                        | 6-Acetyl- $\beta$ -D-galactoside                                                                                                                        | Ethyl glucuronide; (2S,3S,4S,5R)-6-ethoxy-3,4,5-trihydroxyoxane-2-carboxylic acid [acetal]                                                               |
| 5262 | -1.261 | -1.114 | Ph  | 455.353108 | 456.360385 | 0.086530  | C30H48O3   | 20 | Betulinic acid                                                                                                                                        | $\alpha$ -Elemolic acid                                                                                                                                 | Ursolic acid                                                                                                                                             |
| 4329 | -1.226 | -1.712 | Ph  | 405.082709 | 406.089985 | -0.028041 | C19H18O10  | 7  | Lancerin; 4-C-Glucosyl-1,3,7-trihydroxyxanthone                                                                                                       | 5,7,3',5'-Tetrahydroxy-3,6,8,4'-tetramethoxyflavone [Flavones and Flavonols [PK1211]]                                                                   | 5,7,3',4'-Tetrahydroxy-3,6,8,5'-tetramethoxyflavone [Flavones and Flavonols [PK1211]]                                                                    |
| 5658 | -1.183 | -1.001 | Cb  | 479.083140 | 480.090416 | 0.053553  | C21H20O13  | 18 | Gossypin; Gossypetin 8-O-glucoside                                                                                                                    | 4-o-Galloylbergenin                                                                                                                                     | 11-o-Galloylbergenin                                                                                                                                     |
| 224  | -1.134 | -1.746 | Cb  | 209.066629 | 210.073905 | -0.227478 | C7H14O7    | 5  | Sedoheptulose; D-altro-Heptulose; D-Sedoheptulose; Volemulose                                                                                         | $\alpha$ -D-Mannoheptulopyranose; Mannoheptulose                                                                                                        | $\beta$ -D-Sedoheptulopyranose; $\beta$ -D-Sedoheptulose                                                                                                 |
| 2506 | -1.060 | -2.069 | AmS | 336.129968 | 337.137244 | -0.110462 | C13H23NO9  | 3  | Streptobiosamine                                                                                                                                      |                                                                                                                                                         |                                                                                                                                                          |
| 8856 | -1.010 | -0.816 | Lp  | 831.502796 | 832.510072 | -0.128394 | C43H77O13P | 12 | PI(14:0/20:3(8Z,11Z,14Z)); 1-tetradecanoyl-2-(8Z,11Z,14Z-eicosatrienoyl)-glycero-3-phospho-(1'-myo-inositol) [Diacylglycerophosphoinositols [GP0601]] | PI(14:1(9Z)/20:2(11Z,14Z)); 1-(9Z-tetradecenoyl)-2-(11Z,14Z-eicosadienoyl)-glycero-3-phospho-(1'-myo-inositol) [Diacylglycerophosphoinositols [GP0601]] | PI(17:1(9Z)/17:2(9Z,12Z)); 1-(9Z-heptadecenoyl)-2-(9Z,12Z-heptadecadienoyl)-glycero-3-phospho-(1'-myo-inositol) [Diacylglycerophosphoinositols [GP0601]] |
| 6992 | -0.942 | -0.942 | Ph  | 563.177052 | 564.184328 | 0.065793  | C27H32O13  | 6  | Pinocembrin 7-rhamnosylglucoside                                                                                                                      | Cascaroside D                                                                                                                                           | Cascaroside C                                                                                                                                            |
| 6072 | -0.779 | -0.905 | Cb  | 501.146171 | 502.153448 | 0.125686  | C18H30O16  | 1  | $\alpha$ -L-Rhamnopyranosyl-(1->2)- $\beta$ -D-galactopyranosyl-(1->2)- $\beta$ -D-glucuronopyranoside; $\beta$ -Fabatriose                           |                                                                                                                                                         |                                                                                                                                                          |

**j) List of the 165 identified compounds from the 761 common significant *m/z* of combined WSHS stresses samples at time A.** Functional category counts: Ph:87; Lp:23; Cb:35; Pp:6; AmS:4; Nu:0; NM:10.

| ID   | WSHS<br><i>Ds</i> -NI | WSHS<br><i>Np</i> -NI | Cat. | <i>m/z</i> | Mass       | error<br>(ppm) | Formula    | n | Identification                                        |                                                                                                     |                |
|------|-----------------------|-----------------------|------|------------|------------|----------------|------------|---|-------------------------------------------------------|-----------------------------------------------------------------------------------------------------|----------------|
| 5781 | -2.818                | -2.818                | Ph   | 485.108961 | 486.116238 | 0.054370       | C24H22O11  | 2 | Flavonol 3-O-(6-O-malonyl- $\beta$ -D-glucoside)      | Epigallocatechin 3-O-(3,5-di-O-methylgallate) [Flavans, Flavanols and Leucoanthocyanidins [PK1202]] |                |
| 1087 | -2.766                | -2.766                | Pp   | 265.144542 | 266.151818 | 0.677275       | C14H20N2O3 | 6 | <i>O18</i> isotope of Subaphyllin; Feruloylputrescine | <i>Mukaadial</i>                                                                                    | <i>Rugosal</i> |



|      |        |        |    |            |            |           |           |    |                                                                                                   |                                                                                                                     |                                                                                                                                                                                                         |
|------|--------|--------|----|------------|------------|-----------|-----------|----|---------------------------------------------------------------------------------------------------|---------------------------------------------------------------------------------------------------------------------|---------------------------------------------------------------------------------------------------------------------------------------------------------------------------------------------------------|
| 5566 | -2.662 | -2.298 | Ph | 473.363676 | 474.370953 | 0.090535  | C30H50O4  | 15 | Sapelin A                                                                                         | Bryodulcosigenin                                                                                                    | Soyasapogenol A                                                                                                                                                                                         |
| 4717 | -2.655 | -2.791 | Ph | 425.087827 | 426.095103 | 0.049636  | C22H18O9  | 2  | Epiafzelechin 3-O-gallate [Flavans, Flavanols and Leucoanthocyanidins [PK1202]]                   | Epigallocatechin 3-O-(4-hydroxybenzoate) [Flavans, Flavanols and Leucoanthocyanidins [PK1202]]                      |                                                                                                                                                                                                         |
| 1130 | -2.584 | -2.584 | Ph | 269.045564 | 270.052841 | 0.064429  | C15H10O5  | 42 | Apigenin; 4',5,7-Trihydroxyflavone; 5,7,4'-Trihydroxyflavone                                      | 2'-Hydroxydaidzein                                                                                                  | Genistein; 5,7,4'-Trihydroxyisoflavone                                                                                                                                                                  |
| 7699 | -2.575 | -2.997 | Ph | 633.073451 | 634.080728 | 0.180016  | C27H22O18 | 1  | Corilagin                                                                                         |                                                                                                                     |                                                                                                                                                                                                         |
| 5278 | -2.563 | -2.563 | Ph | 457.077691 | 458.084967 | 0.122575  | C22H18O11 | 7  | Epigallocatechin 3-gallate                                                                        | 8-Demethyltetracenomycin C                                                                                          | Epigallocatechin gallate (see KEGG C09731); [(2R,3R)-5,7-dihydroxy-2-(3,4,5-trihydroxyphenyl)chroman-3-yl] 3,4,5-trihydroxybenzoate [phenol or hydroxyhetarene] Traumatins; (10E)-12-Oxododecenoic acid |
| 233  | -2.480 | -2.480 | Lp | 211.133944 | 212.141220 | -0.115861 | C12H20O3  | 15 | Cucurbitic acid                                                                                   | Putaminoxin                                                                                                         |                                                                                                                                                                                                         |
| 5457 | -2.465 | -2.645 | Ph | 467.098394 | 468.105671 | 0.051411  | C24H20O10 | 2  | Epigallocatechin 3-O-cafeate [Flavans, Flavanols and Leucoanthocyanidins [PK1202]]                | Apocynin A [Flavans, Flavanols and Leucoanthocyanidins [PK1202]]                                                    |                                                                                                                                                                                                         |
| 3970 | -2.462 | -2.462 | Ph | 389.160552 | 390.167829 | -0.062778 | C21H26O7  | 2  | Erioflorin acetate                                                                                |                                                                                                                     |                                                                                                                                                                                                         |
| 5778 | -2.458 | -2.458 | Cb | 485.082492 | 486.089768 | 0.446498  | C20H20O14 | 1  | <i>O18 isotope of 1-O,6-O-Digalloyl-β-D-glucose</i>                                               |                                                                                                                     |                                                                                                                                                                                                         |
| 132  | -2.410 | -2.410 | Ph | 191.034952 | 192.042228 | -0.159394 | C10H8O4   | 10 | Scopoletin                                                                                        | Naphthazarin; 5,8-Dihydroxy-1,4-naphthoquinone                                                                      | 3,4-Dehydro-6-hydroxymellein                                                                                                                                                                            |
| 5733 | -2.375 | -2.375 | Ph | 483.093470 | 484.100746 | 0.382970  | C24H20O11 | 2  | Tetracenomycin X                                                                                  |                                                                                                                     |                                                                                                                                                                                                         |
| 3099 | -2.369 | -2.369 | Ph | 357.107697 | 358.114974 | -0.013607 | C16H20O9  | 4  | <i>O18 isotope of Gentiopicroin; Gentiopicroside</i>                                              | <i>O18 isotope of 1-O-Feruloyl-β-D-glucose; 1-Feruloyl-D-glucose</i>                                                | <i>O18 isotope of Gentiopicroin (see KEGG C09782) [C10 isoprenoids (monoterpenes) [PR0102]]</i>                                                                                                         |
| 3831 | -2.353 | -2.353 | Ph | 384.145333 | 385.152609 | 0.187448  | C21H23NO6 | 1  | Polycarpine                                                                                       |                                                                                                                     |                                                                                                                                                                                                         |
| 6042 | -2.337 | -2.337 | NM | 499.291301 | 500.298577 | 0.088261  | C26H44O9  | 1  | Mupirocin                                                                                         |                                                                                                                     |                                                                                                                                                                                                         |
| 1843 | -2.335 | -2.474 | Ph | 310.093192 | 311.100468 | -0.108516 | C14H17NO7 | 4  | Taxiphyllin; (R)-4-Hydroxymandelonitrile β-D-glucoside                                            | Dhurrin; (S)-4-Hydroxymandelonitrile β-D-glucoside                                                                  | p-Glucosyloxymandelonitrile                                                                                                                                                                             |
| 4635 | -2.320 | -2.320 | Ph | 421.186827 | 422.194104 | 0.084740  | C22H30O8  | 4  | Valtratum; Valtrate                                                                               | Isovaltrate                                                                                                         | Picrasin F                                                                                                                                                                                              |
| 3088 | -2.319 | -2.319 | Ph | 357.061579 | 358.068856 | -0.032332 | C18H14O8  | 10 | 5,3'-Dihydroxy-4',5'-dimethoxy-6,7-methylenedioxyisoflavone [Isoflavonoids [PK1205]]              | Dalpalatin [Isoflavonoids [PK1205]]                                                                                 | Luteolin 7-lactate [Flavones and Flavonols [PK1211]]                                                                                                                                                    |
| 5262 | -2.317 | -2.187 | Ph | 455.353108 | 456.360385 | 0.086530  | C30H48O3  | 20 | Betulonic acid                                                                                    | α-Elementic acid                                                                                                    | Ursolic acid                                                                                                                                                                                            |
| 4511 | -2.304 | -1.932 | Lp | 413.218120 | 414.225397 | 0.069673  | C21H34O8  | 3  | methyl 5-hydroperoxy-6,8,9,11-bisepidioxy-12,14-eicosadienoate [Hydroperoxy fatty acids [FA0104]] | methyl 9,11-epidioxy-12,15-dihydroperoxy-5,7,13-eicosatrienoate [Hydroxy/hydroperoxyeicosatrien oic acids [FA0305]] | methyl 6,8-epidioxy-5,15-dihydroperoxy-9,11,13-eicosatrienoate [Hydroxy/hydroperoxyeicosatrien oic acids [FA0305]]                                                                                      |
| 4985 | -2.295 | -2.728 | Ph | 441.082837 | 442.090114 | 0.264769  | C22H18O10 | 10 | Robinetinidol 3-O-gallate [Flavans, Flavanols and Leucoanthocyanidins [PK1202]]                   | ent-Robinetinidol 3-O-gallate [Flavans, Flavanols and Leucoanthocyanidins [PK1202]]                                 | Catechin 3-O-gallate [Flavans, Flavanols and Leucoanthocyanidins [PK1202]]                                                                                                                              |
| 4377 | -2.291 | -2.291 | Ph | 407.077314 | 408.084590 | 0.179320  | C22H16O8  | 4  | Tetracenomycin E                                                                                  | Tetracenomycin B2                                                                                                   | Torosaflavone C [Flavones and Flavonols [PK1211]]                                                                                                                                                       |

|      |        |        |    |            |            |           |           |    |                                                                                                                                                                                                                                                      |                                                                                                                         |                                                                                                                                                              |
|------|--------|--------|----|------------|------------|-----------|-----------|----|------------------------------------------------------------------------------------------------------------------------------------------------------------------------------------------------------------------------------------------------------|-------------------------------------------------------------------------------------------------------------------------|--------------------------------------------------------------------------------------------------------------------------------------------------------------|
| 2893 | -2.258 | -2.258 | Lp | 350.306446 | 351.313723 | -0.019531 | C22H41NO2 | 11 | Anandamide (20:2, n-6); N-(11Z,14Z-eicosadienoyl)-ethanolamine [N-acyl ethanolamines (endocannabinoids) [FA0804]]                                                                                                                                    |                                                                                                                         |                                                                                                                                                              |
| 3591 | -2.248 | -2.415 | Ph | 375.129648 | 376.136925 | -0.059642 | C16H24O10 | 3  | Loganate; Loganic acid                                                                                                                                                                                                                               | 7-Epiloganic acid                                                                                                       | $\alpha$ -Tocotrienol (see KEGG C14153); (2R)-2,5,7,8-tetramethyl-2-[(3E,7E)-4,8,12-trimethyltrideca-3,7,11-trienyl]chroman-6-ol [phenol or hydroxyhetarene] |
| 4688 | -2.246 | -2.246 | Lp | 423.326893 | 424.334170 | 0.092124  | C29H44O2  | 4  | $\alpha$ -Tocotrienol                                                                                                                                                                                                                                | 4,4'-Methylenebis(2,6-di-tert-butylphenol)                                                                              |                                                                                                                                                              |
| 4730 | -2.237 | -2.237 | Ph | 425.181737 | 426.189014 | 0.073384  | C21H30O9  | 2  | Absciscic acid glucose ester; absciscic acid- $\beta$ -D-glucopyranosyl ester                                                                                                                                                                        | $\gamma$ -CEHC Glc; $\gamma$ -carboxyethyl-hydroxychroman $\beta$ -D-glucoside [Vitamin E [PR0202]]                     |                                                                                                                                                              |
| 2684 | -2.216 | -2.383 | Cb | 343.124543 | 344.131820 | -0.121434 | C12H24O11 | 4  | Melibiotol; 6-O- $\alpha$ -D-Galactosyl-D-glucitol                                                                                                                                                                                                   | Clusianose                                                                                                              | Maltitol; 4-[3,4,5-trihydroxy-6-(hydroxymethyl)oxan-2-yl]oxyhexane-1,2,3,5,6-pentol [acetal]                                                                 |
| 5171 | -2.211 | -2.372 | Ph | 451.103475 | 452.110751 | 0.041592  | C24H20O9  | 6  | Cinchonain 1a                                                                                                                                                                                                                                        | 9,10-Dihydro-10-(3,4-dihydroxyphenyl)-pyrano[2,3-h]catechin-8-one [Flavans, Flavanols and Leucoanthocyanidins [PK1202]] | Cinchonain Ib [Flavans, Flavanols and Leucoanthocyanidins [PK1202]]                                                                                          |
| 4599 | -2.210 | -2.210 | Ph | 419.171164 | 420.178440 | 0.053946  | C22H28O8  | 6  | Eupacunolin                                                                                                                                                                                                                                          | Eupacunoxin                                                                                                             | Eupaformosanin                                                                                                                                               |
| 4636 | -2.209 | -2.114 | Cb | 421.207924 | 422.215201 | 0.008100  | C19H34O10 | 1  | 1-Octen-3-ol-3-o- $\beta$ -D-xylopyranosyl(1->6)- $\beta$ -D-glucopyranoside                                                                                                                                                                         |                                                                                                                         |                                                                                                                                                              |
| 306  | -2.204 | -2.204 | Ph | 223.133928 | 224.141204 | -0.180408 | C13H20O3  | 8  | Vomifoliol; (6S,9R)-6-hydroxy-3-oxo- $\alpha$ -ionol                                                                                                                                                                                                 | (+/-)-6-Hydroxy-3-oxo- $\alpha$ -ionol                                                                                  | Methyl jasmonate; (-)-Methyl jasmonate                                                                                                                       |
| 1722 | -2.181 | -1.809 | Ph | 305.066640 | 306.073916 | -0.120233 | C15H14O7  | 11 | Leucocyanidin; 2-(3,4-Dihydroxyphenyl)-3,4-dihydro-2H-1-benzopyran-3,4,5,7-tetrol; 3,3',4,4',5,7-Flavanhexol; 3,4-Cyanidiol; Leucoanthocyanidol; Leucocianidol; Leucocyanidol; Leukocyanidine; Procyanidol; Resivit; 2,3-trans-3,4-cis-Leucocyanidin | (+)-Gallocatechin; Gallocatechol                                                                                        | (-)-Epigallocatechin                                                                                                                                         |
| 1583 | -2.176 | -2.176 | Ph | 299.056112 | 300.063389 | 0.002400  | C16H12O6  | 77 | 5,7,4'-Trihydroxy-3'-methoxyflavone; 3'-O-Methylfluteolin; Chrysoeriol                                                                                                                                                                               | 3-Methoxyapigenin; 3-O-Methylkaempferol                                                                                 | Leptosidin                                                                                                                                                   |
| 3926 | -2.176 | -2.584 | Cb | 387.202414 | 388.209691 | -0.070880 | C19H32O8  | 5  | Rehmaionoside C                                                                                                                                                                                                                                      | methyl 9-hydroperoxy-10,12,13,15-bisepidioxy-16E-octadecenoate [Hydroperoxy fatty acids [FA0104]]                       | methyl 10,12,13,15-bisepidioxy-16-hydroperoxy-8E-octadecenoate [Hydroperoxy fatty acids [FA0104]]                                                            |
| 6299 | -2.172 | -2.172 | Lp | 515.286219 | 516.293495 | 0.092665  | C26H44O10 | 2  | L-Olivosyl-oleandolide                                                                                                                                                                                                                               | L-Olivosyl-oleandolide (see KEGG C11991) [Macrolides and lactone polyketides [PK04]]                                    |                                                                                                                                                              |

|      |        |        |     |            |            |           |            |    |                                                                                                                                                          |                                                                                                                                               |                                                                                                                                                                                         |
|------|--------|--------|-----|------------|------------|-----------|------------|----|----------------------------------------------------------------------------------------------------------------------------------------------------------|-----------------------------------------------------------------------------------------------------------------------------------------------|-----------------------------------------------------------------------------------------------------------------------------------------------------------------------------------------|
| 1247 | -2.143 | -2.143 | Ph  | 277.092868 | 278.100145 | -0.082506 | C11H18O8   | 5  | Tuliposide A                                                                                                                                             | Isovalerylglucuronide (see KEGG C03033); (2S,3S,4S,5R,6S)-3,4,5-trihydroxy-6-(3-methylbutanoyloxy)oxane-2-carboxylic acid [secondary alcohol] |                                                                                                                                                                                         |
| 2506 | -2.134 | -2.071 | AmS | 336.129968 | 337.137244 | -0.110462 | C13H23NO9  | 3  | Streptobiosamine                                                                                                                                         |                                                                                                                                               |                                                                                                                                                                                         |
| 5460 | -2.126 | -2.126 | Ph  | 467.119547 | 468.126824 | 0.101485  | C21H24O12  | 3  | Catechin-4-ol 3-O-β-D-galactopyranoside [Flavans, Flavanols and Leucoanthocyanidins [PK1202]]                                                            | Catechin-4-ol 3-O-β-D-glycopyranoside [Flavans, Flavanols and Leucoanthocyanidins [PK1202]]                                                   | Leucodelphinidin 3-O-α-L-rhamnopyranoside [Flavans, Flavanols and Leucoanthocyanidins [PK1202]]                                                                                         |
| 6097 | -2.126 | -2.102 | Cb  | 503.161797 | 504.169074 | 0.077257  | C18H32O16  | 21 | Raffinose; Melitose; Melitriose; Gossypose; 6G-α-D-galactosylsucrose                                                                                     | Panose                                                                                                                                        | Galactomannan; Galactomannoglycan                                                                                                                                                       |
| 1303 | -2.121 | -2.121 | Ph  | 281.139425 | 282.146702 | -0.078970 | C15H22O5   | 6  | Hymenoxon                                                                                                                                                | Qing Hau Sau; Artemisinin                                                                                                                     | Dihydrophaseic acid; (-)-Dihydrophaseic acid                                                                                                                                            |
| 4338 | -2.116 | -2.362 | Ph  | 405.140233 | 406.147509 | -0.005430 | C17H26O11  | 4  | Ipolamiide                                                                                                                                               | 10-Hydroxyloganin                                                                                                                             | Morroniside                                                                                                                                                                             |
| 2347 | -2.105 | -2.304 | AmS | 330.119400 | 331.126676 | -0.122722 | C14H21NO8  | 1  | 5'-O-β-D-Glucosylpyridoxine                                                                                                                              |                                                                                                                                               |                                                                                                                                                                                         |
| 4393 | -2.102 | -2.795 | Ph  | 407.171139 | 408.178415 | -0.005805 | C21H28O8   | 2  | Vernoflexuoside                                                                                                                                          |                                                                                                                                               |                                                                                                                                                                                         |
| 3153 | -2.095 | -2.156 | Ph  | 359.134719 | 360.141996 | -0.102120 | C16H24O9   | 2  | 7-Deoxyloganate                                                                                                                                          | 8-Epideoxyloganic acid                                                                                                                        |                                                                                                                                                                                         |
| 3540 | -2.086 | -2.238 | Ph  | 373.113993 | 374.121269 | -0.074217 | C16H22O10  | 4  | Secologanate                                                                                                                                             | Swertiamarin                                                                                                                                  | Geniposidic acid                                                                                                                                                                        |
| 4590 | -2.077 | -1.202 | Ph  | 419.098382 | 420.105659 | 0.027948  | C20H20O10  | 7  | 5,3',5'-Trihydroxy-3,6,7,8,4'-pentamethoxyflavone [Flavones and Flavonols [PK1211]]                                                                      | 5,7,4'-Trihydroxy-3,6,8,3',5'-pentamethoxyflavone [Flavones and Flavonols [PK1211]]                                                           | 5,7,3'-Trihydroxy-3,6,8,4',5'-pentamethoxyflavone [Flavones and Flavonols [PK1211]]                                                                                                     |
| 3355 | -2.075 | -1.508 | AmS | 366.140542 | 367.147819 | -0.074144 | C14H25NO10 | 3  | N-Acetyl-6-O-L-fucosyl-D-glucosamine [aldehyde]                                                                                                          | 2-Acetamido-2-deoxy-6-O-α-L-fucopyranosyl-D-glucose [aldehyde]                                                                                | 3-O-fucopyranosyl-2-acetamido-2-deoxyglucopyranose; N-[(2R,3R,4R,5R)-4,5,6-trihydroxy-1-oxo-3-[(2R,3S,4R,5S,6S)-3,4,5-trihydroxy-6-methyl-oxan-2-yl]oxy-hexan-2-yl]acetamide [aldehyde] |
| 1158 | -2.056 | -2.056 | Ph  | 271.061181 | 272.068458 | -0.058348 | C15H12O5   | 37 | Naringenin; 4',5,7-Trihydroxyflavanone                                                                                                                   | (6aS,11aS)-3,6a,9-Trihydroxypterocarpan; 3,6,9-Trihydroxypterocarpan; (-)-Glycinol                                                            | Licodione                                                                                                                                                                               |
| 5493 | -2.050 | -1.744 | Ph  | 469.135176 | 470.142452 | 0.055729  | C21H26O12  | (1 | Plumieride                                                                                                                                               |                                                                                                                                               |                                                                                                                                                                                         |
| 1376 | -2.043 | -2.159 | Ph  | 287.056089 | 288.063365 | -0.079954 | C15H12O6   | 33 | Dihydrokaempferol; Aromadendrin; (+)-Dihydrokaempferol; (+)-Aromadendrin                                                                                 | Fustin; 2,3-Dihydrofisetin                                                                                                                    | Eriodictyol                                                                                                                                                                             |
| 80   | -2.026 | -2.246 | Cb  | 179.056091 | 180.063368 | -0.114407 | C6H12O6    | 69 | D-Glucose; Grape sugar; Dextrose                                                                                                                         | D-Fructose; Levulose; Fruit sugar; D-arabino-Hexulose                                                                                         | D-Galactose                                                                                                                                                                             |
| 2222 | -2.026 | -2.601 | Cb  | 325.113981 | 326.121258 | -0.120525 | C12H22O10  | 6  | α-L-Fucosyl-1,2-β-D-galactoside; Glycoprotein α-L-fucosyl-(1,2)-D-galactose; Glycolipid α-L-fucosyl-1,2-β-D-galactose; α-L-Fucosyl-(1->2)-D-galactosyl-R | 2-O-α-L-Rhamnopyranosyl-D-glucopyranose; Neohesperidose                                                                                       | Robinobiose                                                                                                                                                                             |
| 3977 | -2.025 | -2.552 | Cb  | 389.218068 | 390.225344 | -0.061128 | C19H34O8   | 2  | Rehmaionoside A                                                                                                                                          | Rehmaionoside B                                                                                                                               |                                                                                                                                                                                         |

|      |        |        |    |            |            |           |              |    |                                                                                                                                                                                |                                                                                        |                                                                                                                                                                      |
|------|--------|--------|----|------------|------------|-----------|--------------|----|--------------------------------------------------------------------------------------------------------------------------------------------------------------------------------|----------------------------------------------------------------------------------------|----------------------------------------------------------------------------------------------------------------------------------------------------------------------|
| 4022 | -2.017 | -2.017 | Ph | 391.128449 | 392.135726 | 0.030165  | C20H22O8     | 5  | O18 isotope of Piceid; Polydatin; 3,4,5-Trihydroxystilbene-3- $\beta$ -monoglucoside                                                                                           | O18 isotope of Populin                                                                 | O18 isotope of Apigeniflavan 5-O-xyloside [Flavans, Flavanols and Leucoanthocyanidins [PK1202]]                                                                      |
| 328  | -2.015 | -1.457 | Ph | 227.071321 | 228.078597 | -0.205916 | C14H12O3     | 10 | 3,4',5-Trihydroxystilbene; Resveratrol                                                                                                                                         | Seselin                                                                                | Trioxsalen; Trioxysalen; 4,8,5'-Trimethylpsoralen                                                                                                                    |
| 3544 | -2.003 | -2.128 | Ph | 373.150383 | 374.157659 | -0.062393 | C17H26O9     | 4  | Deoxyloganin; 7-Deoxyloganin                                                                                                                                                   | 8-Epideoxyloganin                                                                      | Deoxyloganin (see KEGG C06071) [C10 isoprenoids (monoterpenes) [PR0102]]                                                                                             |
| 1409 | -1.978 | -1.666 | Ph | 289.071731 | 290.079007 | -0.106598 | C15H14O6     | 35 | cis-3,4-Leucopelargonidin                                                                                                                                                      | Luteoforol; 3-Deoxyleuocyanidin                                                        | (+)-Catechin; D-Catechin; Cyanidanol; (2R-trans)-2-(3,4-dihydroxyphenyl)-3,4-dihydro-2H-1-Benzopyran-3,5,7-triol; (2R,3S)-Catechin; (2R,3S)-(+)-Catechin; Cianidanol |
| 3927 | -1.972 | -1.972 | Lp | 387.238811 | 388.246087 | -0.041617 | C20H36O7     | 1  | 5,6-Dihydroxyprostaglandin F1a (see KEGG C06475) [secondary alcohol]                                                                                                           |                                                                                        |                                                                                                                                                                      |
| 4441 | -1.971 | -2.412 | Ph | 409.150412 | 410.157688 | 0.014166  | C20H26O9     | 2  | Bruceine D                                                                                                                                                                     |                                                                                        |                                                                                                                                                                      |
| 3594 | -1.966 | -2.088 | NM | 375.166033 | 376.173310 | 0.410054  | C21H27ClN2O2 | 1  | Cl37 isotope of Hydroxyzine                                                                                                                                                    |                                                                                        |                                                                                                                                                                      |
| 1677 | -1.963 | -2.020 | Ph | 303.050993 | 304.058270 | -0.108829 | C15H12O7     | 7) | Taxifolin; Dihydroquercetin; (+)-Dihydroquercetin; (+)-Taxifolin; trans-Dihydroquercetin                                                                                       | Pentahydroxyflavanone; Dihydrotricetin                                                 | cis-Dihydroquercetin                                                                                                                                                 |
| 7306 | -1.938 | -1.894 | Cb | 593.130164 | 594.137440 | 0.167509  | C30H26O13    | 16 | Tribuloside                                                                                                                                                                    | Apigenin 7-glucoside-4'-trans-caffeate [Flavones and Flavonols [PK1211]]               | Apigenin 7-(6"-E-Caffeoylglucoside) [Flavones and Flavonols [PK1211]]                                                                                                |
| 4779 | -1.915 | -1.915 | Ph | 429.082814 | 430.090090 | 0.218359  | C21H18O10    | 4  | Coumestrol 3-O-glucoside [Coumestan flavonoids [PK1209]]                                                                                                                       | Chrysin 7-glucuronide [Flavones and Flavonols [PK1211]]                                | Derhamnosylmaysin [Flavones and Flavonols [PK1211]]                                                                                                                  |
| 2179 | -1.911 | -1.962 | Cb | 323.098329 | 324.105606 | -0.127735 | C12H20O10    | 2  | Bis-D-fructose 2',1:2,1'-dianhydride; Difructose anhydride I; Di-D-fructose 1,2'; 2,1' dianhydride                                                                             | D-Fructofuranose 1,2':2,3'-dianhydride                                                 |                                                                                                                                                                      |
| 4289 | -1.902 | -2.539 | Ph | 403.124570 | 404.131847 | -0.036646 | C17H24O11    | 2  | Gardenoside                                                                                                                                                                    | Scandoside methyl ester                                                                |                                                                                                                                                                      |
| 1864 | -1.896 | -2.139 | Cb | 311.098334 | 312.105610 | -0.117249 | C11H20O10    | 6  | Vicianose; O- $\alpha$ -L-Arabinopyranosyl-(1-6)-D-glucopyranose                                                                                                               | Arabino-galactose                                                                      | 6-O- $\beta$ -D-Xylopyranosyl-D-glucose; Primeverose                                                                                                                 |
| 3972 | -1.878 | -2.124 | Lp | 389.181684 | 390.188961 | -0.055764 | C18H30O9     | 1  | (-)-11-hydroxy-9,10-dihydrojasmonic acid 11- $\beta$ -D-glucoside; {(1R,2R)-2-[4-( $\beta$ -D-glucopyranosyloxy)pentyl]-3-oxocyclopentyl}acetic acid [Jasmonic acids [FA0202]] |                                                                                        |                                                                                                                                                                      |
| 191  | -1.857 | -2.203 | Pp | 203.082553 | 204.089830 | -0.236798 | C11H12N2O2   | 10 | L-Tryptophan; Tryptophan; (S)- $\alpha$ -Amino- $\beta$ -(3-indolyl)-propionic acid                                                                                            | D-Tryptophan                                                                           | Tryptophan; $\alpha$ -Amino- $\beta$ -(3-indolyl)-propionic acid                                                                                                     |
| 8565 | -1.851 | -1.473 | Lp | 741.471328 | 742.478604 | 0.160654  | C40H71O10P   | 18 | PG(16:1(9Z)/18:3(6Z,9Z,12Z)); 1-(9Z-hexadecenoyl)-2-(6Z,9Z,12Z-octadecatrienoyl)-sn-                                                                                           | PG(16:1(9Z)/18:3(9Z,12Z,15Z)); 1-(9Z-hexadecenoyl)-2-(9Z,12Z,15Z-octadecatrienoyl)-sn- | PG(18:3(6Z,9Z,12Z)/16:1(9Z)); 1-(6Z,9Z,12Z-octadecatrienoyl)-2-(9Z-hexadecenoyl)-sn-glycero-                                                                         |

|      |        |        |    |            |            |           |              |    |                                                                                                                                           |                                                                                                                                                |                                                                                                                                               |
|------|--------|--------|----|------------|------------|-----------|--------------|----|-------------------------------------------------------------------------------------------------------------------------------------------|------------------------------------------------------------------------------------------------------------------------------------------------|-----------------------------------------------------------------------------------------------------------------------------------------------|
| 7153 | -1.835 | -1.624 | Ph | 577.135234 | 578.142510 | 0.145859  | C30H26O12    | 22 | glycero-3-phospho-(1'-sn-glycerol) [primary alcohol]<br>Epicatechin-(4β->8)-ent-epicatechin                                               | glycero-3-phospho-(1'-sn-glycerol) [primary alcohol]<br>Procyanidin B4; Catechin-(4α->8)-epicatechin                                           | 3-phospho-(1'-sn-glycerol) [primary alcohol]<br>Procyanidin B2; Procyanidol B2                                                                |
| 5489 | -1.833 | -2.011 | Ph | 469.114066 | 470.121342 | 0.096923  | C24H22O10    | 2  | Pongamoside B [Flavones and Flavonols [PK1211]]                                                                                           | Pongamoside C [Flavones and Flavonols [PK1211]]                                                                                                |                                                                                                                                               |
| 5001 | -1.830 | -2.096 | Cb | 441.176638 | 442.183914 | 0.038479  | C21H30O10    | 1  | Lusitanicoside                                                                                                                            |                                                                                                                                                |                                                                                                                                               |
| 2057 | -1.817 | -1.992 | Ph | 319.045905 | 320.053181 | -0.113324 | C15H12O8     | 3  | Dihydromyricetin; Ampelopsin; (+)-Dihydromyricetin; (+)-Ampelopsin                                                                        | 2,3-Dihydrogossypetin                                                                                                                          | Amaranol A; (+)- 2,4,6-Trihydroxy-2-[(3,4,5-trihydroxyphenyl)methyl]-3(2H)-benzofuranone [Aurone flavonoids [PK1213]]                         |
| 6216 | -1.816 | -2.313 | Ph | 511.218562 | 512.225838 | 0.149097  | C25H36O11    | 1  | gibberellin A2 O-β-D-glucoside [C20 isoprenoids (diterpenes) [PR0104]]                                                                    |                                                                                                                                                |                                                                                                                                               |
| 1135 | -1.814 | -2.546 | Lp | 269.081904 | 270.089181 | -0.104475 | C16H14O4     | 35 | (+)-Medicarpin; 3-Hydroxy-9-methoxypterocarpan                                                                                            | Vignafuran                                                                                                                                     | Alloimperatorin                                                                                                                               |
| 1730 | -1.813 | -1.593 | Pp | 305.087764 | 306.095041 | 0.422086  | C11H16N2O8   | 2  | O18 isotope of N-Acetyl-aspartyl-glutamate; NAAG                                                                                          | O18 isotope of N-Acetyl-aspartylglutamic acid (see KEGG C12270); 2-[(2-acetamido-3-carboxy-propanoyl)amino]pentanedioic acid [carboxylic acid] |                                                                                                                                               |
| 3969 | -1.809 | -2.378 | NM | 389.145306 | 390.152582 | 0.415595  | C21H25ClN2O3 | 4  | Cl37 isotope of Cetirizine                                                                                                                | Cl37 isotope of Cetirizine (see KEGG C07778); 2-[2-[4-[(4-chlorophenyl)-phenyl-methyl]piperazin-1-yl]ethoxy]acetic acid [dialkyl ether]        | Loganin                                                                                                                                       |
| 4794 | -1.809 | -1.706 | Lp | 429.373813 | 430.381089 | 0.020016  | C29H50O2     | 11 | α-Tocopherol; Vitamin E                                                                                                                   | 4β-Hydroxymethyl-4α-methyl-5α-cholest-7-en-3β-ol                                                                                               | α-Tocopherol (see KEGG C02477); (2R)-2,5,7,8-tetramethyl-2-[(4R,8R)-4,8,12-trimethyltridecyl]chroman-6-ol [phenol or hydroxyhetarene]         |
| 8383 | -1.801 | -1.703 | Lp | 712.492329 | 713.499605 | 0.070622  | C39H72NO8P   | 30 | PE(14:0/20:3(5Z,8Z,11Z)) (see KEGG C00350); 1-tetradecanoyl-2-(5Z,8Z,11Z-eicosatrienoyl)-sn-glycero-3-phosphoethanolamine [primary amine] | PE(14:0/20:3(8Z,11Z,14Z)) (see KEGG C00350); 1-tetradecanoyl-2-(8Z,11Z,14Z-eicosatrienoyl)-sn-glycero-3-phosphoethanolamine [primary amine]    | PE(14:1(9Z)/20:2(11Z,14Z)) (see KEGG C00350); 1-(9Z-tetradecenoyl)-2-(11Z,14Z-eicosadienoyl)-sn-glycero-3-phosphoethanolamine [primary amine] |
| 291  | -1.778 | -2.619 | Cb | 221.066628 | 222.073904 | -0.220142 | C8H14O7      | 4  | 6-Acetyl-D-glucose                                                                                                                        | 6-Acetyl-β-D-galactoside                                                                                                                       | Ethyl glucuronide; (2S,3S,4S,5R)-6-ethoxy-3,4,5-trihydroxyoxane-2-carboxylic acid [acetal]                                                    |
| 2331 | -1.778 | -1.733 | Ph | 329.139407 | 330.146683 | -0.123563 | C19H22O5     | 7  | Podolide                                                                                                                                  | Gibberellin A51-catabolite                                                                                                                     | Gibberellin A7                                                                                                                                |
| 449  | -1.767 | -2.125 | Ph | 243.066250 | 244.073527 | -0.131492 | C14H12O4     | 10 | 3,3',4'5-Tetrahydroxystilbene; Piceatannol                                                                                                | Wyerone acid                                                                                                                                   | Eriobofuran                                                                                                                                   |
| 170  | -1.761 | -1.761 | Lp | 199.170322 | 200.177598 | -0.159280 | C12H24O2     | 13 | Dodecanoic acid; Dodecanoate; Dodecylcarboxylate; Lauric acid                                                                             | Dodecanoic acid (see KEGG C02679); Dodecanoic acid [carboxylic acid]                                                                           | Lauric acid (see KEGG C02679); dodecanoic acid [Straight chain fatty acids [FA0101]]                                                          |

|      |        |        |     |            |            |           |            |    |                                                                                                                                                                                                                                                |                                                                                                                                                                                           |                                                                                                         |
|------|--------|--------|-----|------------|------------|-----------|------------|----|------------------------------------------------------------------------------------------------------------------------------------------------------------------------------------------------------------------------------------------------|-------------------------------------------------------------------------------------------------------------------------------------------------------------------------------------------|---------------------------------------------------------------------------------------------------------|
| 6989 | -1.754 | -1.754 | Ph  | 563.140743 | 564.148019 | 0.201658  | C26H28O14  | 52 | Apigenin 7-O-[β-D-apiosyl-(1->2)-β-D-glucoside]; 7-O-(β-D-Apiofuranosyl-1,2-β-D-glucosyl)-5,7,4'-trihydroxyflavone; Apiin; 7-[(2-O-D-Apio-β-D-furanosyl-β-D-glucopyranosyl)oxy]-5-hydroxy-2-(4-hydroxy-phenyl)-4H-1-benzopyran-4-one; Apioside | Neoschaftoside                                                                                                                                                                            | Schaftoside                                                                                             |
| 4292 | -1.751 | -1.751 | Ph  | 403.139861 | 404.147137 | 0.048967  | C21H24O8   | 4  | Mallotophenone                                                                                                                                                                                                                                 | Koaburanin [Flavans, Flavanols and Leucoanthocyanidins [PK1202]]                                                                                                                          | Orientanol A [Pterocarpanes [PK1207]]                                                                   |
| 6404 | -1.747 | -1.948 | Ph  | 521.202869 | 522.210145 | 0.064409  | C26H34O11  | 2  | Isobrucein A                                                                                                                                                                                                                                   | Quassamarin                                                                                                                                                                               |                                                                                                         |
| 11   | -1.738 | -2.234 | Cb  | 161.045532 | 162.052809 | -0.091525 | C6H10O5    | 30 | Lichenin; Lichenan                                                                                                                                                                                                                             | (R)-3,3-Dimethylmalate                                                                                                                                                                    | 3-Ethylmalate                                                                                           |
| 3598 | -1.736 | -2.111 | Cb  | 375.202440 | 376.209716 | -0.005151 | C18H32O8   | 1  | 2,3-di-O-hexanoyl-α-glucopyranose [Other acyl sugars [SL05]]                                                                                                                                                                                   |                                                                                                                                                                                           |                                                                                                         |
| 5732 | -1.716 | -1.835 | Cb  | 483.078040 | 484.085316 | 0.022519  | C20H20O14  | 1  | 1-O,6-O-Digalloyl-β-D-glucose                                                                                                                                                                                                                  |                                                                                                                                                                                           |                                                                                                         |
| 2539 | -1.714 | -1.762 | Ph  | 337.113983 | 338.121259 | 0.392818  | C12H20N2O9 | 1  | O18 isotope of 3-Epihydroxymugineic acid                                                                                                                                                                                                       |                                                                                                                                                                                           |                                                                                                         |
| 2271 | -1.706 | -1.789 | Ph  | 327.108499 | 328.115775 | -0.129529 | C15H20O8   | 3  | Anisatin                                                                                                                                                                                                                                       | Paeonoside                                                                                                                                                                                |                                                                                                         |
| 3967 | -1.697 | -1.797 | Ph  | 389.124168 | 390.131444 | -0.060382 | C20H22O8   | 5  | Piceid; Polydatin; 3,4,5-Trihydroxystilbene-3-β-monoglucoside                                                                                                                                                                                  | Populin                                                                                                                                                                                   | Apigeniflavan 5-O-xyloside [Flavans, Flavanols and Leucoanthocyanidins [PK1202]]                        |
| 3918 | -1.691 | -2.229 | Cb  | 387.129645 | 388.136921 | -0.066108 | C17H24O10  | 5  | Secologanin; (-)-Secologanin                                                                                                                                                                                                                   | Geniposide                                                                                                                                                                                | Verbenalin; Cornin (glycoside)                                                                          |
| 224  | -1.686 | -1.919 | Cb  | 209.066629 | 210.073905 | -0.227478 | C7H14O7    | 5  | Sedoheptulose; D-altro-Heptulose; D-Sedoheptulose; Volemulose                                                                                                                                                                                  | α-D-Mannoheptulopyranose; Mannoheptulose                                                                                                                                                  | β-D-Sedoheptulopyranose; β-D-Sedoheptulose                                                              |
| 865  | -1.662 | -1.427 | Pp  | 263.077210 | 264.084487 | 0.530806  | C9H14N2O7  | 1  | O18 isotope of L-β-aspartyl-L-glutamic acid [primary amine]                                                                                                                                                                                    |                                                                                                                                                                                           |                                                                                                         |
| 4847 | -1.659 | -1.690 | Ph  | 433.114041 | 434.121318 | 0.048061  | C21H22O10  | 32 | Naringenin 7-O-β-D-glucoside; Prunin                                                                                                                                                                                                           | Phlorizin chalcone; Chalcone 2'-O-glucoside                                                                                                                                               | 2',4,4',6'-Tetrahydroxychalcone 4'-O-glucoside; THC 4'-glucoside                                        |
| 3922 | -1.659 | -1.817 | Lp  | 387.166034 | 388.173310 | -0.057526 | C18H28O9   | 2) | Tuberonic acid glucoside                                                                                                                                                                                                                       | Tuberonic acid glucoside (see KEGG C08558); (1R,2S)-3-oxo-2-(5'-O-β-D-glucopyranosyloxy-2'Z-pentenyl)-cyclopentaneacetic acid [Fatty acyl glycosides of mono- and disaccharides [FA1301]] |                                                                                                         |
| 4814 | -1.654 | -1.784 | Cb  | 431.155905 | 432.163181 | 0.044900  | C19H28O11  | 1  | Zizybeoside I                                                                                                                                                                                                                                  |                                                                                                                                                                                           |                                                                                                         |
| 4594 | -1.646 | -1.920 | Ph  | 419.134784 | 420.142061 | 0.067492  | C21H24O9   | 10 | Melampodin A                                                                                                                                                                                                                                   | Glycyphyllin; Phloretin 2'-O-rhamnoside                                                                                                                                                   | Isorhapontin                                                                                            |
| 3508 | -1.635 | -1.997 | Lp  | 371.243903 | 372.251179 | -0.025932 | C20H36O6   | 5  | 8,8a-Deoxyoleandolide                                                                                                                                                                                                                          | 19(R)-hydroxy-PGF1α; 9S,11R,15S,19R-tetrahydroxy-13E-prostaenoic acid [Prostaglandins [FA0301]]                                                                                           | 13,14-dihydro-19(R)-hydroxyPGE1; 9-oxo-11R,15S,19R-trihydroxy-prostanoic acid [Prostaglandins [FA0301]] |
| 6824 | -1.633 | -1.298 | Ph  | 549.182543 | 550.189820 | 0.089857  | C23H34O15  | 1  | Genipin 1-β-gentiobioside                                                                                                                                                                                                                      |                                                                                                                                                                                           |                                                                                                         |
| 3072 | -1.628 | -2.222 | AmS | 356.098668 | 357.105944 | -0.103781 | C15H19NO9  | 1  | cyclo-Dopa 5-O-glucoside                                                                                                                                                                                                                       |                                                                                                                                                                                           |                                                                                                         |



|      |        |        |    |            |            |           |              |    |                                                                                                                                                                                                    |                                                                                                                                                         |                                                                                                                                                          |
|------|--------|--------|----|------------|------------|-----------|--------------|----|----------------------------------------------------------------------------------------------------------------------------------------------------------------------------------------------------|---------------------------------------------------------------------------------------------------------------------------------------------------------|----------------------------------------------------------------------------------------------------------------------------------------------------------|
| 280  | -1.628 | -1.354 | Ph | 219.029852 | 220.037128 | -0.204938 | C11H8O5      | 4  | (3E)-4-(2-Carboxyphenyl)-2-oxobut-3-enoate; <i>trans</i> -2'-Carboxybenzalpyruvate                                                                                                                 | Purpurogallin                                                                                                                                           | (3Z)-4-(2-Carboxyphenyl)-2-oxobut-3-enoate; <i>cis</i> -2'-Carboxybenzalpyruvate                                                                         |
| 2614 | -1.627 | -1.623 | Cb | 341.108884 | 342.116161 | -0.149462 | C12H22O11    | 45 | Sucrose; Cane sugar; Saccharose; 1- $\alpha$ -D-Glucopyranosyl-2- $\beta$ -D-fructofuranoside                                                                                                      | Cellobiose; 1- $\beta$ -D-Glucopyranosyl-4-D-glucopyranose                                                                                              | Maltose; Malt sugar; $\alpha$ -D-Glucopyranosyl-(1->4)-D-glucopyranose                                                                                   |
| 1733 | -1.595 | -2.225 | Ph | 305.124160 | 306.131437 | 0.457167  | C12H20N2O7   | 1  | <i>O18 isotope of 2'-Deoxymugineic acid</i>                                                                                                                                                        |                                                                                                                                                         |                                                                                                                                                          |
| 1252 | -1.589 | -2.153 | NM | 277.144506 | 278.151783 | -0.095744 | C16H22O4     | 7  | 2-Ethylhexyl phthalate                                                                                                                                                                             | Dibutyl phthalate; Di-n-butyl phthalate; Dibutyl 1,2-benzenedicarboxylate                                                                               | Diisobutyl phthalate; DIBP                                                                                                                               |
| 8856 | -1.589 | -1.463 | Lp | 831.502796 | 832.510072 | -0.128394 | C43H77O13P   | 12 | PI(14:0/20:3(8Z,11Z,14Z)); 1-tetradecanoyl-2-(8Z,11Z,14Z-eicosatrienoyl)-glycero-3-phospho-(1'-myo-inositol) [Diacylglycerophosphoinositols [GP0601]]                                              | PI(14:1(9Z)/20:2(11Z,14Z)); 1-(9Z-tetradecenoyl)-2-(11Z,14Z-eicosadienoyl)-glycero-3-phospho-(1'-myo-inositol) [Diacylglycerophosphoinositols [GP0601]] | PI(17:1(9Z)/17:2(9Z,12Z)); 1-(9Z-heptadecenoyl)-2-(9Z,12Z-heptadecadienoyl)-glycero-3-phospho-(1'-myo-inositol) [Diacylglycerophosphoinositols [GP0601]] |
| 5133 | -1.589 | -1.698 | Ph | 449.108952 | 450.116229 | 0.038519  | C21H22O11    | 25 | Neoastilbin; (2S,3S)-Taxifolin 3-rhamnoside                                                                                                                                                        | 2',3,4,4',6'-Peptahydroxychalcone 4'-O-glucoside; PHC 4'-O-glucoside                                                                                    | Astilbin                                                                                                                                                 |
| 3500 | -1.572 | -1.811 | Ph | 371.134722 | 372.141998 | -0.092343 | C17H24O9     | 1  | Syringin; Eleutheroside B                                                                                                                                                                          |                                                                                                                                                         |                                                                                                                                                          |
| 1977 | -1.563 | -1.563 | NM | 315.144882 | 316.152158 | 0.418470  | C19H23ClN2   | 1  | <i>Cl37 isotope of Clomipramine</i>                                                                                                                                                                |                                                                                                                                                         |                                                                                                                                                          |
| 2745 | -1.561 | -1.756 | Lp | 345.119057 | 346.126333 | -0.142585 | C15H22O9     | 4  | Aucubin                                                                                                                                                                                            | Deutzioside                                                                                                                                             | Aucubin (see KEGG C09771) [C10 isoprenoids (monoterpenes) [PR0102]]                                                                                      |
| 3101 | -1.559 | -2.041 | Cb | 357.119069 | 358.126345 | -0.103262 | C16H22O9     | 3  | Tarennoside                                                                                                                                                                                        | 10-Deoxygeniposidic acid                                                                                                                                | Sweroside                                                                                                                                                |
| 3145 | -1.552 | -1.851 | Cb | 359.098337 | 360.105614 | -0.091802 | C15H20O10    | 1  | 3-Methoxy-4-hydroxyphenylglycol glucuronide (see KEGG C03033); (2S,3S,4S,5R,6R)-3,4,5-trihydroxy-6-[2-hydroxy-2-(4-hydroxy-3-methoxyphenyl)ethoxy]oxane-2-carboxylic acid [acetal]                 |                                                                                                                                                         |                                                                                                                                                          |
| 4329 | -1.550 | -1.135 | Ph | 405.082709 | 406.089985 | -0.028041 | C19H18O10    | 7  | Lancerin; 4-C-Glucosyl-1,3,7-trihydroxyxanthone                                                                                                                                                    | 5,7,3',5'-Tetrahydroxy-3,6,8,4'-tetramethoxyflavone [Flavones and Flavonols [PK1211]]                                                                   | 5,7,3',4'-Tetrahydroxy-3,6,8,5'-tetramethoxyflavone [Flavones and Flavonols [PK1211]]                                                                    |
| 2867 | -1.547 | -1.591 | NM | 349.114002 | 350.121279 | 0.454376  | C18H21ClN2O3 | 1  | <i>Cl37 isotope of Compound VII; 5-(5-(6-Chloro-4-(4,5-dihydro-2-oxazolyl)phenoxy)pentyl)-3-methylisoxazole</i>                                                                                    |                                                                                                                                                         |                                                                                                                                                          |
| 5363 | -1.544 | -1.544 | Lp | 461.363655 | 462.370932 | 0.047187  | C29H50O4     | 1  | 2 $\alpha$ -(3-Hydroxypropyl)-1 $\alpha$ ,25-dihydroxy-19-norvitamin D3; (5Z,7E)-(1R,2R,3R)-3-(hydroxypropyl)-19-nor-9,10-seco-5,7-cholestadien-1,3,25-triol [Vitamin D3 and derivatives [ST0302]] |                                                                                                                                                         |                                                                                                                                                          |
| 93   | -1.534 | -1.586 | Ph | 181.050603 | 182.057880 | -0.160171 | C9H10O4      | 17 | 3-(4-Hydroxyphenyl)lactate; 4-Hydroxyphenyllactate; p-Hydroxyphenyllactate; 2-                                                                                                                     | (R)-3-(4-Hydroxyphenyl)lactate                                                                                                                          | 3-(2,3-Dihydroxyphenyl)propanoate; 2,3-Dihydroxyphenylpropanoate                                                                                         |



|      |        |        |    |            |            |           |              |    |                                                                                                                                                                                                                          |                                                                                                                                                                                                                                                                                     |                                                                                                        |
|------|--------|--------|----|------------|------------|-----------|--------------|----|--------------------------------------------------------------------------------------------------------------------------------------------------------------------------------------------------------------------------|-------------------------------------------------------------------------------------------------------------------------------------------------------------------------------------------------------------------------------------------------------------------------------------|--------------------------------------------------------------------------------------------------------|
| 2276 | -1.509 | -1.978 | Ph | 327.144911 | 328.152188 | -0.047159 | C16H24O7     | 3  | Hydroxy-3-(4-hydroxyphenyl)propanoate<br>Rhododendrin                                                                                                                                                                    | Tetranor-PGEM; 11R-hydroxy-9,15-dioxo-2,3,4,5-tetranor-prostan-1,20-dioic acid [Prostaglandins [FA0301]]<br>ZZZ                                                                                                                                                                     | Prostaglandin M; 7R-hydroxy-5,11-dioxotetranorpropane-1,16-dioic acid [Prostaglandins [FA0301]]<br>ZZZ |
| 5695 | -1.507 | -1.486 | Ph | 481.135145 | 482.142422 | -0.009034 | C22H26O12    | 1  | Catalposide                                                                                                                                                                                                              | 1-O-Feruloyl-β-D-glucose; 1-Feruloyl-D-glucose                                                                                                                                                                                                                                      | Gentiopicroin (see KEGG C09782) [C10 isoprenoids (monoterpenes) [PR0102]]                              |
| 3049 | -1.507 | -1.808 | Ph | 355.103413 | 356.110690 | -0.119119 | C16H20O9     | 3  | Gentiopicroin; Gentiopicroside                                                                                                                                                                                           | 4-O-β-D-Glucosyl-sinapate                                                                                                                                                                                                                                                           |                                                                                                        |
| 3857 | -1.506 | -1.773 | Ph | 385.113996 | 386.121273 | -0.063172 | C17H22O10    | 2  | 1-O-Sinapoyl-β-D-glucose; 1-O-Sinapoyl β-D-glucoside                                                                                                                                                                     | Plantagoside                                                                                                                                                                                                                                                                        | 3,4,5,2',4',6'-Hexahydroxychalcone 2'-glucoside [Chalcones and dihydrochalcones [PK1212]]              |
| 5431 | -1.499 | -1.784 | Ph | 465.103882 | 466.111159 | 0.069908  | C21H22O12    | 6  | Quercetin 7-O-glucoside                                                                                                                                                                                                  | (9Z,12Z,15Z)-Octadecatrienoic acid; α-Linolenic acid; 9,12,15-Octadecatrienoic acid; Linolenate; α-Linolenate                                                                                                                                                                       | Crepenynate; (9Z)-Octadec-9-en-12-ynoate; (Z)-9-Octadecen-12-ynoic acid; Crepenynic acid               |
| 1255 | -1.481 | -1.432 | Lp | 277.217271 | 278.224548 | -0.117541 | C18H30O2     | 47 | (6Z,9Z,12Z)-Octadecatrienoic acid; 6,9,12-Octadecatrienoic acid; γ-Linolenic acid; Gamolenic acid                                                                                                                        |                                                                                                                                                                                                                                                                                     |                                                                                                        |
| 1918 | -1.477 | -1.477 | NM | 313.147866 | 314.155142 | 0.528679  | C19H23ClN2   | 1  | Clomipramine                                                                                                                                                                                                             |                                                                                                                                                                                                                                                                                     |                                                                                                        |
| 5036 | -1.454 | -1.557 | Cb | 443.192275 | 444.199552 | 0.009678  | C21H32O10    | 1  | dihydrophaseic acid 4-O-β-D-glucoside; (2Z,4E)-5-[(1R,3S,5R,8S)-3-(β-D-glucopyranosyloxy)-8-hydroxy-1,5-dimethyl-6-oxabicyclo[3,2,1]oct-8-yl]-3-methylpenta-2,4-dienoic acid [C15 isoprenoids (sesquiterpenes) [PR0103]] |                                                                                                                                                                                                                                                                                     |                                                                                                        |
| 4853 | -1.449 | -1.966 | NM | 433.156296 | 434.163573 | -0.914956 | C23H25F3N2OS | 1  | cis-(Z)-Flupenthixol                                                                                                                                                                                                     |                                                                                                                                                                                                                                                                                     |                                                                                                        |
| 3651 | -1.399 | -1.920 | Ph | 377.160554 | 378.167830 | -0.061522 | C20H26O7     | 5  | Chaparrinone                                                                                                                                                                                                             | Cnicin                                                                                                                                                                                                                                                                              | Eupahyssopin                                                                                           |
| 3109 | -1.373 | -1.879 | Lp | 357.264681 | 358.271958 | 0.093990  | C20H38O5     | 6  | 13,14-Dihydro PGF-1a; 7-[(1R,2R,3R,5S)-3,5-dihydroxy-2-[(3S)-3-hydroxyoctyl]cyclopentyl]heptanoic acid [secondary alcohol]                                                                                               | 9,13-dihydroxy-10-ethoxy-11-octadecenoic acid [Hydroxy fatty acids [FA0105]]                                                                                                                                                                                                        | 9,13-dihydroxy-12-ethoxy-10-octadecenoic acid [Hydroxy fatty acids [FA0105]]                           |
| 2575 | -1.360 | -1.552 | Cb | 339.093245 | 340.100522 | -0.117669 | C12H20O11    | 4  | Cellobiono-1,5-lactone; Cellobiose-1,5-lactone                                                                                                                                                                           | 3-Ketolactose                                                                                                                                                                                                                                                                       | 3-Ketosucrose; 3-Dehydro-α-D-glucosyl-β-D-fructofuranoside                                             |
| 1346 | -1.313 | -1.319 | Ph | 285.040436 | 286.047712 | -0.089823 | C15H10O6     | 34 | Luteolin; 3',4',5,7-Tetrahydroxyflavone; 5,7,3',4'-Tetrahydroxyflavone                                                                                                                                                   | Kaempferol; 3,4',5,7-Tetrahydroxyflavone; 4H-1-Benzopyran-4-one,3,5,7-trihydroxy-2-(4-hydroxyphenyl)-5,7,4'-Trihydroxyflavonol; C,I,75640; Indigo yellow; Kaempferol; Kempferol; Nimbecetin; Pelargidenolon; Populnetin; Rhamnolutein; Rhamnolutin; Robigenin; Swartzol; Trifolitin | Aureusidin                                                                                             |

|      |        |        |    |            |            |           |           |    |                                                                                                                                                                 |                                                                                                                                                                                                                                                                                                                       |                                                                            |
|------|--------|--------|----|------------|------------|-----------|-----------|----|-----------------------------------------------------------------------------------------------------------------------------------------------------------------|-----------------------------------------------------------------------------------------------------------------------------------------------------------------------------------------------------------------------------------------------------------------------------------------------------------------------|----------------------------------------------------------------------------|
| 2224 | -1.312 | -1.899 | NM | 325.129232 | 326.136508 | -0.138273 | C16H22O7  | 1  | Hinokitiol glucoside; β-Thujaplicin 2-O-β-D-glucoside                                                                                                           |                                                                                                                                                                                                                                                                                                                       |                                                                            |
| 1138 | -1.291 | -2.284 | Lp | 269.175813 | 270.183090 | -0.072009 | C15H26O4  | 1  | (10S)-Juvenile hormone III acid diol                                                                                                                            |                                                                                                                                                                                                                                                                                                                       |                                                                            |
| 2111 | -1.281 | -1.568 | Ph | 321.061550 | 322.068827 | -0.126928 | C15H14O8  | 3  | Leucodelphinidin                                                                                                                                                | Elephantorrhizol [Flavans, Flavanols and Leucoanthocyanidins [PK1202]]                                                                                                                                                                                                                                                | Galocatechin-4β-ol [Flavans, Flavanols and Leucoanthocyanidins [PK1202]]   |
| 1217 | -1.275 | -2.167 | Cb | 275.077209 | 276.084485 | -0.116446 | C11H16O8  | 1  | Ranunculin                                                                                                                                                      |                                                                                                                                                                                                                                                                                                                       |                                                                            |
| 2579 | -1.261 | -1.687 | Cb | 339.129643 | 340.136919 | -0.081507 | C13H24O10 | 1  | Methyl-2-α-L-fucopyranosyl-β-D-galactoside                                                                                                                      |                                                                                                                                                                                                                                                                                                                       |                                                                            |
| 5691 | -1.256 | -1.697 | Ph | 481.098785 | 482.106061 | 0.042399  | C21H22O13 | 1  | 3,4,2',3',4',6',α-Heptahydroxychalcone 2'-glucoside [Chalcones and dihydrochalcones [PK1212]]                                                                   |                                                                                                                                                                                                                                                                                                                       |                                                                            |
| 2219 | -1.245 | -1.191 | Ph | 325.092849 | 326.100126 | -0.128228 | C15H18O8  | 8  | 4-O-β-D-Glucosyl-4-hydroxycinnamate                                                                                                                             | <i>trans</i> -β-D-Glucosyl-2-hydroxycinnamate; β-D-Glucosyl-2-coumarate                                                                                                                                                                                                                                               | <i>cis</i> -β-D-Glucosyl-2-hydroxycinnamate; β-D-Glucosyl-2-coumarinate    |
| 6367 | -1.245 | -1.604 | Ph | 519.187226 | 520.194503 | 0.078545  | C26H32O11 | 2  | Brusatol                                                                                                                                                        | (-)-Pinoresinol glucoside                                                                                                                                                                                                                                                                                             | ZZZ                                                                        |
| 1304 | -1.212 | -1.257 | Lp | 281.248574 | 282.255850 | -0.106353 | C18H34O2  | 58 | (9Z)-Octadecenoic acid; (Z)-Octadec-9-enoic acid; Oleate; Oleic acid                                                                                            | (9E)-Octadecenoic acid; 9-Octadecenoic acid, (E)-; (E)-Oleic acid; D9- <i>trans</i> -Octadecenoic acid; 9- <i>trans</i> -Octadecenoic acid; <i>trans</i> -D9-Octadecenoic acid; <i>trans</i> -9-Octadecenoic acid; <i>trans</i> -Elaidic acid; <i>trans</i> -Oleic acid; Elaidic acid; Acide elaidique; Elaidinsauire | (6Z)-Octadecenoic acid; Petroselinic acid; <i>cis</i> -6-Octadecenoic acid |
| 3121 | -1.210 | -2.451 | Pp | 358.114330 | 359.121606 | -0.070431 | C15H21NO9 | 1  | Epinephrine glucuronide (see KEGG C03033); (2S,3S,4S,6S)-3,4,5,5-tetrahydroxy-3-[(1R)-1-hydroxy-2-methylaminoethyl]-6-(phenoxy)oxane-2-carboxylic acid [acetal] |                                                                                                                                                                                                                                                                                                                       |                                                                            |
| 1351 | -1.201 | -1.738 | Cb | 285.097947 | 286.105223 | -0.104355 | C13H18O7  | 4  | Salicin; Salicoside                                                                                                                                             | Gastrodin; 4-(Hydroxymethyl)phenyl-β-D-glucopyranoside                                                                                                                                                                                                                                                                | Methylarbutin                                                              |
| 1590 | -1.196 | -1.342 | Cb | 299.113594 | 300.120870 | -0.109047 | C14H20O7  | 1  | Salidroside; p-Hydroxyphenethyl alcohol 1-O-β-D-glucoside; Tyrosol glucoside                                                                                    |                                                                                                                                                                                                                                                                                                                       |                                                                            |
| 2074 | -1.195 | -1.764 | Cb | 319.139804 | 320.147080 | -0.116812 | C14H24O8  | 2  | Valproic acid glucuronide (see KEGG C03033); 3,4,5-trihydroxy-6-(2-propylpentanoyloxy)oxane-2-carboxylic acid [secondary alcohol]                               | Octanoylglucuronide (see KEGG C03033) [secondary alcohol]                                                                                                                                                                                                                                                             |                                                                            |
| 6826 | -1.180 | -1.180 | Ph | 549.197747 | 550.205023 | -0.006175 | C27H34O12 | 1  | Eucommin A; Medioresinol 4'-O-β-D-glucopyranoside                                                                                                               |                                                                                                                                                                                                                                                                                                                       |                                                                            |

|      |        |        |    |            |            |           |              |    |                                                                                                                                             |                                                                                                  |                                                                                                                                  |
|------|--------|--------|----|------------|------------|-----------|--------------|----|---------------------------------------------------------------------------------------------------------------------------------------------|--------------------------------------------------------------------------------------------------|----------------------------------------------------------------------------------------------------------------------------------|
| 60   | -1.134 | -1.163 | Ph | 175.024794 | 176.032070 | -0.100946 | C6H8O6       | 14 | Ascorbate; Ascorbic acid; L-Ascorbate; L-Ascorbic acid; Vitamin C                                                                           | D-Glucuronolactone; Glucurone; Glucofuranurono-6,3-lactone; D-Glucurono-3,6-lactone; D-Glucurone | 2-Hydroxy-3-oxoadipate                                                                                                           |
| 2088 | -1.128 | -1.784 | Pp | 320.062277 | 321.069553 | -0.132751 | C11H15NO10   | 1  | B-Citryl-L-glutamic acid; 3-[[[(2S)-1,5-dihydroxy-1, 5-dioxopentan-2-yl]carbamoyl]-3-hydroxypentanedioic acid [tertiary alcohol]            |                                                                                                  |                                                                                                                                  |
| 1966 | -1.101 | -1.967 | Ph | 315.087373 | 316.094649 | -0.123479 | C17H16O6     | 42 | Cajanol                                                                                                                                     | Homoferreirin                                                                                    | 2,3-Dihydro-6-hydroxy-2-(4-hydroxyphenyl)-5,7-dimethoxy-4H-1-benzopyran-4-one; 4',6-Dihydroxy-5,7-dimethoxyflavanone<br>ZZZ      |
| 1159 | -1.096 | -1.875 | Cb | 271.082290 | 272.089566 | -0.135033 | C12H16O7     | 2  | Arbutin; Ursin; Uvasol; Hydroquinone-O-β-D-glucopyranoside                                                                                  | α-Arbutin                                                                                        |                                                                                                                                  |
| 5385 | -1.075 | -1.386 | Ph | 463.088225 | 464.095501 | 0.054352  | C21H20O12    | 52 | Quercetin 3-O-glucoside; Isoquercitrin; 2-(3,4-Dihydroxyphenyl)-3-(β-D-glucofuranosyloxy)-5,7-dihydroxy-4H-1-benzopyran-4-one; Isotrifoliin | Gossypetin 8-rhamnoside                                                                          | Hyperin; Quercetin 3-galactoside                                                                                                 |
| 4027 | -1.074 | -2.182 | NM | 391.160971 | 392.168248 | 0.453424  | C21H27ClN2O3 | 1  | Cl37 isotope of Compound II(R/S); 5-(7-(6-Chloro-4-(5-hydro-4-methyl-2-oxazolyl)phenoxy)heptyl)-3-methylisoxazole                           |                                                                                                  |                                                                                                                                  |
| 4887 | -1.073 | -1.375 | Ph | 435.129686 | 436.136963 | 0.036110  | C21H24O10    | 16 | Phlorizin; Phlorhizin; Phloridzin                                                                                                           | Epiafzelechin 3-O-β-D-allopyranoside [Flavans, Flavanols and Leucoanthocyanidins [PK1202]]       | Arthromerin B [Flavans, Flavanols and Leucoanthocyanidins [PK1202]]                                                              |
| 5658 | -1.052 | -1.601 | Cb | 479.083140 | 480.090416 | 0.053553  | C21H20O13    | 18 | Gossypin; Gossypetin 8-O-glucoside                                                                                                          | 4-o-Galloylbergenin                                                                              | 11-o-Galloylbergenin                                                                                                             |
| 557  | -0.994 | -1.259 | Cb | 253.092852 | 254.100128 | -0.155851 | C9H18O8      | 4  | 3-β-D-Galactosyl-sn-glycerol; Galactosylglycerol                                                                                            | 2-(β-D-Glucosyl)-sn-glycerol                                                                     | Galactosylglycerol (see KEGG C05401); (2R,3R,4S,5R,6R)-2-[(2R)-2,3-dihydroxypropoxy]-6-(hydroxymethyl)oxane-3,4,5-triol [acetal] |
| 4335 | -0.982 | -1.113 | Ph | 405.119098 | 406.126375 | -0.018591 | C20H22O9     | 7  | Astringin                                                                                                                                   | Trichocarpin                                                                                     | Ananthoside [Flavans, Flavanols and Leucoanthocyanidins [PK1202]]                                                                |
| 574  | -0.956 | -0.981 | Lp | 255.232918 | 256.240194 | -0.141782 | C16H32O2     | 23 | Hexadecanoic acid; Hexadecanoate; Hexadecylic acid; Palmitic acid; Palmitate; Cetylic acid                                                  | Palmitic acid (see KEGG C00249); Hexadecanoic acid [carboxylic acid]                             | Trimethyltridecanoic acid; 4,8,12-trimethyltridecanoic acid [carboxylic acid]                                                    |
| 2811 | -0.946 | -1.998 | Cb | 347.171101 | 348.178377 | -0.116791 | C16H28O8     | 1  | Schizonepetoside E                                                                                                                          |                                                                                                  |                                                                                                                                  |
| 51   | -0.937 | -1.303 | Ph | 173.009145 | 174.016422 | -0.092226 | C6H6O6       | 6  | cis-Aconitate; cis-Aconitic acid                                                                                                            | trans-Aconitate; trans-Aconitic acid                                                             | Dehydroascorbate; Dehydroascorbic acid; L-                                                                                       |

|      |        |        |    |            |            |           |             |    |                                                                                                                             |                                                                                                                                                                                                       |                                                                                         |
|------|--------|--------|----|------------|------------|-----------|-------------|----|-----------------------------------------------------------------------------------------------------------------------------|-------------------------------------------------------------------------------------------------------------------------------------------------------------------------------------------------------|-----------------------------------------------------------------------------------------|
| 3141 | -0.931 | -1.474 | Ph | 359.077202 | 360.084478 | -0.109923 | C18H16O8    | 63 | Rosmarinate; Rosmarinic acid                                                                                                | 3',4',5-Trihydroxy-3,6,7-trimethoxyflavone                                                                                                                                                            | Dehydroascorbate; L-Dehydroascorbic acid                                                |
| 1329 | -0.900 | -0.949 | Lp | 283.264219 | 284.271495 | -0.124815 | C18H36O2    | 16 | Octadecanoic acid; Stearate; Stearic acid                                                                                   | Stearic acid (see KEGG C01530); Octadecanoic acid [carboxylic acid]                                                                                                                                   | 6-Methoxyaromadendrin 3-O-acetate                                                       |
| 4597 | -0.870 | -2.126 | Ph | 419.155889 | 420.163166 | 0.009385  | C18H28O11   | 2  | Lamioside                                                                                                                   | Lamioside (see KEGG C11645) [C10 isoprenoids (monoterpenes) [PR0102]]                                                                                                                                 | Stearic acid (see KEGG C01530); octadecanoic acid [Straight chain fatty acids [FA0101]] |
| 3093 | -0.754 | -1.035 | Ph | 357.086062 | 358.093339 | 0.982887  | C14H19N2O7P | 2  | N1-(5-Phospho- $\alpha$ -D-ribose)-5,6-dimethylbenzimidazole; $\alpha$ -Ribazole 5'-phosphate                               | N1-(5-Phospho- $\alpha$ -D-ribose)-5,6-dimethylbenzimidazole (see KEGG C04778); [(2R,3R,4R,5S)-5-(5,6-dimethylbenzimidazol-1-yl)-3,4-dihydroxy-oxolan-2-yl]methoxyphosphonic acid [secondary alcohol] |                                                                                         |
| 6072 | -0.725 | -0.969 | Cb | 501.146171 | 502.153448 | 0.125686  | C18H30O16   | 1  | $\alpha$ -L-Rhamnopyranosyl-(1->2)- $\beta$ -D-galactopyranosyl-(1->2)- $\beta$ -D-glucuronopyranoside; $\beta$ -Fabatriose |                                                                                                                                                                                                       |                                                                                         |
| 2807 | -0.702 | -1.973 | Cb | 347.134705 | 348.141981 | -0.146980 | C15H24O9    | 1  | Leonuridine                                                                                                                 |                                                                                                                                                                                                       |                                                                                         |
| 1186 | -0.699 | -1.496 | Ph | 273.076829 | 274.084105 | -0.067655 | C15H14O5    | 26 | Phloretin                                                                                                                   | $\alpha$ -Pyrufuran                                                                                                                                                                                   | $\beta$ -Pyrufuran                                                                      |
