# Supplementary material for: The Combination of Both Heat and Water Stresses May Worsen Botryosphaeria Dieback Symptoms in Grapevine
Source: MDPI journal article supplement (doi:10.3390/plants12040753), 2023-02-08
Supplement: s1 [file s1]

**Supplemental File 4 : List of annotated compounds regulated in Time A and B on the non-inoculated samples (NI) under the 3 abiotic stress, water (WS), heat (HS) and combined water and heat (WSHS) stresses.** Up- and down-regulated compounds under stresses are indicated with the + and – signs, together with their attributed identification number (ID) and structural categories (Cat.); Phytochemicals (Ph), Lipids (Lp), Carbohydrates (Cb), Peptides (Pp), Amino sugars (AmS) and undetermined or drug (NM).

**Table a): List the 14 annotated compounds from the 156 *m/z* regulated in Time A**

| ID   | WS<br>A | HS<br>A | WSHS<br>A | Cat. | Name                              |
|------|---------|---------|-----------|------|-----------------------------------|
| 3213 |         |         | +         | Ph   | Nagilactone C                     |
| 1750 |         |         | +         | Pp   | Glutathione                       |
| 7699 |         |         | +         | Ph   | Corilagin                         |
| 3099 |         |         | +         | Ph   | Gentiopicroin (isotope)           |
| 8238 |         |         | -         | Lp   | PA(14:1(9Z)/22:4(7Z,10Z,13Z,16Z)) |
| 2983 |         | -       | -         | Ph   | 2-Caffeoylisocitrate              |
| 1347 |         | -       | -         | NM   | Oxazepam                          |
| 2482 |         | -       | -         | Ph   | 3-Epihydroxymugineic acid         |
| 8306 |         | -       | -         | Ph   | Hexaacetylpyracanthoside          |
| 8254 |         |         | -         | Lp   | PA(16:20:4(5Z,8Z,11Z,14Z))        |
| 2215 |         | -       | -         | Ph   | Sinapoyl tartronate               |
| 8177 |         |         | -         | Lp   | PA(13:22:2(13Z,16Z))              |
| 2804 |         | -       | -         | NM   | Compound VII                      |

**Table b): List of the 36 annotated compounds from the 173 *m/z* regulated in Time B**

| ID   | WS<br>B | HS<br>B | WSHS<br>B | Cat. | Name                                                                    |
|------|---------|---------|-----------|------|-------------------------------------------------------------------------|
| 15   | +       | +       |           | Ph   | Phenylpyruvate                                                          |
| 2127 |         | +       |           | Pp   | Tetraneurin A                                                           |
| 4380 |         | +       |           | Ph   | Khellol glucoside                                                       |
| 1219 |         | +       |           | Ph   | Lactucin                                                                |
| 2074 |         | +       |           | Cb   | Valproic acid glucuronide                                               |
| 1512 | +       | +       |           | Ph   | Phaseolic acid                                                          |
| 4953 |         | +       |           | Ph   | Ginkgolide C                                                            |
| 1191 |         | +       |           | Lp   | 3-Hydroxytetradecanedioic acid                                          |
| 66   |         | +       |           | Cb   | D-Glucono-1,5-lactone                                                   |
| 2413 | +       | +       |           | Ph   | 3,5,6,7,2',3',4'-Heptahydroxyflavone                                    |
| 156  |         | +       |           | Ph   | 3-(3,4-Dihydroxyphenyl) lactate                                         |
| 9    |         | +       |           | Lp   | 2-Oxadipate                                                             |
| 1392 |         |         | +         | Pp   | Ophthalmic acid                                                         |
| 2579 |         |         | +         | Cb   | Methyl-2- $\alpha$ -L-fucopyranosyl- $\beta$ -D-galactoside             |
| 487  |         |         | +         | AmS  | Linamarin                                                               |
| 3963 | -       | +       |           | Ph   | Monotropein                                                             |
| 187  |         | +       |           | Ph   | Oxaloglutarate                                                          |
| 8451 | -       | -       | -         | Ph   | Yamogenin 3-O-neohesperidoside                                          |
| 5361 | -       | -       |           | Cb   | Patrinoside                                                             |
| 5002 | -       | -       |           | Lp   | PG(6:6); 1,2-dihexanoyl-sn-glycero-3-phospho-(1'-sn-glycerol)           |
| 199  | -       | -       | -         | Ph   | (R)-2-Hydroxybutane-1,2,4-tricarboxylate; Homocitrate                   |
| 3597 | -       | -       |           | Lp   | 17 $\beta$ -Hydroxy-7 $\alpha$ -mercaptoandrost-4-en-3-one 7-propionate |
| 2486 | -       | -       |           | Lp   | Steroid O-sulfate                                                       |
| 2931 | -       | -       |           | Lp   | Estradiol-17 $\beta$ 3-sulfate                                          |
| 3664 | -       | -       |           | AmS  | 4-Deoxy- $\beta$ -D-gluc-4-enuronosyl-(1,3)-N-acetyl-D-galactosamine    |
| 7463 | -       | -       | -         | Ph   | Atalanine                                                               |
| 3413 | -       |         |           | Lp   | Tetracosanoic acid                                                      |
| 8600 | -       | -       | -         | Lp   | 1-Hexadecanoyl-2-(9Z-octadecenoyl)-sn-glycero-3-phospho-sn-glycerol     |
| 120  | -       | -       | -         | Pp   | N-Acetyl-L-glutamate                                                    |
| 6097 | -       |         |           | Cb   | Raffinose                                                               |

|      |   |   |   |    |                                                                                        |
|------|---|---|---|----|----------------------------------------------------------------------------------------|
| 2681 |   |   | - | Cb | Sucrose (isotope)                                                                      |
| 8293 | - | - |   | Lp | PA(18:/18:2(9Z,12Z)); 1-octadecanoyl-2-(9Z,12Z-octadecadienoyl)-sn-glycero-3-phosphate |
| 5540 | - | - |   | Ph | Proteacin                                                                              |
| 1590 | - | - |   | Cb | Salidroside                                                                            |
| 2614 |   |   | - | Cb | Sucrose                                                                                |

**Table c) List of 21  $m/z$  common to A and B time-points**

| ID   | WS<br>A | WS<br>B | HS<br>A | HS<br>B | WSHS<br>A | WSHS<br>B | Cat. | Name         |
|------|---------|---------|---------|---------|-----------|-----------|------|--------------|
| 5304 |         |         |         |         | +         | +         |      |              |
| 6229 |         | -       |         | -       | +         |           |      |              |
| 6769 |         |         |         |         | +         | +         |      |              |
| 3091 |         |         | -       | -       | -         | -         |      |              |
| 2840 |         | -       |         | -       | +         |           |      |              |
| 3810 |         |         | +       |         | +         | +         |      |              |
| 214  |         |         | +       | +       |           |           |      |              |
| 1844 |         |         |         |         | +         | +         |      |              |
| 5098 |         |         | -       | -       | -         | -         |      |              |
| 5544 |         |         |         |         | +         | +         |      |              |
| 5268 |         |         |         |         | +         | +         |      |              |
| 3112 |         |         | -       | +       | -         |           |      |              |
| 5136 | -       |         | -       | -       | -         | -         |      |              |
| 3378 | -       |         | -       | +       | -         |           |      |              |
| 191  |         |         |         |         | +         | +         | Pp   | L-Tryptophan |
| 4247 |         | -       | +       |         | +         |           |      |              |
| 4783 |         |         | -       | -       | -         | -         |      |              |
| 8217 |         | -       |         |         | +         |           |      |              |
| 3204 |         | +       | -       | +       | -         | +         |      |              |
| 1538 |         |         |         |         | +         | +         |      |              |
| 7891 |         |         | -       | +       | -         |           |      |              |
